# DNA double-strand break end synapsis by DNA loop extrusion

Jin Yang<sup>1,2</sup>, Hugo B. Brandão<sup>1,2,\*</sup>, and Anders S. Hansen<sup>1,2,\*</sup>

<sup>1</sup> *Department of Biological Engineering, Massachusetts Institute of Technology, Cambridge, 02139*

<sup>2</sup> *The Broad Institute of MIT and Harvard, Cambridge, 02142*

\* *Corresponding authors: Hugo B. Brandão ([hbrandao@mit.edu](mailto:hbrandao@mit.edu)); Anders S. Hansen ([ashansen@mit.edu](mailto:ashansen@mit.edu))*

**DNA double-strand breaks (DSBs) occur every cell cycle and must be efficiently repaired. Non-homologous end joining (NHEJ) is the dominant pathway for DSB repair in G1-phase. The first step of NHEJ is to bring the two DSB ends back into proximity (synapsis). However, although synapsis is generally assumed to occur through passive diffusion, we show here that passive diffusion is unlikely to be consistent with the speed and efficiency of NHEJ observed in cells. Instead, we hypothesize that DNA loop extrusion facilitates synapsis. By combining experimentally constrained simulations and theory, we show that the simplest loop extrusion model only modestly facilitates synapsis. Instead, a loop extrusion model with targeted loading of loop extruding factors (LEFs), a small portion of long-lived LEFs as well as LEF stabilization by boundary elements and DSB ends achieves fast synapsis with near 100% efficiency. We propose that loop extrusion plays an underappreciated role in DSB repair.**

## Introduction

DNA double-strand breaks (DSBs) can be caused by environmental agents such as radiation and drugs [1–3], and endogenous metabolism such as transcription and replication stress [4, 5]. For example, normal metabolism has been estimated to cause ~1-50 DSBs per human cell per day [6, 7]. Consequently, fast and reliable DNA repair is necessary to prevent deleterious chromosomal rearrangements such as translocations, inversions, amplifications, and deletions [8]. The three major DSB repair pathways are non-homologous end-joining (NHEJ), alternative end-joining (Alt-EJ), and homologous recombination (HR) [9–11]. The specific DSB pathways choice depends on sequence, chromatin context, cell cycle phase, and the complexity of DSB ends [9, 11, 12]. Here we focus on NHEJ which is operational throughout the cell cycle and the dominant DSB repair pathway in G1-phase [13].

While much is known about the proteins that are recruited to DSB ends, their order of recruitment, and the molecular mechanisms involved in the repair [3, 14, 15], what all recruitment mechanisms have in common is that they are **reactive**: recruitment of DSB repair factors begins after the DSB has occurred and been sensed. This introduces a time delay [16] during which the DSB ends can diffuse apart [17], which may delay repair, prevent repair, or result in aberrant ligation between distinct chromosomes causing translocations [18]. Indeed, prior experimental

31 work has demonstrated that, in human cells, DSB ends can move several hundreds of nanometers apart within  
32 minutes after a DSB has occurred [19–22]. The DNA DSB repair process through NHEJ therefore requires two  
33 major steps: 1) bringing the DSB ends back into proximity (this process is called synapsis [23]) and 2) recruiting the  
34 necessary proteins to covalently ligate the synapsed DSB ends back together (**Fig. 1A**). While much is known about  
35 the second NHEJ step, the alignment and covalent linkage of synapsed broken DNA ends [11, 24], comparatively  
36 less is known about the first step, the process leading to DSB end synapsis.

37 Synapsis, the bringing of DSB ends back together for NHEJ, is generally assumed to be mediated by passive  
38 3D diffusion [22] (**Fig. 1B**). However, here we show (see **Results** below) that passive diffusion is likely both too  
39 slow and too inefficient to be consistent with the speed and >95% efficiency of DSB repair by NHEJ in G1-phase  
40 in mammalian cells [25]. The inability of passive diffusion to explain the efficiency of synapsis *in vivo* suggests  
41 that alternative mechanisms must be operational inside the cell. Here, we hypothesize that DNA loop extrusion  
42 contributes to DSB repair by mediating fast and efficient DSB end synapsis. Since Alt-EJ also requires synapsis  
43 before the ligation of two DSB ends, the mechanism of synapsis facilitated by DNA loop extrusion we propose also  
44 applies to Alt-EJ [9, 26].

45 Loop extrusion is emerging as a universal mechanism that folds genomes into loops and domains [27]. In mam-  
46 malian interphase, the primary loop extruding factor (LEF) is the cohesin complex, which is thought to extrude DNA  
47 bi-directionally at a rate of  $\sim 0.5\text{--}2$  kb/s until cohesin is blocked by a Boundary Element (BE) [28–30]. The pri-  
48 mary BE in mammalian interphase is the insulator protein, CTCF [31]. By extruding the genome until it encounters  
49 CTCF boundaries, cohesin-mediated loop extrusion folds the genome into loops and domains known as Topolog-  
50 ically Associating Domains (TADs) [32, 33] (**Fig. 1C**). Beyond cohesin, several other Structural Maintenance of  
51 Chromosomes (SMC) family complexes function as LEFs, including the condensin complexes that mediate mitotic  
52 chromosome compaction and bacterial SMC complexes that help resolve sister chromatids [27, 34–37].

53 We propose that loop extrusion likely plays a role in DSB repair for at least three reasons. First, loop extrusion  
54 is operational across the entire interphase genome. Thus, the loop extrusion and DSB repair machinery will nec-  
55 essarily encounter each other when a DSB occurs and have to interact. Second, experimental estimates suggest  
56 that most interphase DNA is inside an extruding cohesin loop at any given time [38–40] (**Supplementary Note 3.1**).  
57 Thus, a DSB is more likely to occur inside a cohesin loop than outside. Third, unlike known *reactive* DSB repair  
58 mechanisms, loop extrusion could function as a *preemptive* mechanism that prevents the DSB ends from diffusing  
59 apart and simultaneously accelerate the synapsis process, thereby promoting fast and efficient DSB repair. To test  
60 this hypothesis, we combine analytical theory and simulations, to quantitatively investigate the extent to which loop  
61 extrusion may help DNA repair by facilitating synapsis for NHEJ. We find that DNA loop extrusion can promote very  
62 fast ( $\sim 10$  minutes) and efficient ( $\geq 95\%$ ) synapsis, and identify the parameter regimes required for efficient synap-  
63 sis. Finally, we make several experimentally testable predictions to probe the relationship between the role of loop  
64 extrusion and DSB synapsis in NHEJ.

## 65 Results

### 66 3D diffusion may be too inefficient to promote DSB end synapsis in mammalian cells

67 We began by investigating the prevailing model: that passive 3D diffusion mediates DSB synapsis [22]. The average  
68 synapsis time is estimated to be around 6-11 minutes in mammalian cells based on prior experimental data [41]  
69 (**Supplementary Note 1**). To see if 3D diffusion mediated synapsis is consistent with these values, we used an  
70 analytical formula [42] to estimate the mean synapsis time in a mammalian nucleus. Using experimental estimates  
71 for the chromatin diffusion coefficient  $D = (4 \pm 1.9) \times 10^{-3} \mu\text{m}^2/\text{s}$  [43], a confinement radius of broken DNA of  
72  $990 \pm 90 \text{ nm}$  [44] and several other parameters (**Supplementary Note 1**), we calculated that the mean synapsis  
73 time for broken DNA ends via 3D diffusion is in the range of 20-90 minutes. We note that since the experimental  
74 parameter values of chromatin dynamics and diffusion before, during, and after a DSB has occurred are associated  
75 with significant uncertainty, our estimate is too. Nevertheless, for this reason and for additional reasons we discuss  
76 in **Supplementary Note 1**, our estimates strongly suggests that 3D diffusion of DSB ends alone will fail more  
77 frequently than expected experimentally (i.e. between 20% to 70% of the time).

### 78 A plausible paradigm for DSB repair via DNA loop extrusion

79 Since 3D diffusion likely results in unphysiologically slow rates of DSB end synapsis, we reasoned that alternative  
80 mechanisms facilitate the synapsis process in parallel. One mechanism that is operational in parallel to 3D diffusion,  
81 and could facilitate DSB end synapsis is DNA loop extrusion by loop-extruding factors (LEFs) (such as cohesins,  
82 condensins, and other SMC complexes that may be operational inside the nucleus [37]). We hypothesize that loop  
83 extrusion facilitates DSB synapsis and repair in two ways.

84 First, since most of the genome is inside LEF loops [38–40], a DSB is statistically more likely to occur inside a  
85 loop than outside. If DSBs occur inside a LEF-mediated DNA loop, the DSB ends are constrained and unable to  
86 diffuse too far apart (**Fig. 1D**), and we call such a LEF a **constraining LEF**. The constraining LEFs' presence on  
87 DNA provides a time window of opportunity for the two DSB ends to synapse either through passive diffusion [17] or  
88 through the action of **gap-bridging LEFs** (explained below), where we define a **gap** as the DNA segment between  
89 the constraining LEF and the broken DNA end (**Fig. 1D**).

90 Second, while the constraining LEF holds together the two pieces of DNA, **gap-bridging LEFs**, dynamically  
91 loaded between one DSB end and the constraining LEF can extrude loops that bring each DSB end into proximity  
92 with the constraining LEF (illustrated in **Fig. 1D**). If both sides of the DSB are extruded by gap-bridging LEFs, the  
93 DSB ends will be brought into spatial proximity, thereby achieving synapsis (**Fig. 1D**, top branch); the stochastic  
94 nature of LEFs binding to and unbinding from gaps means that multiple attempts may be required to simultaneously  
95 bridge both gaps via gap-bridging LEFs before synapsis is achieved (success) or until the constraining LEF unloads  
96 (failure) (**Supplementary Fig. 1**).

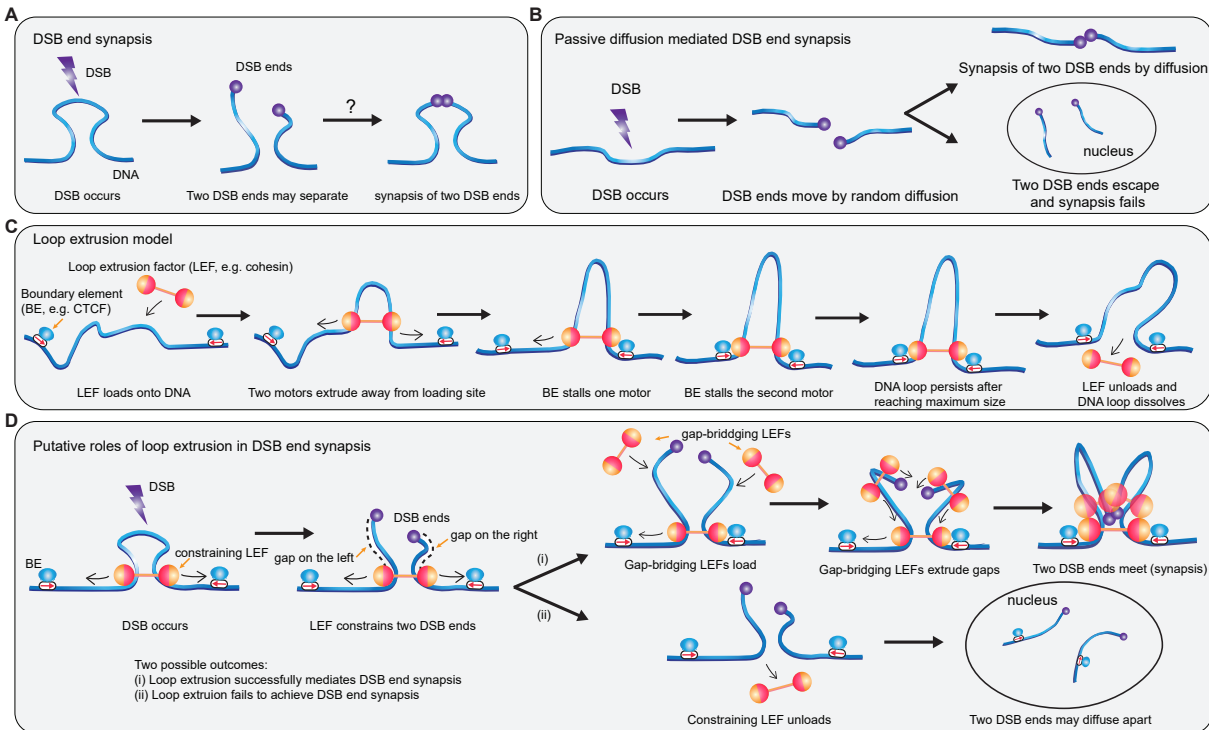

97 **Figure 1. A model of DSB synopsis, mediated by DNA loop extrusion. (A)** After the DSB has occurred, the two DSB ends  
 98 may separate. How the two DSB ends are constrained from diffusing too far apart and brought back into proximity for downstream  
 99 repair is not well understood. **(B)** Overview of DSB end synopsis mediated by passive diffusion. **(C)** Overview of the loop  
 100 extrusion model. Loop extruding factors (LEFs) extrude bidirectionally away from the loading site; the two motors of a LEF extrude  
 101 independently: after one motor is stalled by a boundary element (BE), the other motor can continue extruding until encountering a  
 102 BE on the other side. **(D)** Loop extrusion may facilitate DSB end synopsis in two ways: (1) the constraining LEF prevents the two  
 103 DSB ends from diffusing apart after DSB; (2) Additional gap-bridging LEFs loaded within the loop extruded by constraining LEF  
 104 can extrude sub-loops to bring the two DSB ends into proximity. However, if the constraining LEF falls off before the two DSB  
 105 ends are brought into proximity by gap bridging LEFs, the two DSB ends may diffuse apart. In our simulations, we assume LEFs  
 106 cannot pass one another or DSB ends, and synopsis always fails once no constraining LEF remains for a given DSB.

107 In the above, we assumed that LEFs stop extruding when they reach a DSB end (i.e., they do not “fall off” the  
 108 DNA at the site of DSB) [45]. In addition, we note that any LEF can serve as “constraining” or “gap-bridging”, and  
 109 that designation only depends on its current position with respect to the DSB. For example, a constraining LEF  
 110 unloaded from one locus can reload at another DSB site to function as a gap-bridging LEF. Altogether, the action  
 111 of constraining LEFs and gap-bridging LEFs, may constitute a new paradigm for thinking about the process of DSB  
 112 end synopsis.

113 Thus, we set out to test our hypothesis that loop extrusion may facilitate DSB repair by facilitating synopsis by  
 114 asking two questions: 1) Can the process of DNA loop extrusion achieve more efficient synopsis than 3D diffusion?  
 115 2) If so, can we identify physiologically plausible conditions for loop extrusion (e.g. LEF density on DNA or LEF  
 116 processivity) that achieve near-perfect synopsis efficiency?

### 117 **A simple 3-parameter loop extrusion model predicts modest synopsis efficiency**

118 To test our hypothesis that loop extrusion may promote DSB repair by facilitating DSB synopsis, we performed  
 119 simulations of loop extrusion dynamics that incorporate DSBs, LEFs, and BEs. We simulated chromosomal DNA

120 as a 1D lattice of sites that could be bound by LEFs. BEs were placed periodically on the lattice to create TADs  
121 of various sizes within the experimentally expected range [46–48] (**Fig. 2A**). In our simulated chromosomal DNA,  
122 we introduced DSBs approximately every 10 Mb, and followed the LEF dynamics on this lattice. LEFs were allowed  
123 to dynamically load to any lattice site not occupied by other LEFs, extrude loops, and dissociate. LEFs were not  
124 allowed to extrude past each other or DSB ends. We recorded the percentage of the DSB ends synapsed through  
125 extrusion (i.e., the synapsis efficiency) and the mean synapsis time (**Fig. 2A**). Example videos of successful and  
126 failed synapsis events can be found in **Supplementary Videos 1-2**. In its simplest form, 3 parameters are necessary  
127 to simulate loop extrusion (**Fig. 2B**): 1) the LEF separation, i.e., the total DNA length divided by the total number of  
128 LEFs on DNA; 2) the LEF processivity, i.e., the average length of DNA extruded by an unobstructed LEF (processivity  
129 = LEF residence time  $\times$  extrusion speed); 3) the boundary strength, defined as the probability for a BE to stall  
130 LEF extrusion when the LEF encounters a BE, which can be conceptualized as the occupancy of CTCF binding  
131 sites. We then simulated loop extrusion and DSB synapsis across the whole range of boundary strengths (0 to  
132 1) and a plausible range of processivities and separations, constrained by recent experimental measurements and  
133 models [32, 39, 40] (**Supplementary Note 3.1**).

134 First, we studied the role of boundary strength (i.e. the probability that a LEF will stall at a BE) on synapsis  
135 efficiency. On one hand, we reasoned that boundary strength may help increase synapsis efficiency by shortening  
136 the gap between the constraining LEF and DSB ends, thus accelerating the gap-bridging process. On the other  
137 hand, the boundary strength could decrease synapsis efficiency by reducing the probability of DSBs occurring inside  
138 a loop since higher boundary strength will reduce the overall loop size, i.e., a smaller fraction of the chromosome  
139 will be extruded into loops. Surprisingly, our simulations revealed that both synapsis efficiency and mean synapsis  
140 times were largely independent of boundary strength (**Fig. 2C**). On investigating why boundary strength played such  
141 a small role on synapsis efficiency and mean synapsis times, we found that LEFs are more likely to be stalled by  
142 other LEFs before encountering BEs for the extrusion parameter values we investigated. Thus, BEs have a relatively  
143 small effect on LEF loop sizes (**Supplementary Fig. 2**). We conclude that boundary strength only mildly affects  
144 synapsis efficiency within the simple loop extrusion model and therefore we henceforth use a boundary strength of  
145 0.5 (which is also in line with experimental estimates of CTCF binding site occupancy [39, 40]).

146 In contrast to boundary strength, however, simulations showed that LEF processivity and separation both strongly  
147 affect DSB synapsis efficiency and speed (**Fig. 2D**). Interestingly, when synapsis is achieved, the mean synapsis  
148 time is reasonably close to the physiological timescales of 6-11 minutes (**Fig. 2D**, bottom panel) [41]. Generally,  
149 we found that low separations and high processivities yield higher synapsis efficiency (**Fig. 2D**, top panel). The  
150 intuition is that low separations between LEFs means that there are more LEFs on the DNA to both help constrain  
151 the DSBs as well as bridge the gaps between the constraining LEF and the DSB ends. High processivities make  
152 it so that LEFs remain longer on the DNA affording a greater time window for LEFs to achieve synapsis, leading to  
153 higher mean synapsis time (**Fig. 2C**, bottom panel; **Fig. 2D**, bottom panel). Nevertheless, we find that the simple  
154 loop extrusion model only achieves moderately efficient DSB end synapsis (<45% synapsis) and requires a high  
155 processivity/separation ratio (e.g., processivity = 1000 kb; separation = 62.5 kb). These processivity and separation  
156 values are likely on the border of the physiologically plausible range for loop extrusion in mammalian interphase

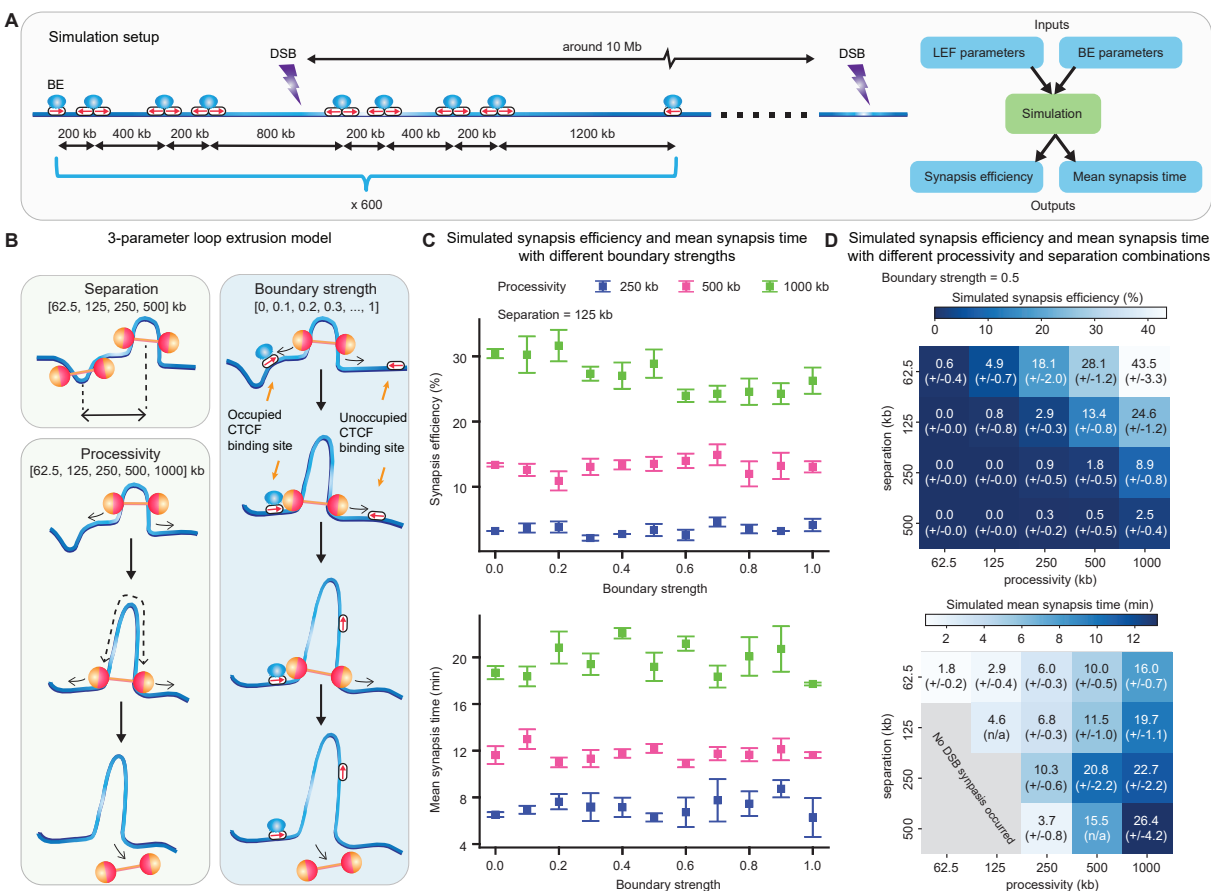

161 **Figure 2. High LEF processivity and low LEF separation increase synapsis efficiency (A)** Overview of simulation setup. **(B)**  
 162 3-parameter model of loop extrusion-facilitated DSB end synapsis. LEF parameters (left panel): processivity and separation; BE  
 163 parameter (right panel): boundary strength. **(C)** Boundary strength has little impact on DSB end synapsis under the 3-parameter  
 164 model. The error bars represent the standard error of mean,  $n = 3$  independent simulations. **(D)** Low synapsis efficiency under  
 165 the 3-parameter model. Heatmaps of synapsis efficiency (top) and mean synapsis time (bottom, assuming total extrusion speed  
 166 of 1 kb/s) for different LEF processivity and separation combinations (numbers in brackets show standard error of mean,  $n = 3$   
 167 independent simulations, with 216-218 DSB events per simulation). The grey area in the bottom plot indicates no DSB synapsis  
 168 occurred.

157 **(Supplementary Note 3.1).**

158 Together, these results show that whereas BE strength minimally affects synapsis, a high processivity/separation  
 159 ratio facilitates DSB end synapsis with moderate efficiency. Thus, while loop extrusion can facilitate DSB synapsis,  
 160 the simple loop extrusion model is too inefficient to do so in mammalian interphase.

### 169 **Probability theory elucidates two relative timescales underlying synapsis efficiency**

170 To mechanistically and quantitatively understand why the simple loop extrusion model only achieved moderate  
 171 synapsis efficiency, we formulated a bottom-up and mechanistically precise analytical theory that predicts synapsis  
 172 efficiency as a function of loop extrusion parameters (**Supplementary Note 2**). We found that synapsis efficiency,  
 173  $P_{\text{synapsis}}$ , can be decomposed into the product of two probabilities: the probability of the DSB occurring inside a  
 174 DNA loop such that the broken DNA ends remain constrained by LEFs,  $P_{\text{constrained}}$ , and the conditional probability  
 175 of end-joining given that the DSB is constrained,  $P_{\text{end-joining|constrained}}$  (**Fig. 3A, Supplementary Note 2.1**).

176 To build intuition, we examine **Fig. 3A**:  $P_{\text{synapsis}}$  depends on both  $P_{\text{constrained}}$  and  $P_{\text{end-joining|constrained}}$ . On  
177 considering the temporal order of events, however, we note that end joining may only occur if the constraining LEF  
178 is present (hence the conditional probability). As such,  $P_{\text{constrained}}$  sets an upper bound for the  $P_{\text{synapsis}}$ . Therefore,  
179 to achieve near-perfect synapsis efficiency, it is necessary to have  $P_{\text{constrained}}$  as close to 1 as possible, so we first  
180 consider  $P_{\text{constrained}}$ .

181  $P_{\text{constrained}}$  can be calculated as the fraction of the genome that is covered by LEF-mediated DNA loops. By  
182 accounting for the effect of BEs on LEFs, we derive an expression for  $P_{\text{constrained}}$  that accurately estimates the  
183 fraction of the genome inside loops (see (28) in **Supplementary Note 2.2**), as shown in **Fig. 3B**. Both our theory  
184 and simulations show that the larger the processivity,  $\lambda$ , and the smaller the separation,  $d$ , the higher the fraction  
185 of DSB sites constrained. This indicates that to achieve near-perfect synapsis efficiency mediated by DNA loop  
186 extrusion, it is first necessary that the genome has a high coverage by loops.

187 Next, to understand the role of gap-bridging LEFs on mediating synapsis, we examined how  
188  $P_{\text{end-joining|constrained}}$  modulates the DSB synapsis efficiency. We derived a general analytical expression for  
189  $P_{\text{end-joining|constrained}}$  that accounts for gap-bridging LEFs that load and finish extruding gaps on both sides of the  
190 DSB before the constraining LEF unloads. As simplifications, we assumed that only one gap-bridging LEF on each  
191 side of the DSB is bridging the gap, and that if one or more gap-bridging LEFs are present within the constraining  
192 LEF at the time of DSB occurrence, one of the two gaps is bridged already (Eqs.(68)-(71), see **Supplementary Note**  
193 **2.3**). We found that two relative timescales dominate the simplified expression of  $P_{\text{end-joining|constrained}}$ : the ratio of  
194 loading time  $\tau_{\text{loading}}$  to the constraining time  $\tau_{\text{constrained}}$ , and the ratio of extrusion time  $\tau_{\text{extrusion}}$  to the constraining  
195 time  $\tau_{\text{constrained}}$  (**Fig. 3C-D, Supplementary Note 2.3**).  $\tau_{\text{loading}}$  is the time it takes for gap-bridging LEFs to load into  
196 the gap between the DSB and the constraining LEF;  $\tau_{\text{constrained}}$  is the time from when the DSB has occurred until the  
197 constraining LEF unloads; and  $\tau_{\text{extrusion}}$  is the time for the gap-bridging LEFs to finish extruding the gap between the  
198 DSB end and the constraining LEF. We find that while reducing either relative timescale improves synapsis efficiency,  
199 larger improvement can be achieved by reducing  $\tau_{\text{loading}}/\tau_{\text{constrained}}$  than by reducing  $\tau_{\text{extrusion}}/\tau_{\text{constrained}}$  (**Fig.**  
200 **3E**). Indeed, comparison of  $\tau_{\text{loading}}/\tau_{\text{constrained}}$  and  $\tau_{\text{extrusion}}/\tau_{\text{constrained}}$  across different combinations of processivity  
201 and separation show that loading of gap-bridging LEFs is generally the rate-limiting step of the synapsis process  
202 (**Supplementary Fig. 3**). Notably, biological processes that prolong the constraining LEF lifetime will contribute  
203 even more strongly to the efficiency of DSB end synapsis than processes that alter any single one of the relative  
204 time-scales (since  $\tau_{\text{constrained}}$  is the denominator for both the  $\tau_{\text{loading}}$  and  $\tau_{\text{extrusion}}$  time-scales).

205 Our analytical theory allows us to understand both mechanistically and quantitatively how the various loop extru-  
206 sion model parameters regulate synapsis efficiency, and reveal the relative impact of each parameter on synapsis  
207 efficiency. Recent experimental studies have proposed a wide range of possible mechanistic extensions to the  
208 simple loop extrusion models considered so far. We therefore next used our theory to estimate which of the most  
209 mechanistically plausible extensions would also likely affect synapsis efficiency, and we consider four extensions in  
210 the next sections.

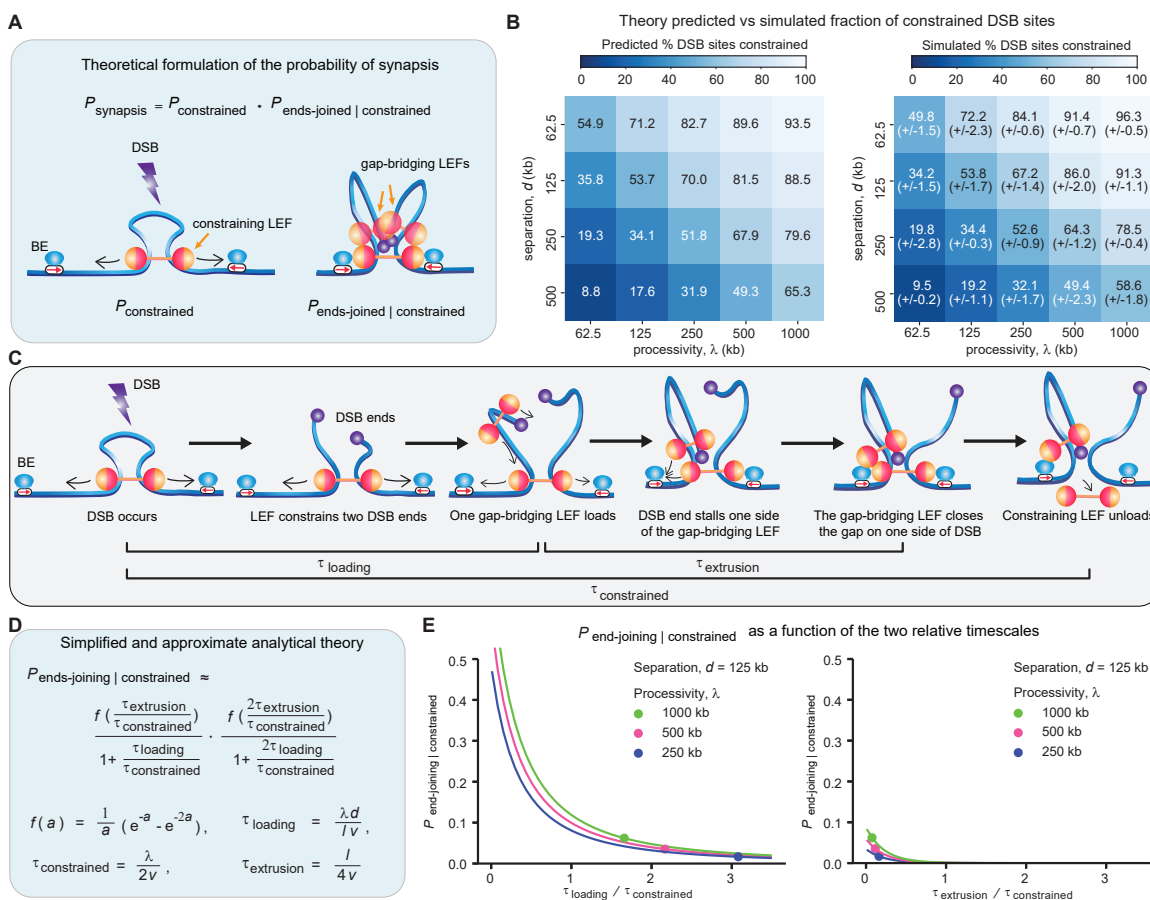

**Figure 3. Synapsis can be quantitatively predicted and mechanistically understood using an analytical theory** (A) The probability of synapsis can be decomposed into the probability of being constrained and the conditional probability of gap-bridging given that the DSB was constrained. (B)  $P_{\text{constrained}}$  can be predicted by the ratio of processivity and separation. Heatmaps of predicted (left) and simulated (right) numbers show standard error of mean,  $n = 3$  independent simulations, with 216-218 DSB events per simulation) fraction of constrained DSB sites with different combinations of processivity (y axis) and separation (x axis). Boundary strength = 0.5 was used in the simulations. (C) Three important timescales in DSB end synapsis. (D)  $P_{\text{end-joining} | \text{constrained}}$  is determined by two relative timescales: the ratio of loading time and constraining time, and the ratio of extrusion time and constraining time.  $\lambda$  is LEF processivity,  $d$  is LEF separation,  $l$  is the average LEF loop length (a function of  $\lambda$  and  $d$ ), and  $v$  is the extrusion speed in one direction (i.e.,  $1/2$  the total extrusion speed). (E) Larger improvement on synapsis efficiency can be achieved by reducing  $\tau_{\text{loading}}/\tau_{\text{constrained}}$  than by reducing  $\tau_{\text{extrusion}}/\tau_{\text{constrained}}$ . The data points (circles) indicates the  $P_{\text{end-joining} | \text{constrained}}$  at the separation and processivity indicated in the legend, whereas the line plots show how  $P_{\text{end-joining} | \text{constrained}}$  varies with the ratio of loading time and constraining time (left panel) and the ratio of extrusion time and constraining time (right panel), while holding the other ratio constant at the values corresponding to the circle data points.

## BE stabilization of LEFs and long-lived LEFs strongly improve synapsis efficiency

Having found that the synapsis efficiency depends most strongly on  $\tau_{\text{constrained}}$ , we first sought plausible biological mechanisms that would increase the constraining LEF lifetime.

First, we considered LEF stabilization by BEs (Fig. 4A, top panel; Supplementary Video 3). In mammalian interphase, cohesin and CTCF are the most prominent LEF and BE candidates *in vivo*, respectively. Recent work has demonstrated that CTCF may stabilize cohesin by protecting cohesin from WAPL-mediated dissociation and/or by facilitating ESCO1-mediated acetylation of cohesin, leading to an up to 20-fold increase in cohesin's residence time [49, 50]. We carried out simulations where a LEF bound to a BE exhibits a 1-, 2-, 4-, 8-, or 16-fold increased residence time. By simulations and theory (extended to include the contribution of LEF-stabilization by BEs), we



233 found that stabilization of LEFs at BEs strongly increases DSB synapsis efficiency (**Fig. 4A, Supplementary Note**  
234 **2.4.1**). The extended theory provides intuition for the process (**Supplementary Fig. 4A, B**): first, stabilization of  
235 LEFs at BEs will improve  $P_{\text{constrained}}$  since the BE-bound LEFs have a higher processivity (which increases the  
236 average loop size,  $l$ ) and results in a greater genome coverage by DNA loops (and hence the probability of a DSB  
237 occurring inside a loop); second, stabilization of LEFs at BEs increases  $\tau_{\text{constrained}}$ , and thereby prolongs the window  
238 of opportunity for gap-bridging LEFs to load and bridge the gaps, thus improving  $P_{\text{end-joining|constrained}}$  and synapsis  
239 outcome. However, stabilization of LEFs at BEs achieves increased synapsis efficiency at a cost of slower synapsis  
240 (**Supplementary Fig. 4F**). Thus, while stabilization of LEFs at BEs strongly improves synapsis efficiency, it was still  
241 insufficient (on its own) to achieve the >95% efficiency observed *in vivo* [25].

242 Second, we considered having a subpopulation of very long-lived LEFs (**Fig. 4B, top panel; Supplementary**  
243 **Video 4**). The most likely LEF candidate, cohesin, exists in multiple forms and recent work has shown that acetylated  
244 cohesin-STAG1 exhibits a much longer residence time than unacetylated cohesin-STAG1 [49]. Based on Wutz *et*  
245 *al.*, we estimate that ~30% of all cohesins could be acetylated, and exhibit up to 50-fold increase in residence time  
246 compared with the unacetylated cohesins (**Supplementary Note 3.3**). Thus, we carried out simulations where a  
247 sub-population of long-lived LEFs (5%, 10%, or 20%) exhibit 20-fold increase in processivity, and extended our  
248 analytical model accordingly (**Supplementary Note 2.4.2**). We found - both by simulations and our analytical model  
249 - that a small portion of long-lived LEFs improved the synapsis efficiency (**Fig. 4B**). The close agreement between  
250 our theoretical prediction and simulation results supports our mechanistic interpretations of long-lived LEFs' role  
251 in synapsis: the long-lived LEFs facilitate synapsis mainly by acting as constraining LEFs (**Supplementary Fig.**  
252 **4D,G**) and less frequently as gap-bridging LEFs (**Supplementary Fig. 4E,H**) [51]; the long-lived constraining LEFs  
253 provide a larger time window to attempt synapsis similar to stabilization of LEFs at BEs, as seen in the increased  
254 mean synapsis time (**Supplementary Fig. 4I**). Yet, once again, while long-lived LEFs strongly improve synapsis  
255 outcome, this mechanism is insufficient on its own to achieve the desired (> 95%) synapsis efficiency.

256 To understand the limitations of the two above proposed mechanisms, we looked at how they separately affect  
257  $P_{\text{constrained}}$  and  $P_{\text{end-joining|constrained}}$ . We found that stabilization of LEFs at BEs and long-lived LEFs can real-  
258 ize ~100%  $P_{\text{constrained}}$  (**Supplementary Fig. 4J,K**), suggesting that the failure to achieve near-perfect synapsis  
259 efficiency is due to inefficient gap-bridging by these mechanisms. We thus turned our attention to additional mech-  
260 anisms, which could potentially improve  $P_{\text{end-joining|constrained}}$ , and ultimately increase  $P_{\text{synapsis}}$ .

## 261 **DSB end stabilization of LEFs only modestly improves synapsis efficiency**

262 To identify mechanisms that facilitate the gap-bridging process (i.e. increase  $P_{\text{end-joining|constrained}}$ ), we searched  
263 for bottlenecks within the sequence of events leading to synapsis. Aside from retention of the constraining LEF, the  
264 foremost bottleneck for efficient LEF-mediated synapsis is that it requires the simultaneous bridging of the gaps on  
265 both sides of the DSB. That is, once the DNA on one side of the gap is extruded into loops (by one or more LEFs),  
266 extrusion on the other side of the DSB needs to finish before the LEFs on the first side unload (**Supplementary**  
267 **Fig. 4L**). Therefore, we reasoned that factors stabilizing the association of LEFs to the DSB can help facilitate the  
268 synapsis process (**Supplementary Video 5**).

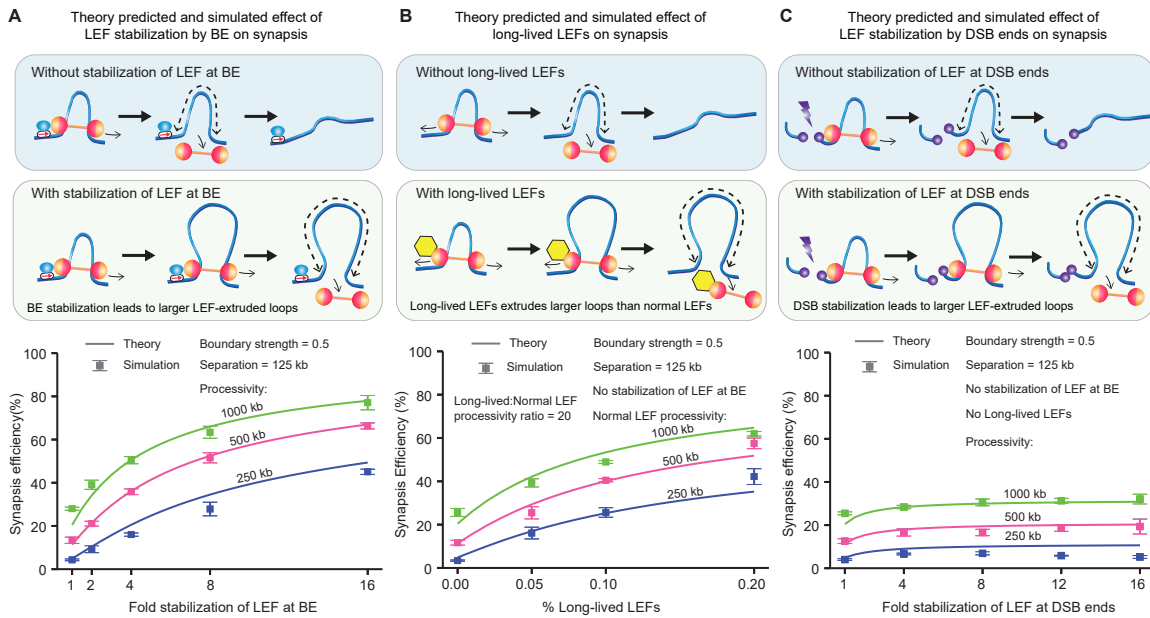

285 **Figure 4. LEF stabilization by either BEs or DSBs improve synapsis efficiency, as does the presence of long-lived LEFs**  
 286 **(A-C)** Schematic diagrams of the effects of stabilization of LEF by BE, having a small portion of long-lived LEFs, and stabilization  
 287 of LEFs by DSB (top), and the corresponding synapsis efficiency (bottom) predicted by theory (lines) or obtained from 1D  
 288 simulations (squares; The error bars represent the standard error of mean,  $n = 3$  independent simulations, with 216-218 DSB  
 289 events per simulation).

269 Recent experimental work [45] has suggested that cohesins associated with DSB ends are stabilized resulting in  
 270 increased processivity (DSB stabilization of LEFs; **Fig. 4C**, top panel), in line with our hypothesis. We thus extended  
 271 our theory to account for DSB stabilization of LEFs (**Supplementary Note 2.4.3**), and performed simulations where  
 272 a LEF in contact with a DSB end experiences a 1-, 4-, 8-, 12-, or 16-fold increase in residence time. We found that  
 273 while DSB stabilization does lead to improved synapsis outcome, the effect is much milder than stabilization of LEFs  
 274 at BEs (**Fig. 4C**, bottom panel).

275 We identified two reasons for the poor performance of DSB stabilization in increasing synapsis efficiency. First,  
 276 DSB stabilization does not modify  $P_{\text{constrained}}$  or the constraining LEF lifetime (see **Supplementary Note 2.4.3**),  
 277 which limits any efficiency gains obtained by having longer-lived gap-bridging LEFs. Moreover, DSB stabilization  
 278 only improves  $P_{\text{end-joining|constrained}}$  by reducing the pre-factor 2 in front of the two relative timescales in **Fig. 3D**  
 279 (Eq.(78)) down to 1 (in the limit of infinite-fold stabilization, **Supplementary Note 2.4.3**), which has a very modest  
 280 effect on  $P_{\text{end-joining|constrained}}$ .

281 Together, these results suggest that *maintenance* of the end products of gap-bridging (i.e. proteins that give gap-  
 282 bridging LEFs a boost in residence time) is not the bottleneck of synapsis. Instead, this suggests that *establishment*  
 283 of the end products of gap-bridging are the limiting step; this led us to search for mechanisms that accelerate the  
 284 rate of gap bridging.

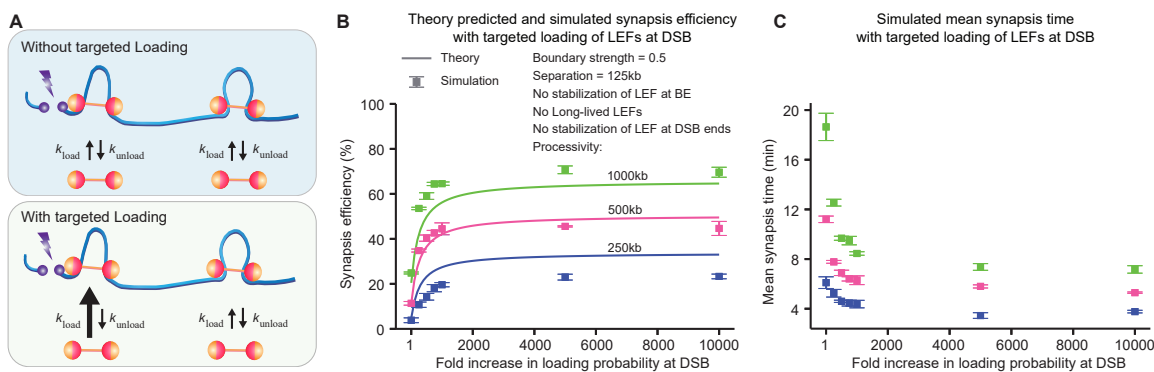

314 **Figure 5. Targeted loading of LEFs at DSB accelerates synapsis and improves synapsis efficiency.** (A) Schematic diagram  
315 of DSB synapsis without targeted loading (top panel) and with targeted loading (bottom panel). (B) Targeted loading of LEFs at  
316 DSB sites significantly improves DSB end synapsis efficiency. The error bars represent the standard error of mean,  $n = 3$   
317 independent simulations, with 216-218 DSB events per simulation. (C) Targeted loading of LEFs at DSB sites significantly  
318 reduces the mean synapsis time. Conversion of simulation time steps to synapsis time assumes total extrusion speed of 1 kb/s.  
319 The error bars represent the standard error of mean,  $n = 3$  independent simulations, with 216-218 DSB events per simulation.

## 290 Targeted loading of LEFs at DSB improves synapsis efficiency by accelerating loading of gap- 291 bridging LEFs

292 Guided by the objective of finding mechanisms that accelerate gap-bridging product formation, we arrived at the  
293 idea of increasing the loading rate of LEFs to the gap. This can be achieved through targeted loading of LEFs to the  
294 DSB ends (Fig. 4C, top panel; Supplementary Video 6). Experimental support for targeted-loading of LEFs at DSB  
295 ends come from recent studies that observed accumulation of SMC1 at DSBs sites leading to a  $\sim 2$ -10-fold cohesin  
296 enrichment at restriction-enzyme induced DSB sites [45, 52] though two other studies reported cohesin enrichment  
297 only for S/G2 cells but not G1 cells via laser induction [53, 54], suggesting that further experimental work is needed.

298 To test how targeted loading of LEFs to DSB ends aids synapsis, we implemented simulations where loading of  
299 LEFs within 1 kb of the DSB is 250-, 500-, 750-, 1000-, 5000- or 10000-fold more likely than at other similarly-sized  
300 genomic loci; this corresponded to about 5%, 9%, 13%, 17%, 50% or 67% of LEF loading events occurring at the  
301 DSB sites in our simulations. To test the physiological plausibility of these parameter values, we generated ChIP-  
302 seq-like data from our simulations for the accumulation of LEFs around the DSBs, and compared this to experimental  
303 ChIP-seq data [45]. We found good agreement between the  $\sim 2$ -fold experimental enrichment of SCC1 in the DSB-  
304 containing TADs and our simulated enrichment of LEFs (with 250X targeted loading) (Supplementary Fig. 5A,B).

305 From our simulations, we found that targeted loading of LEFs significantly improved synapsis efficiency, and  
306 that the effect saturated quickly at  $\sim 750$ -fold increased targeted loading (Fig. 5B), which corresponds to  $\sim 2.5$ -fold  
307 enrichment of LEFs in DSB-containing TADs (Supplementary Fig. 5A). We additionally extended our theoretic-  
308 al model to include the targeted loading mechanism and found consistent results (Fig. 5B). Thus, accelerated  
309 loading at DSBs makes gap-bridging LEFs more likely to finish synapsis before the constraining LEF unloads  
310 (Supplementary Note 2.4.4); this leads to higher synapsis efficiency (Fig. 5B) and lower mean-synapsis time  
311 compared with the case of no targeted loading (Fig. 5C). Nevertheless, although targeted loading increases both  
312 the speed and efficiency of synapsis and agrees with experimental data, it still falls short of the necessary  $> 95\%$   
313 synapsis efficiency seen *in vivo*.

## 320 Large scale simulations identify the parameter regime required for synapsis with near-perfect 321 efficiency

322 Thus far, we considered four extensions of the simple loop extrusion model, and found that each individually im-  
323 proves synapsis outcomes, but falls short of the >95% synapsis likely required *in vivo*. We therefore asked whether  
324 combinations of our proposed mechanisms can achieve the necessary synapsis efficiency. To test this, we carried  
325 out a systematic large-scale sweep of all 5 model parameters which included 1) the fold stabilization of LEFs at  
326 BEs, 2) the fraction of long-lived LEFs, 3) the fold stabilization of LEFs at DSB ends, 4) the fold increase in loading  
327 rate at the DSB, 5) the ratio of LEF processivity to LEF separation. This yielded a total of 768 different parameter  
328 combinations (**Fig. 6A, Supplementary Note 3**).

329 Interestingly, the synapsis efficiency of all 768 parameter combinations separated neatly along two axes (**Fig. 6B**)  
330 composed of the two relative, weighted time-scales  $(\tau_{\text{loading}}/\tau_{\text{constrained}})_{\text{weighted}}$  and  $(\tau_{\text{extrusion}}/\tau_{\text{constrained}})_{\text{weighted}}$   
331 defined by Eqs.(148)-(149) (**Supplementary Note 2.6**). This representation of our simulation results demonstrates  
332 that despite large mechanistic differences between the models, our theory identifies a universal pair of time-scales  
333 that captures the central features of the LEF-mediated DSB synapsis process.

334 We next focused on the models that achieve high synapsis efficiency, and sought to understand more mecha-  
335 nistically how our four proposed extrusion mechanisms may combine for efficient synapsis. Among the parameter  
336 combinations that met the 95% efficiency criterion, we plotted the minimum required value of each parameter (**Fig.**  
337 **6C, Supplementary Video 7**). First, we found the minimal required value for fold stabilization of LEFs at BEs  
338 was 16-fold, consistent with experimental estimates of up to 20-fold stabilization [49] (see **Supplementary Note**  
339 **3.2**). For the fraction of long-lived LEFs, we found 20% by our simulation sweep, and experimentally it is estimated  
340 that up to ~30% of cohesins are acetylated (and have a longer DNA-bound residence time, see **Supplementary**  
341 **Note 3.3**). For the fold stabilization of LEFs at DSB ends, we found the minimal required value was 2, similar to  
342 the ~2-4 range suggested by Arnould et al. [45] (see **Supplementary Note 3.4**). For the fold increase in loading  
343 probability at DSB, we needed a value of 1000 (compared to ~250 suggested by our analysis of the Arnould et  
344 al. data [45], see **Supplementary Fig. 5A**). Finally, we found that we needed a processivity/separation ratio of 2  
345 (which is within the range of ~0.3-26 suggested by Cattoglio et al. [39] and Holzmann et al. [40], see **Supplemen-**  
346 **tary Note 3.1**). We note that the three models with  $\geq 95\%$  synapsis efficiency finish synapsis within 12-14 minutes  
347 on average (assuming total extrusion speed of 1 kb/s), consistent with the 6-11 minutes synapsis time estimated  
348 from prior data [41]. While synapsis efficiency is independent of extrusion speed, synapsis time calculated from our  
349 simulations is inversely proportional to extrusion speed. For example, if we use the upper bound of experimentally  
350 observed extrusion speed of 2 kb/s instead [29], the mean synapsis time for the three models with  $\geq 95\%$  synapsis  
351 efficiency will be 6-12 minutes. Therefore, highly efficient LEF-mediated DSB end synapsis is achievable within the  
352 parameter ranges suggested by experimental data.

353 We next performed 1D polymer simulations to generate chromosome conformation capture (Hi-C)-like contact  
354 maps from the models which achieve high synapsis efficiency. Consistent with the experimental Hi-C maps re-  
355 ported by Arnould et al. [45], we find that DSBs result in an X-shaped stripe pattern in the vicinity of the break site

356 (**Supplementary Fig. 6A**). Our simulations suggest that the stripe pattern grows quickly over time and reaches a  
357 steady state by 1 hr after DSB occurrence (**Supplementary Fig. 6A**). Quantitative differences in contact frequency  
358 between our simulations and the experiments may be due to differences in simulation implementation versus exper-  
359 imental conditions (see **Methods**). Moreover, these results suggest that in order to capture the temporal dynamic  
360 changes to 3D genome structure caused by DSB formation, it is necessary to perform Hi-C at shorter time-intervals  
361 post-DSB formation (e.g. at 5 min intervals), and points to the need to have fast mechanisms of inducing DSBs at  
362 specified genomic locations to better study the effect of DSB end synapsis on 3D genome organization [55].

363 In summary, our simulations show that with experimentally plausible parameter values, loop extrusion can  
364 achieve fast and  $\geq 95\%$  efficient synapsis. We thus propose that loop extrusion plays a previously unrecognized  
365 role in mediating DSB synapsis as part of NHEJ in mammalian cells.

## 375 Discussion

376 Synapsis is the first step of DSB repair by NHEJ, which is the dominant repair pathway in the G1-phase. Synapsis  
377 has largely been assumed to occur by passive 3D diffusion [22]. However, we estimate that passive diffusion would  
378 lead to unphysiologically slow, or inefficient synapsis in mammalian nuclei.

379 Here we propose that protein-mediated DNA loop extrusion may promote fast and efficient synapsis in cells.  
380 We emphasize that loop extrusion can be a preemptive mechanism facilitating synapsis, in contrast to the reactive  
381 recruitment of DSB repair machinery after the DSB has occurred where DSB ends may diffuse apart during the  
382 recruitment period. We built a probabilistic theoretical framework by which to understand LEF-mediated DSB end  
383 synapsis. The most simplistic loop extrusion model fell short of the synapsis efficiency observed *in vivo*, but did  
384 predict synapsis timescales consistent with experimental data. Guided by our analytical theory we explored four  
385 plausible extensions to the simple loop extrusion model that constituted mechanistically distinct ways to improve  
386 synapsis outcome and tested the theory with simulations of the extrusion-mediated DSB synapsis process, finding  
387 they were in good agreement. We found that while each mechanistic extension could moderately improve synapsis  
388 efficiency above the 3-parameter model baseline, it was on combining all four mechanisms that we found a regime  
389 with  $>95\%$  synapsis efficiency. Our theory demonstrates that loop extrusion is a viable and efficient way to mediate  
390 the first step of the NHEJ process, DSB end synapsis, by co-opting the cell's chromosome organization machinery.

391 A broader role for loop extrusion in DNA repair is beginning to emerge. Recent experimental studies have  
392 proposed that DNA loop extrusion may facilitate DSB repair foci formation by mediating  $\gamma$ H2AX spreading [45,  
393 55–57] and by forming structural scaffolds with 53BP1 and RIF1 to protect DSB ends from aberrant processing  
394 [58]. In addition, loop extrusion by cohesins (one of the best studied LEFs) has been proposed to facilitate V(D)J  
395 recombination [59–61] and class switch recombination (CSR) [62] by aligning the genomic loci to be recombined  
396 after activation of the DSB machinery. Our model can be readily generalized to encompass V(D)J recombination and  
397 CSR, since V(D)J recombination and CSR can be considered as special cases of NHEJ synapsis where two instead  
398 of one DSBs are induced [11]. In addition, the proposed role of LEFs in mediating  $\gamma$ H2AX spreading is synergistic  
399 with our proposed gap-bridging mechanism (**Fig. 5**). Our work therefore provides a framework to extend, integrate,

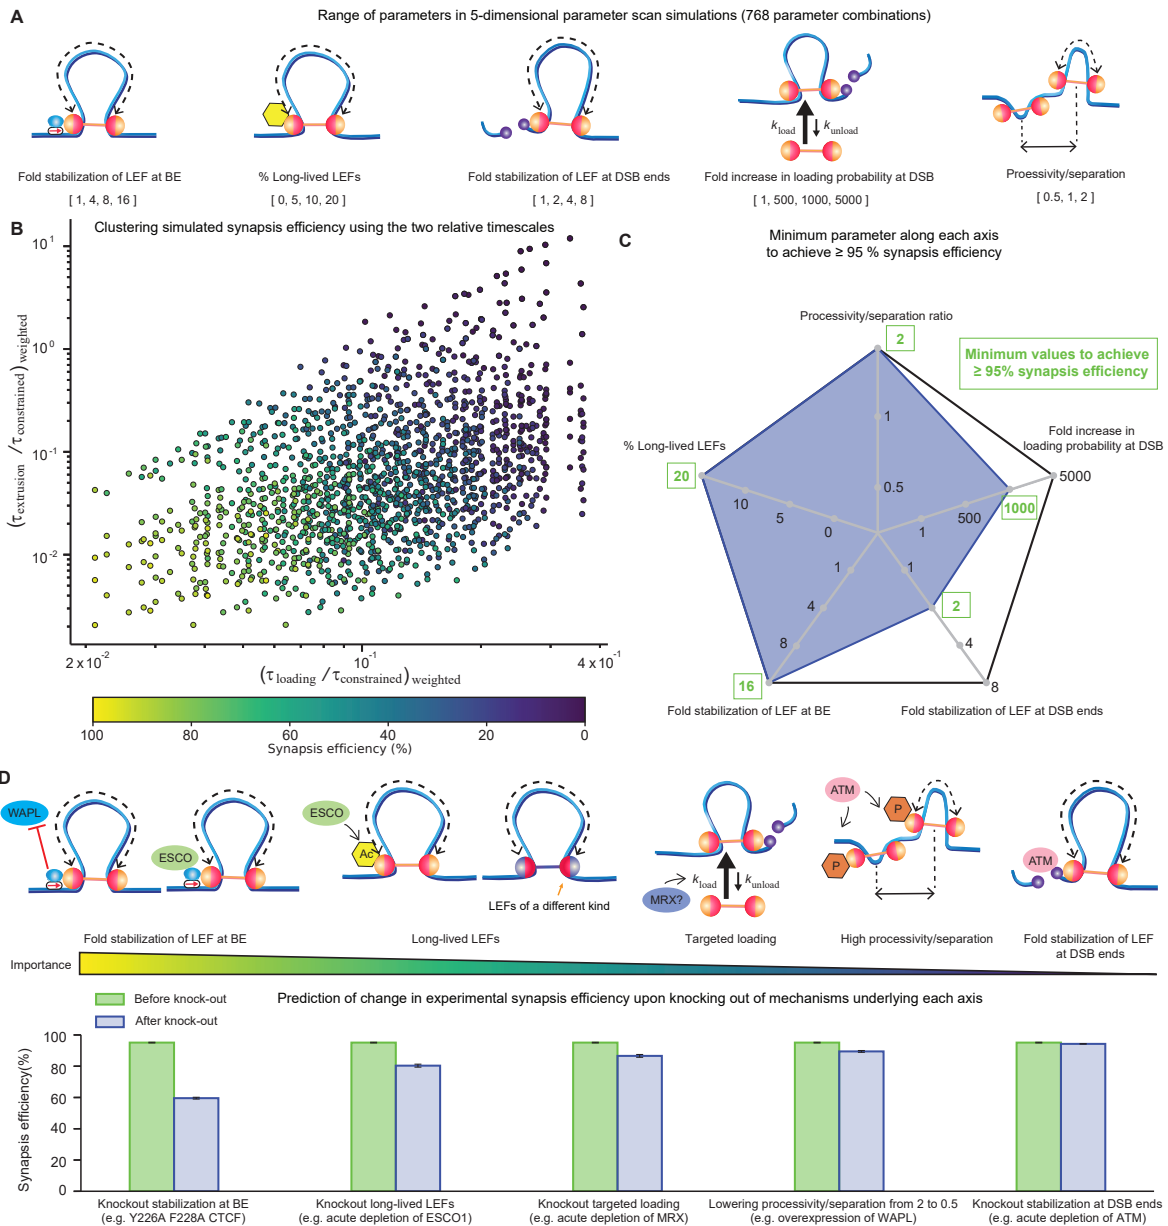

366 **Figure 6. Large scale simulations reveal a physiologically plausible parameter regime that achieves synapsis with  $\geq 95\%$**   
 367 **efficiency (A)** Parameters scanned along each of the 5 dimensions. **(B)** The two relative timescales in **Fig. 3D** can cluster the 5D  
 368 parameter scan data points based on synapsis efficiency. **(C)** Among all the parameter combinations that achieve a synapsis  
 369 efficiency average  $\geq 95\%$  ( $n = 3$  independent simulations, with 216-218 DSB events per simulation), we recorded the minimum  
 370 parameter along each of the 5 dimensions. **(D)** The 5 aspects of synapsis ranked ordered based on the predicted reduction in  
 371 synapsis efficiency upon knocking out the corresponding mechanism. Schematic diagram shows a plausible mechanistic basis  
 372 for each of the five aspects of synapsis. The bar plot shows the average synapsis efficiency before and after knocking out each of  
 373 the five mechanisms. The error bars represent the standard error of mean ( $n = 3$  different parameter combinations that achieved  
 374  $\geq 95\%$  synapsis efficiency).

400 and test several models.

401 Importantly, we note some limitations of our study. Though 3D diffusion likely occurs simultaneously and syn-  
402 ergistically with loop extrusion, we have not considered it here. First, if two DSB ends are held together by a  
403 constraining LEF, they cannot diffuse apart and would, all other things being equal, achieve faster and higher-  
404 efficiency diffusive synapsis than without a constraining LEF. Second, with diffusion, gap-bridging LEFs may not  
405 need to achieve perfect DSB end proximity. Instead, if the gap-bridging LEFs bring the DSB ends sufficiently close,  
406 3D diffusion may be sufficiently fast and reliable to mediate synapsis. Thus, our quantitative estimates of loop ex-  
407 trusion mediated synapsis should be taken as lower bounds, and we propose that loop extrusion and 3D diffusion  
408 simultaneously contribute to DSB end synapsis in cells. Finally, this study has assumed a particular set of rules by  
409 which LEFs interact with one another and other obstacles on the genome. We note, however, that as additional fea-  
410 tures of LEF-mediated extrusion come to light, such as the ability of LEFs to bypass large steric obstacles [63, 64],  
411 or each other [65, 66], one can envision extending our developed framework to account for such mechanisms.

412 We note several experimental directions worthy of further investigation that can help falsify or substantiate our  
413 model. Specifically, we identified five mechanistic features of loop extrusion that mediate efficient DSB synapsis:  
414 1) stabilization of LEFs at BEs, 2) a mixture of long-lived and short-lived LEFs, 3) high LEF processivity/separation  
415 ratio, 4) targeted loading and, 5) DSB stabilization. 1)-3) all help increase the probability of a DSB occurring inside a  
416 loop ( $P_{\text{constrained}}$ ) and the constraining LEF residence time ( $\tau_{\text{constrained}}$ ), whereas 4) and 5) both accelerate synapsis  
417 by increasing the chance of simultaneous gap-bridging on both sides of the DSB (**Fig. 3**). Crucially, these mecha-  
418 nistic extensions are all biologically plausible. First, we suggest that stabilization of LEFs at BEs could be mediated  
419 by CTCF-mediated cohesin protection from its unloader WAPL [50] or ESCO-mediated acetylation [49]. Second, we  
420 suggest that the LEF processivity/separation ratio may increase following a DSB perhaps through ATM-mediated  
421 phosphorylation of cohesin subunits SMC1 and SMC3 [67], consistent with the global stabilization of cohesins ob-  
422 served experimentally [45]. Third, long-lived LEFs may correspond to acetylated STAG1-cohesins [49], or LEFs of a  
423 different kind that exhibits higher processivity. Fourth, we suggest that targeted LEF loading at DSBs may be medi-  
424 ated by the MRX complex as knockdown of MRX led to a significant decrease in cohesin loaded at DSBs [52]. Fifth,  
425 we speculate that LEF stabilization by DSBs may be mediated by the ATM complex, which phosphorylates cohesins  
426 and accumulates cohesins in the DSB-containing TAD [45]. Finally, we note that our mechanistic understanding of  
427 loop extrusion and DSB repair is advancing rapidly, such other factors and mechanisms are likely to be found to play  
428 a role beyond the ones mentioned above.

429 To facilitate the experimental testing of our model, we used our theory and simulations to make specific and  
430 quantitative predictions (assuming that cohesin and CTCF play the main role of LEF and BE; **Fig. 6D, Supple-**  
431 **mentary Fig. 6B**). Our theory predicts that reducing  $\tau_{\text{constrained}}$  would most strongly decrease synapsis efficiency.  
432 Indeed, our simulations predict loss of stabilization of LEFs at BEs to have the strongest effect: loss of stabilization  
433 of LEFs at BEs would reduce LEF-mediated synapsis efficiency to  $\sim 60\%$ . Experimentally, this may be tested by  
434 mutating Y226 and F228 in the N-terminus of CTCF since this is predicted to eliminate CTCF-mediated stabilization  
435 of cohesin without affecting CTCF binding to DNA [50]. Next, we predict that eliminating long-lived LEFs would  
436 have the second-strongest effect, reducing LEF-mediated synapsis efficiency to  $\sim 80\%$ . For example, this could be

437 achieved through acute auxin-inducible degron (AID) depletion of ESCO1 or STAG1. Knocking out targeted loading  
438 would have the third-strongest effect, reducing LEF-mediated synapsis efficiency to  $\sim 87\%$  and drastically increasing  
439 the mean synapsis time by  $\sim 181\%$ . Experimentally, acute depletion of MRX would be one way of testing this. Lastly,  
440 although we predict lowering the processivity/separation ratio from 2 to 0.5 and knock-out of DSB stabilization to be  
441 relatively mild, reducing LEF-mediated synapsis efficiency to  $\sim 89\%$  and  $\sim 94\%$  respectively, their knock-out would  
442 slow down synapsis substantially increasing the mean synapsis time by  $\sim 67\%$  and  $\sim 39\%$ , respectively. Note that  
443 synapsis is just the first step of the NHEJ pathway, and if downstream NHEJ processes rely on a fast synapsis step,  
444 e.g. if NHEJ-related protein assembly is only stable for a limited duration, then significant slow down of synapsis  
445 due to knock-out of targeted loading and DSB stabilization could translate into even lower overall NHEJ efficiency  
446 than the predicted synapsis efficiency in **Fig. 6D**. Finally, given the high redundancy between the mechanisms con-  
447 sidered in our study, we also predicted the quantitative effect of double knock-outs and alteration of the extrusion  
448 processivity/separation (**Supplementary Fig. 6B**).

449 Broken DNA-end synapsis is a key but understudied step in DSB repair. Our theory provides a new framework  
450 for rethinking this initial step of the NHEJ process in the context of our current understanding of 3D chromosome  
451 organization by loop extrusion. In summary, we predict that DNA loop extrusion plays a previously underappreciated  
452 role in DNA repair by mediating DNA double-strand break synapsis.



## 453 **Methods**

### 454 **Time steps and lattice set-up**

455 We use a fixed-time-step Monte Carlo algorithm for 1D simulations as described in previous work [68]. Each lattice  
456 site corresponds to 1 kb of DNA, and we define the chromosome as a lattice of  $G = 2164800$  sites. Loop extruding  
457 factors (LEFs) are comprised of two motor subunits that move bidirectionally away from each other one lattice site  
458 at a time. Like most cohesin simulations [37], we assume LEFs cannot bypass each other upon encounter. LEFs  
459 also cannot extrude past the first and the last lattice sites so that LEFs do not "walk off" the chromosome.

### 460 **Boundary elements**

461 Each boundary element (BE) occupies a lattice site. BEs are directional (indicated by the red arrow in schematics)  
462 and only if the LEF motor subunit's extrusion direction is convergent with the direction of a BE, will the motor subunit  
463 be stalled by the BE with a probability equivalent to boundary strength  $b$ . Unless specified otherwise, a boundary  
464 strength of  $b = 0.5$  is used, in line with experimental estimates of CTCF binding site occupancy [39, 40]. Once a  
465 motor subunit is stalled by a BE (i.e. the subunit stopped at the BE lattice site), no further movement of the subunit  
466 is allowed until the LEF dissociates from the locus and reloads back onto the chromosome somewhere else. Only  
467 one motor subunit can occupy a BE lattice site at a time. We place BEs on the chromosome so that TADs of the  
468 sizes shown in **Fig. 2A** are achieved.

### 469 **DSB sites**

470 Each DSB site occupied two lattice sites on the chromosome, each of which corresponded to a DSB end. We  
471 introduced DSBs approximately every 10 Mb: we first randomly picked the DSB site in the very first TAD on the  
472 chromosome, and then we found the TAD 10 Mb to the right of the first DSB site, and randomly induced the second  
473 DSB in the TAD (so that the distance between DSBs and BEs were randomized), and so forth. This results in  
474 altogether 216-218 DSB sites on the chromosome. We first ran 100 thousand time steps of the 1D simulations, and  
475 then introduced all the DSBs simultaneously. After DSB occurrence, LEFs were not allowed to extrude past DSB  
476 ends. We allowed multiple motor subunits to occupy the DSB end lattice site at the same time, to enable simulations  
477 with targeted loading of LEFs to DSB sites.

### 478 **LEF association and dissociation rates**

479 All 1D simulations were performed with a fixed number of LEFs, determined by the ratio of chromosome length  $G$   
480 and LEF separation  $d$  (i.e., the inverse of LEF density). The dissociation rate was linked to the LEF processivity  
481  $\lambda$  (i.e., the average length of DNA extruded by an unobstructed LEF before it dissociates) (**Supplementary Note**  
482 **2.3.2**). After a LEF dissociates from the chromosome, it immediately and randomly reloads onto a lattice position on  
483 the chromosome that is not occupied by other LEFs' motor subunits. The only lattice sites where co-occupancy and  
484 loading of multiple LEFs were allowed is at DSB ends.

## 485 **Monitoring of synapsis events**

486 After DSBs occur, at every time step, for each DSB site, we first checked whether there was at least one LEF whose  
487 two motor subunits were on opposite sides of the DSB (i.e., whether the DSB site was constrained by at least one  
488 LEF). For the constrained DSB sites, we counted the number of lattice sites between the innermost constraining  
489 LEF that was not extruded into loops (i.e., the gap size), and if there were only 2 lattice sites (corresponding to 2 kb  
490 DNA) not extruded into loops for both gaps, we counted synapsis is being achieved and we stopped monitoring this  
491 site. We scored all DSB sites that were not initially constrained by LEFs as having failed to achieve synapsis, and  
492 did not continue monitoring these sites in later time steps.

## 493 **Modifications to LEF dynamics with additional mechanisms**

494 With stabilization of LEFs at BEs, the LEFs with at least one motor subunit at the lattice sites representing BE  
495 had  $w$ -fold reduction in dissociation rate. With stabilization of LEF at DSB ends, the LEFs with at least one motor  
496 subunit at the lattice sites representing DSB ends had  $r$ -fold reduction in dissociation rate. With a small fraction  $\alpha_o$   
497 of long-lived LEFs, the long-lived LEFs had a dissociation rate 20 fold smaller than the normal LEFs (non long-lived  
498 LEFs). When there was a subpopulation of long-lived LEFs, the separation  $d$  referred to the separation of long-lived  
499 LEFs and normal LEFs combined. With targeted loading of LEFs at DSB, the loading probability at the lattice sites  
500 representing DSB ends was  $F$  fold higher than anywhere else on the chromosome.

## 501 **Simulated ChIP-Seq data**

502 We first divided the genome into 5-kb bins, and then we counted the number of LEF motor subunits in each bin using  
503 the stored LEF positions 10 min post DSB, and wrote this to a BED file containing each bin's score (i.e. number  
504 of LEFs). Along with another BED file containing the DSB coordinates, we used the plotHeatmap command from  
505 deepTools [69] to generate the ChIP-seq heatmaps shown in **Supplementary Fig. 5B**. For the fold enrichment  
506 calculated in **Supplementary Fig. 5A**, we counted the number of LEF motor subunits in each DSB-containing TAD  
507 across the different time points, and finally normalized the average LEF subunit counts post DSB by the correspond-  
508 ing average LEF subunit counts before DSB occurrence. The boundaries of the chr20 DSB-containing TAD of Dlv4  
509 cells were determined by CTCF binding sites adjacent to the DSB site using CTCF ChIP-seq data [45].

## 510 **Data availability**

511 Simulation data are available in the GitHub repository [https://github.com/ahansenlab/DNA\\_break\\_synapsis\\_](https://github.com/ahansenlab/DNA_break_synapsis_models/tree/main/Data)  
512 [models/tree/main/Data](https://github.com/ahansenlab/DNA_break_synapsis_models/tree/main/Data).

## 513 **Code availability**

514 Simulation and analysis codes, as well as analytical theory formulated in Mathematica are available in the GitHub  
515 repository [https://github.com/ahansenlab/DNA\\_break\\_synapsis\\_models](https://github.com/ahansenlab/DNA_break_synapsis_models).

## 516 **Simulated Hi-C contact maps**

517 We first normalized the LEF positions on the lattice sites by subtracting the positions of the closest DSB sites, so  
518 that the LEF positions were all relative to the closest DSB sites. We only included LEFs that were within  $\pm 2.5$  Mb  
519 of the DSB sites. We then calculated the contact probability maps directly from the LEF positions, by utilizing a  
520 Gaussian approximation developed previously to simulate bacterial Hi-C maps [68]. Iterative correction was then  
521 applied to the calculated contact maps to generate the final contact maps [70]. Note in our 1D simulations, unlike  
522 experiments, targeted loading of LEFs to DSB ends continued even if they are already synapsed (this was so that the  
523 LEF abundance at each DSB sites did not depend on when the DSB sites are synapsed). Moreover, in experiments,  
524 the stripe pattern measured by Hi-C [45] might be weaker because certain DSBs sites could have already been  
525 synapsed/repared in a fraction of the cells, whereas we did not simulate the DNA repair process downstream of  
526 synapsis.

## 527 **Acknowledgement**

528 We thank Dr. Leonid Mirny, Dr. Ed Banigan, Dr. Thomas Graham, Dr. Assaf Amitai, Dr. Kyoko Yokomori, Dr. Miles  
529 Huseyin, Sarah Nemsick and the Hansen lab for insightful discussions and comments on the manuscript. J.Y was  
530 supported by the MathWorks Engineering Fellowship and a graduate fellowship from the Ludwig Center at MIT's  
531 Koch Institute for Integrative Cancer Research. This work was supported by the National Institutes of Health (grant  
532 numbers R00GM130896, DP2GM140938).

## 533 **Author Contributions**

534 H.B.B. conceived of the project; J.Y., H.B.B and A.S.H designed the project; J.Y. performed the research with joint  
535 guidance from H.B.B. and A.S.H; J.Y. and H.B.B. developed the theory and simulation codes with input from A.S.H.;  
536 J.Y. performed the simulations and analyses with input from H.B.B and A.S.H; J.Y. drafted the manuscript with input  
537 from H.B.B. and A.S.H. and all authors edited the manuscript.

## 538 **Competing Interests statement**

539 The authors declare that they are not aware of any conflicts that could be perceived as competing interests.

## 540 **Supplementary Information**

### 541 **Supplementary Information**

542 This file contains Supplementary Notes 1-3 and Supplementary Figures 1-6.

543 **Video 1**

544 Example of a successful synapsis event, simulated with the simple 3-parameter loop extrusion model. Simulation  
545 parameters: separation = 125 kb, processivity = 1000 kb, boundary strength = 0.5, and no mechanistic extensions.

546 **Video 2**

547 Example of a failed synapsis event, simulated with the simple 3-parameter loop extrusion model. Simulation param-  
548 eters: separation = 125 kb, processivity = 1000 kb, boundary strength = 0.5, and no mechanistic extensions.

549 **Video 3**

550 Example video of synapsis with stabilization of LEF at BE. Simulation parameters: separation = 125 kb, processivity  
551 = 250 kb, boundary strength = 0.5, fold stabilization of LEF at BE = 16, and no other mechanistic extensions.

552 **Video 4**

553 Example video of synapsis with a small fraction of long-lived LEFs. Simulation parameters: separation = 125  
554 kb, normal LEF processivity = 250 kb, boundary strength = 0.5, % long-lived LEFs = 20, long-lived:normal LEF  
555 processivity ratio = 20, and no other mechanistic extensions.

556 **Video 5**

557 Example video of synapsis with stabilization of LEF at DSB ends. Simulation parameters: separation = 125 kb,  
558 processivity = 250 kb, boundary strength = 0.5, fold increase in loading probability at DSB = 1000, and no other  
559 mechanistic extensions.

560 **Video 6**

561 Example video of synapsis with targeted loading of LEFs at DSB. Simulation parameters: separation = 125 kb,  
562 processivity = 250 kb, boundary strength = 0.5, fold stabilization of LEF at DSB ends = 4, and no other mechanistic  
563 extensions.

564 **Video 7**

565 Example video of synapsis with all four mechanistic extensions combined. Simulation parameters: separation = 125  
566 kb, normal LEF processivity = 250 kb, boundary strength = 0.5, fold stabilization of LEF at BE = 16, % long-lived  
567 LEFs = 20, long-lived:normal LEF processivity ratio = 20, fold stabilization of LEF at DSB ends = 4, and fold increase  
568 in loading probability at DSB = 1000.

## 569 References

- 570 [1] Ross, W. E. & Bradley, M. O. DNA double-strand breaks in mammalian cells after exposure to intercalating  
571 agents. *Biochimica et Biophysica Acta (BBA)-Nucleic Acids and Protein Synthesis* **654**, 129–134 (1981).
- 572 [2] Ward, J. The yield of DNA double-strand breaks produced intracellularly by ionizing radiation: a review.  
573 *International journal of radiation biology* **57**, 1141–1150 (1990).
- 574 [3] Arnould, C. & Legube, G. The secret life of chromosome loops upon DNA double-strand break. *Journal of*  
575 *molecular biology* **432**, 724–736 (2020).
- 576 [4] Chiarle, R. *et al.* Genome-wide translocation sequencing reveals mechanisms of chromosome breaks and  
577 rearrangements in B cells. *Cell* **147**, 107–119 (2011).
- 578 [5] Barlow, J. H. *et al.* Identification of early replicating fragile sites that contribute to genome instability. *Cell* **152**,  
579 620–632 (2013).
- 580 [6] Zhu, Y. *et al.* qDSB-Seq is a general method for genome-wide quantification of DNA double-strand breaks  
581 using sequencing. *Nature communications* **10**, 1–11 (2019).
- 582 [7] Vilenchik, M. M. & Knudson, A. G. Endogenous DNA double-strand breaks: production, fidelity of repair, and  
583 induction of cancer. *Proceedings of the National Academy of Sciences* **100**, 12871–12876 (2003).
- 584 [8] Qiu, Z., Zhang, Z., Roschke, A., Varga, T. & Aplan, P. D. Generation of gross chromosomal rearrangements by  
585 a single engineered DNA double strand break. *Scientific reports* **7**, 1–10 (2017).
- 586 [9] Taleei, R. & Nikjoo, H. Biochemical DSB-repair model for mammalian cells in G1 and early S phases of the  
587 cell cycle. *Mutation Research/Genetic Toxicology and Environmental Mutagenesis* **756**, 206–212 (2013).
- 588 [10] Mladenov, E., Magin, S., Soni, A. & Iliakis, G. DNA double-strand-break repair in higher eukaryotes and its  
589 role in genomic instability and cancer: Cell cycle and proliferation-dependent regulation. In *Seminars in*  
590 *cancer biology*, vol. 37, 51–64 (Elsevier, 2016).
- 591 [11] Stinson, B. M. & Loparo, J. J. Repair of dna double-strand breaks by the nonhomologous end joining pathway.  
592 *Annual Review of Biochemistry* **90** (2021).
- 593 [12] Marcomini, I. *et al.* Asymmetric processing of DNA ends at a double-strand break leads to unconstrained  
594 dynamics and ectopic translocation. *Cell reports* **24**, 2614–2628 (2018).
- 595 [13] Shrivastav, M., De Haro, L. P. & Nickoloff, J. A. Regulation of DNA double-strand break repair pathway choice.  
596 *Cell research* **18**, 134–147 (2008).
- 597 [14] Thompson, L. H. Recognition, signaling, and repair of DNA double-strand breaks produced by ionizing  
598 radiation in mammalian cells: the molecular choreography. *Mutation Research/Reviews in Mutation Research*  
599 **751**, 158–246 (2012).

- 600 [15] Krenning, L., van den Berg, J. & Medema, R. H. Life or death after a break: what determines the choice?  
601 *Molecular cell* **76**, 346–358 (2019).
- 602 [16] Aleksandrov, R. *et al.* Protein dynamics in complex dna lesions. *Molecular cell* **69**, 1046–1061 (2018).
- 603 [17] Graham, T. G., Walter, J. C. & Loparo, J. J. Two-stage synapsis of DNA ends during non-homologous end  
604 joining. *Molecular cell* **61**, 850–858 (2016).
- 605 [18] Iarovaia, O. V. *et al.* Dynamics of double strand breaks and chromosomal translocations. *Molecular cancer*  
606 **13**, 1–10 (2014).
- 607 [19] Soutoglou, E. *et al.* Positional stability of single double-strand breaks in mammalian cells. *Nature cell biology*  
608 **9**, 675–682 (2007).
- 609 [20] Roukos, V. *et al.* Spatial dynamics of chromosome translocations in living cells. *Science* **341**, 660–664 (2013).
- 610 [21] Yu, W. *et al.* Repair of G1 induced DNA double-strand breaks in S-G2/M by alternative NHEJ. *Nature*  
611 *communications* **11**, 1–15 (2020).
- 612 [22] Zhao, B., Rothenberg, E., Ramsden, D. A. & Lieber, M. R. The molecular basis and disease relevance of  
613 non-homologous DNA end joining. *Nature Reviews Molecular Cell Biology* **21**, 765–781 (2020).
- 614 [23] Zhao, B. *et al.* The essential elements for the noncovalent association of two DNA ends during NHEJ  
615 synapsis. *Nature communications* **10**, 1–12 (2019).
- 616 [24] Stinson, B. M., Moreno, A. T., Walter, J. C. & Loparo, J. J. A mechanism to minimize errors during  
617 non-homologous end joining. *Molecular cell* **77**, 1080–1091 (2020).
- 618 [25] Rothkamm, K., Kruger, I., Thompson, L. H. & Lobrich, M. Pathways of DNA double-strand break repair during  
619 the mammalian cell cycle. *Molecular and cellular biology* **23**, 5706–5715 (2003).
- 620 [26] Hanscom, T. & McVey, M. Regulation of error-prone dna double-strand break repair and its impact on genome  
621 evolution. *Cells* **9**, 1657 (2020).
- 622 [27] Alipour, E. & Marko, J. F. Self-organization of domain structures by DNA-loop-extruding enzymes. *Nucleic*  
623 *acids research* **40**, 11202–11212 (2012).
- 624 [28] Kim, Y., Shi, Z., Zhang, H., Finkelstein, I. J. & Yu, H. Human cohesin compacts DNA by loop extrusion.  
625 *Science* **366**, 1345–1349 (2019).
- 626 [29] Golfier, S., Quail, T., Kimura, H. & Brugués, J. Cohesin and condensin extrude DNA loops in a cell  
627 cycle-dependent manner. *Elife* **9**, e53885 (2020).
- 628 [30] Davidson, I. F. *et al.* DNA loop extrusion by human cohesin. *Science* **366**, 1338–1345 (2019).
- 629 [31] Hansen, A. S. CTCF as a boundary factor for cohesin-mediated loop extrusion: evidence for a multi-step  
630 mechanism. *Nucleus* **11**, 132–148 (2020).

- 631 [32] Fudenberg, G. *et al.* Formation of chromosomal domains by loop extrusion. *Cell reports* **15**, 2038–2049  
632 (2016).
- 633 [33] Sanborn, A. L. *et al.* Chromatin extrusion explains key features of loop and domain formation in wild-type and  
634 engineered genomes. *Proceedings of the National Academy of Sciences* **112**, E6456–E6465 (2015).
- 635 [34] Wang, X., Brandão, H. B., Le, T. B., Laub, M. T. & Rudner, D. Z. Bacillus subtilis SMC complexes juxtapose  
636 chromosome arms as they travel from origin to terminus. *Science* **355**, 524–527 (2017).
- 637 [35] Davidson, I. F. & Peters, J.-M. Genome folding through loop extrusion by SMC complexes. *Nature Reviews*  
638 *Molecular Cell Biology* **22**, 445–464 (2021).
- 639 [36] Ganji, M. *et al.* Real-time imaging of DNA loop extrusion by condensin. *Science* **360**, 102–105 (2018).
- 640 [37] Banigan, E. J. & Mirny, L. A. Loop extrusion: theory meets single-molecule experiments. *Current opinion in*  
641 *cell biology* **64**, 124–138 (2020).
- 642 [38] Goloborodko, A., Marko, J. F. & Mirny, L. A. Chromosome compaction by active loop extrusion. *Biophysical*  
643 *journal* **110**, 2162–2168 (2016).
- 644 [39] Cattoglio, C. *et al.* Determining cellular CTCF and cohesin abundances to constrain 3D genome models. *Elife*  
645 **8**, e40164 (2019).
- 646 [40] Holzmann, J. *et al.* Absolute quantification of cohesin, CTCF and their regulators in human cells. *Elife* **8**,  
647 e46269 (2019).
- 648 [41] Taleei, R. & Nikjoo, H. Repair of the double-strand breaks induced by low energy electrons: a modelling  
649 approach. *International journal of radiation biology* **88**, 948–953 (2012).
- 650 [42] Amitai, A. & Holcman, D. Diffusing polymers in confined microdomains and estimation of chromosomal  
651 territory sizes from chromosome capture data. *Physical review letters* **110**, 248105 (2013).
- 652 [43] Tiana, G. *et al.* Structural fluctuations of the chromatin fiber within topologically associating domains.  
653 *Biophysical journal* **110**, 1234–1245 (2016).
- 654 [44] Miné-Hattab, J. & Rothstein, R. Increased chromosome mobility facilitates homology search during  
655 recombination. *Nature cell biology* **14**, 510–517 (2012).
- 656 [45] Arnould, C. *et al.* Loop extrusion as a mechanism for formation of DNA damage repair foci. *Nature* **590**,  
657 660–665 (2021).
- 658 [46] Dixon, J. R. *et al.* Topological domains in mammalian genomes identified by analysis of chromatin  
659 interactions. *Nature* **485**, 376–380 (2012).
- 660 [47] Lévy-Leduc, C., Delattre, M., Mary-Huard, T. & Robin, S. Two-dimensional segmentation for analyzing Hi-C  
661 data. *Bioinformatics* **30**, i386–i392 (2014).

- 662 [48] Shin, H. *et al.* TopDom: an efficient and deterministic method for identifying topological domains in genomes.  
663 *Nucleic acids research* **44**, e70–e70 (2016).
- 664 [49] Wutz, G. *et al.* ESCO1 and CTCF enable formation of long chromatin loops by protecting cohesinSTAG1 from  
665 WAPL. *Elife* **9**, e52091 (2020).
- 666 [50] Li, Y. *et al.* The structural basis for cohesin–CTCF-anchored loops. *Nature* **578**, 472–476 (2020).
- 667 [51] Banigan, E. J. & Mirny, L. A. The interplay between asymmetric and symmetric dna loop extrusion. *Elife* **9**,  
668 e63528 (2020).
- 669 [52] Cheblal, A. *et al.* DNA damage-induced nucleosome depletion enhances homology search independently of  
670 local break movement. *Molecular Cell* **80**, 311–326 (2020).
- 671 [53] Kim, J.-S., Krasieva, T. B., LaMorte, V., Taylor, A. M. R. & Yokomori, K. Specific recruitment of human cohesin  
672 to laser-induced DNA damage. *Journal of Biological Chemistry* **277**, 45149–45153 (2002).
- 673 [54] Kong, X. *et al.* Distinct functions of human cohesin-SA1 and cohesin-SA2 in double-strand break repair.  
674 *Molecular and cellular biology* **34**, 685–698 (2014).
- 675 [55] Liu, Y. *et al.* Very fast CRISPR on demand. *Science* **368**, 1265–1269 (2020).
- 676 [56] Li, K., Bronk, G., Kondev, J. & Haber, J. E. Yeast ATM and ATR kinases use different mechanisms to spread  
677 histone H2A phosphorylation around a DNA double-strand break. *Proceedings of the National Academy of*  
678 *Sciences* **117**, 21354–21363 (2020).
- 679 [57] Collins, P. L. *et al.* Dna double-strand breaks induce h2ax phosphorylation domains in a contact-dependent  
680 manner. *Nature communications* **11**, 1–9 (2020).
- 681 [58] Ochs, F. *et al.* Stabilization of chromatin topology safeguards genome integrity. *Nature* **574**, 571–574 (2019).
- 682 [59] Zhang, Y. *et al.* The fundamental role of chromatin loop extrusion in physiological V (D) J recombination.  
683 *Nature* **573**, 600–604 (2019).
- 684 [60] Ba, Z. *et al.* CTCF orchestrates long-range cohesin-driven V (D) J recombinational scanning. *Nature* **586**,  
685 305–310 (2020).
- 686 [61] Dai, H.-Q. *et al.* Loop extrusion mediates physiological Igh locus contraction for RAG scanning. *Nature* **590**,  
687 338–343 (2021).
- 688 [62] Zhang, X. *et al.* Fundamental roles of chromatin loop extrusion in antibody class switching. *Nature* **575**,  
689 385–389 (2019).
- 690 [63] Brandão, H. B. *et al.* RNA polymerases as moving barriers to condensin loop extrusion. *Proceedings of the*  
691 *National Academy of Sciences* **116**, 20489–20499 (2019).



- 692 [64] Pradhan, B. *et al.* SMC complexes can traverse physical roadblocks bigger than their ring size. *bioRxiv* (2021).
- 693 [65] Brandão, H. B., Ren, Z., Karaboja, X., Mirny, L. A. & Wang, X. DNA-loop-extruding SMC complexes can  
694 traverse one another in vivo. *Nature Structural & Molecular Biology* 1–10 (2021).
- 695 [66] Kim, E., Kerssemakers, J., Shaltiel, I. A., Haering, C. H. & Dekker, C. DNA-loop extruding condensin  
696 complexes can traverse one another. *Nature* **579**, 438–442 (2020).
- 697 [67] Kim, S.-T., Xu, B. & Kastan, M. B. Involvement of the cohesin protein, SMC1, in ATM-dependent and  
698 independent responses to DNA damage. *Genes & Development* **16**, 560–570 (2002).
- 699 [68] Banigan, E. J., van den Berg, A. A., Brandão, H. B., Marko, J. F. & Mirny, L. A. Chromosome organization by  
700 one-sided and two-sided loop extrusion. *Elife* **9**, e53558 (2020).
- 701 [69] Ramírez, F. *et al.* deeptools2: a next generation web server for deep-sequencing data analysis. *Nucleic acids*  
702 *research* **44**, W160–W165 (2016).
- 703 [70] Imakaev, M. *et al.* Iterative correction of Hi-C data reveals hallmarks of chromosome organization. *Nature*  
704 *methods* **9**, 999–1003 (2012).

## Supplementary Information for: DNA double-strand break end synapsis by DNA loop extrusion

Jin Yang<sup>1,2</sup>, Hugo B. Brandão<sup>1,2,\*</sup>, and Anders S. Hansen<sup>1,2,\*</sup>

<sup>1</sup>*Department of Biological Engineering, Massachusetts Institute of Technology, Cambridge, 02142*

<sup>2</sup>*The Broad Institute of Harvard and MIT, Cambridge, 02142*

\**Corresponding authors: Hugo B. Brandão (hbrandao@mit.edu); Anders S. Hansen (ashansen@mit.edu)*

### Contents

|          |                                                                                                                                       |           |
|----------|---------------------------------------------------------------------------------------------------------------------------------------|-----------|
| <b>1</b> | <b>Supplementary Note 1</b>                                                                                                           | <b>2</b>  |
| 1.1      | Estimation of the mean synapsis time for diffusion mediated synapsis . . . . .                                                        | 2         |
| 1.2      | Estimation of the synapsis efficiency for diffusion mediated synapsis . . . . .                                                       | 2         |
| <b>2</b> | <b>Supplementary Note 2</b>                                                                                                           | <b>3</b>  |
| 2.1      | The probability of synapsis mediated by loop-extruding factors . . . . .                                                              | 3         |
| 2.2      | The probability of DSB ends being constrained . . . . .                                                                               | 4         |
| 2.2.1    | Simplified expression for the probability of DSB ends being constrained . . . . .                                                     | 9         |
| 2.3      | The probability of end joining given that DSB ends are constrained . . . . .                                                          | 9         |
| 2.3.1    | The gap-bridging time distribution . . . . .                                                                                          | 9         |
| 2.3.1.1  | The loading time distribution . . . . .                                                                                               | 9         |
| 2.3.1.2  | The extrusion time distribution . . . . .                                                                                             | 10        |
| 2.3.1.3  | Computing the gap-bridging time distribution through convolution . . . . .                                                            | 10        |
| 2.3.2    | The constraining LEF lifetime distribution . . . . .                                                                                  | 11        |
| 2.3.3    | The probability of gap-bridging on one side of the DSB . . . . .                                                                      | 11        |
| 2.3.4    | Simultaneous gap-bridging on both sides of the DSB and the gap-bridging LEF lifetime distribution . . . . .                           | 12        |
| 2.3.5    | Computing the probability of joining DSB ends given DSB ends are constrained . . . . .                                                | 13        |
| 2.3.6    | Simplified expression for the probability of end-joining given the DSB is constrained and two important relative timescales . . . . . | 15        |
| 2.4      | Synapsis with additional mechanisms . . . . .                                                                                         | 16        |
| 2.4.1    | Synapsis with stabilized LEFs by BEs . . . . .                                                                                        | 16        |
| 2.4.2    | Synapsis with a small fraction of long-lived LEFs . . . . .                                                                           | 19        |
| 2.4.3    | Synapsis with LEFs stabilized by DSB ends . . . . .                                                                                   | 20        |
| 2.4.4    | Synapsis with targeted loading of LEFs to DSB ends . . . . .                                                                          | 22        |
| 2.4.5    | Synapsis with all four mechanisms combined . . . . .                                                                                  | 23        |
| 2.5      | Simplified expression for the probability of synapsis with four additional mechanisms . . . . .                                       | 25        |
| 2.6      | Two important relative timescales underpinning synapsis efficiency . . . . .                                                          | 26        |
| 2.7      | Limitations of our analytical theory . . . . .                                                                                        | 27        |
| 2.8      | Conclusion . . . . .                                                                                                                  | 28        |
| <b>3</b> | <b>Supplementary Note 3</b>                                                                                                           | <b>29</b> |
| 3.1      | Estimation of the range of LEF separation and processivity . . . . .                                                                  | 29        |
| 3.2      | Estimation of the fold increase in LEF lifetime upon stabilization by BEs . . . . .                                                   | 30        |
| 3.3      | Estimation of the fraction and lifetime of long-lived LEFs . . . . .                                                                  | 30        |
| 3.4      | Estimation of the fold increase in LEF lifetime upon stabilization by DSB ends . . . . .                                              | 31        |
| 3.5      | Estimation of the fold increase in LEF loading probability at DSB . . . . .                                                           | 31        |
| <b>4</b> | <b>Supplementary Figures</b>                                                                                                          | <b>33</b> |

## 1 Supplementary Note 1

### Overview

DNA Double-Strand Break (DSB) synapsis is generally assumed to be mediated by passive 3D diffusion [1]. However, due to the experimental difficulty associated with monitoring the spatio-temporal kinetics of the DSB repair process at a single locus in live mammalian cells by NHEJ (i.e. starting with DSB induction through synapsis and repair) [2], there has not been direct *in vivo* evidence indicating DSB synapsis is mediated solely by 3D diffusion.

DSB synapsis step can be described as a two-stage process [3–5]: the two DSB ends are first brought into proximity in a long-range (LR) synaptic complex, in which the two DSB ends are held  $\sim 11.5$  nm apart; the LR synaptic complex is then transitioned to a short-range (SR) synaptic complex that ligates the two DSB ends. While much has been uncovered about the processes downstream to the formation of the LR complex, comparatively less is known about the initial engagement of the two DSB ends, i.e., how the two DSB ends are brought into proximity in the LR complex in the first place. In our study, we use the term, synapsis, to refer to the process starting with DSB occurrence to the initial engagement of the two DSB ends in the LR synaptic complex. Given that autophosphorylation of the catalytic subunit of the DNA-dependent protein kinase (DNA-PKcs) is suggested to signal the transition from the LR to SR synaptic complex [4], the average synapsis time can be estimated around 6-11 minutes in mammalian cells based on prior experimental data [6]. To see if 3D diffusion is consistent with an average synapsis time of 6-11 minutes, we used an analytical formula for our calculations [7]. Based on [7], we estimate that synapsis would take on average between 20 to 90 minutes if mediated by passive 3D diffusion in chromosomes organized by SMC complexes into loops of average size  $\sim 250$  kb.

This raises a crucial point: assuming that loop extrusion contributes to DSB end synapsis through the combined action of constraining LEFs and gap-bridging LEFs as we propose, all current experimental estimates in mammalian cells already indirectly take into account the effects of loop extrusion. However, the speed and reliability of DSB end synapsis by pure 3D diffusion without the action of loop extrusion has then never been estimated before, and therefore the true efficiency of DSB end synapsis by pure 3D diffusion remains unknown.

The synapsis estimates based on pure 3D diffusion are significantly larger than the average synapsis time of 6-11 minutes in mammalian cells estimated from experimental data. Further, given that normal metabolism causes  $\sim 1$ -50 DSBs per human cell per day [8, 9], in the nuclear “soup” of DSB ends, 3D diffusion alone cannot ensure the correct pairing of DSB ends. This points to the possibility of alternative mechanisms, beyond passive 3D diffusion, that help mediate DSB synapsis. The calculation of the DSB synapsis rates (and its limitations) using the analytical formula are described below.

### 1.1 Estimation of the mean synapsis time for diffusion mediated synapsis

After a DSB occurs, recruitment of repair factors is initiated. However fast the recruitment process is, this duration of time gives the two DSB ends the opportunity to separate by diffusion. Indeed, experiments show that DSB ends can diffuse apart by several hundred nanometers [2, 10]. We asked whether 3D diffusion would be sufficient to bring the separated DSB ends back together within physiological time scales. Amitai and Holcman [7] derived an analytical formula to calculate the mean time,  $\langle \tau_h \rangle$ , for diffusion mediated synapsis in a confined volume:

$$\langle \tau_h \rangle = \frac{\sqrt{2}}{4\pi\epsilon D_{\text{chromatin}}} \left[ \frac{4\pi N_{\text{monomer}}}{N_{\text{monomer}}^2 \gamma + \pi^2 \kappa} + \frac{4}{\sqrt{\kappa\gamma}} \cdot \left[ \frac{\pi}{2} - \tan^{-1}(2\sqrt{\kappa/\gamma} \tan(\pi/2 N_{\text{monomer}})) \right] \right]^{3/2} + \mathcal{O}(1). \quad (1)$$

The encounter radius,  $\epsilon$ , is the 3D distance the DSB ends must achieve in order for synapsis; here, we estimate  $\epsilon = 11.5 \pm 0.4$  nm based on crystallographic models of the long-range synaptic complex that is thought to bring the two DSB ends into proximity [4, 5]; the uncertainty in our estimate comes from the resolution uncertainty associated with the crystal structure. The diffusion coefficient of chromatin in mammalian chromosomes has been estimated to be  $D_{\text{chromatin}} = (4 \pm 1.9) \times 10^{-3}$   $\mu\text{m}^2/\text{s}$  [11]. The number of monomers used to discretize the chromosome was calculated as,  $N_{\text{monomer}} = 2500$ , by assuming chromatin “monomers” of  $\delta \approx 30$  nm fiber and that the DSB occurs inside of a loops of an average size of 250 kb, and using 0.3 nm/bp [12].  $\gamma = \frac{12}{R^4 \delta^2 + 2R^2}$  is a parameter dependent on the confinement radius  $R$  and the standard deviation of the distance between adjacent monomers  $\delta$  [7]. Here we use a confinement radius of  $R = 990 \pm 90$  nm calculated from a broken locus in yeast [13], in agreement with another independent study [14], which is about twice of the confinement radius without a DSB [12–14].  $\kappa = 3/\delta^2$  is the spring constant.  $\mathcal{O}(1)$  is a constant error term. Given the aforementioned range of the chosen parameters, the mean synapsis time for synapsis driven by diffusion was calculated to be about 20-90 minutes.

### 1.2 Estimation of the synapsis efficiency for diffusion mediated synapsis

With the average synapsis time of  $\langle t_{\text{expt}} \rangle \approx 6 - 11$  min and synapsis efficiencies estimated from experimental data  $P_{\text{synapsis,experiment}} \approx 95\%$ , we can estimate (as a first-order approximation) the upper bound on the total synapsis

time,  $t_{\text{upper}}$ , allowed by a cell:

$$P_{\text{synapsis,experiment}} = 1 - e^{-\frac{t_{\text{upper}}}{\langle t_{\text{expt}} \rangle}}$$

By setting  $P_{\text{synapsis,experiment}} = 0.95$ , and letting  $\langle t_{\text{expt}} \rangle = 11$  min, we get  $\langle t_{\text{upper}} \rangle \approx 33$  min as an estimate for the upper bound on time afforded by the cell to fix a DSB. Then, we can ask - given  $\tau_{\text{upper}} = 33$  min, how much does our calculated estimate for the first-passage time due to 3D diffusion decrease the probability of synapsis? Thus,

$$P_{\text{synapsis,3D diffusion}} = 1 - e^{-\frac{t_{\text{upper}}}{\langle t_{\text{3D diffusion}} \rangle}}$$

where  $\langle t_{\text{3D diffusion}} \rangle \approx 20 - 90$  min as calculated above. This calculation results in  $P_{\text{synapsis,3D diffusion}} \approx 30 - 80\%$ , suggesting that 3D diffusion alone is too error prone (i.e. failing  $\sim 20\% - 70\%$  of the time) to be consistent with the experimentally determined synapsis efficiency.

We end by emphasizing that essentially all of the above parameters are associated by great uncertainty and that our estimate therefore is too. Moreover, the above calculation assumes an equilibrium distribution of starting positions for the DSB ends, where as in a real system, the initial condition is that the two DSB ends are in close physical proximity. This assumption may partially reduce the first-passage times. However, the estimated  $\sim 30 - 80\%$  synapsis efficiency mediated by 3D diffusion above suggest that a purely diffusion driven synapsis mechanism is likely to be too error prone to be consistent with the  $> 95\%$  efficiency of synapsis and NHEJ observed in mammalian cells.

## 2 Supplementary Note 2

### Overview

To understand how the probability of DSB synapsis is affected by loop extruding factors (LEFs), we developed a probability theory framework for the process and used it to derive an analytical solution for the probability of synapsis. Briefly, we focus on the repair of DNA DSBs by non-homologous end joining (NHEJ). NHEJ repair involves two steps. First, the two DSB ends must be brought into proximity (synapsis). Second, they must be ligated back together. Here we focus on the first step, DSB synapsis. Please note that our goal is not to obtain the most precise analytical expression, but rather to derive a sufficiently accurate expression that we can use to obtain mechanistic intuition for how various loop extrusion mechanisms and parameters affect the efficiency of synapsis. Therefore we make approximations whenever necessary to simplify the mathematical form.

We first consider how the simplest loop extrusion model, which involves just 3 parameters, may facilitate DSB synapsis. After that, we extend this simple model by adding the four individual mechanisms discussed in the main text that improve synapsis efficiency: LEF stabilization by boundary elements (BEs); the presence of a subpopulation of long-lived LEFs; LEF stabilization by the DSB ends; and targeted loading of LEFs at DSB ends. Finally, we derive an analytical expression that combines all four additional mechanisms.

We note that our theory does not consider the effect of passive diffusion. Since passive 3D diffusion likely contributes to synapsis in cells in a manner that is synergistic with loop extrusion, we note that our estimates of DSB synapsis efficiencies should be considered lower bounds.

### 2.1 The probability of synapsis mediated by loop-extruding factors

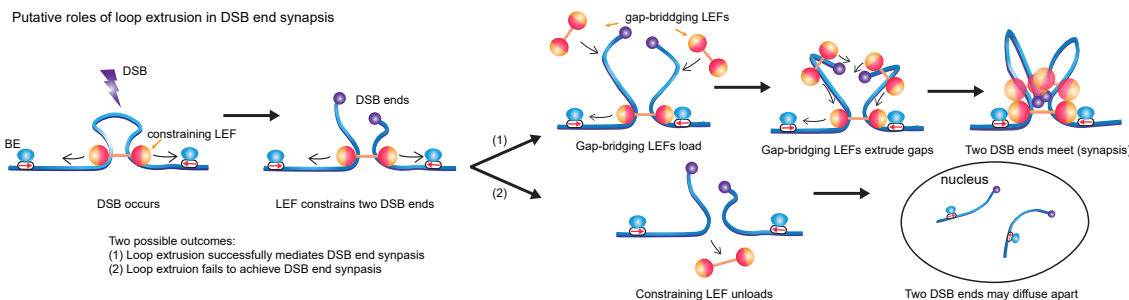

**Supplementary Note 2 Figure 1. Pathway for successful LEF-mediated DSB synapsis.** (1) Loop extrusion may facilitate successful DSB end synapsis in two steps: (i) the constraining LEF prevents the two DSB ends from diffusing apart after DSB and (ii) additional gap-bridging LEFs loaded within the loop extruded by constraining LEF can extrude sub-loops to bring the two DSB ends into proximity (2) If the constraining LEF falls off before the two DSB ends are brought into proximity by gap bridging LEFs, the two DSB ends may diffuse apart. In our simulations, we assume synapsis always fails once no constraining LEF remains for a given DSB.

We describe a general form for the probability of synapsis mediated by LEFs,  $P_{\text{synapsis}}$ . For the purpose of understanding the limitations of what LEFs can and cannot do for synapsis, we omit contributions from 3D diffusion in all subsequent calculations of  $P_{\text{synapsis}}$ .

Therefore, in order for LEF-mediated synapsis to happen, at least one constraining LEF must reside over the DSB site at the time when the DSB occurs. We denote the probability of having at least one constraining LEF as  $P_{\text{constrained}}$ , which can be calculated as the probability that the DSB occurs inside a DNA loop extruded by a LEF. If the condition of having at least one constraining LEF over the DSB is met (**Supplementary Note 2 Figure 1, left**), then additional LEFs loaded into the gap between the DSB and the edges of the constraining LEF can extrude loops to bring the DSB ends into proximity to achieve synapsis (**Supplementary Note 2 Figure 1 path (1)**). We refer to this process as gap-bridging and the LEFs that mediate gap-bridging as gap-bridging LEFs. We note that at least one constraining LEF needs to remain throughout the gap-bridging process until synapsis is simultaneously achieved on both sides. If the constraining LEF dissociates before gap-bridging on both sides is achieved, we assume that the two DSBs ends can diffuse apart, and we consider this a failed LEF-mediated synapsis event (**Supplementary Note 2 Fig. 1 path (2)**). We denote the conditional probability of finishing gap-bridging given that the DSB ends are constrained at the time of DSB occurrence as  $P_{\text{end-joining|constrained}}$ .

Thus, the probability of synapsis,  $P_{\text{synapsis}}$ , can then be expressed as the product of  $P_{\text{constrained}}$  and  $P_{\text{end-joining|constrained}}$ :

$$P_{\text{synapsis}} = P_{\text{constrained}} \cdot P_{\text{end-joining|constrained}} \quad (2)$$

In the following sections, we derive analytical estimates for both  $P_{\text{constrained}}$  and  $P_{\text{end-joining|constrained}}$ .

## 2.2 The probability of DSB ends being constrained

As stated above,  $P_{\text{constrained}}$  is simply the probability that the DSB occurs inside a DNA loop such that the broken DSB ends remain constrained by at least one LEF. Since we assume that DSBs occur homogeneously throughout the genome,  $P_{\text{constrained}}$  is equivalent to the fraction of the genome that is extruded into loops by LEFs. For the scenario without BEs, the fraction of the genome inside loops can be estimated by considering the nesting of LEFs [15]:

$$P_{\text{constrained,noBEs}} = 1 - e^{-\frac{l}{d}} \quad (3)$$

where  $l$  is the average DNA loop size, and  $d$  is the LEF separation, i.e., the average linear distance between LEF loading sites. This expression accounts for the increasing chance of LEFs loaded into existing loops and thus not contributing to increasing the fraction of genome inside loops.

To incorporate the effect of BEs on  $P_{\text{constrained}}$ , we account for how BEs decrease the amount of DNA that is inside loops by prematurely stalling LEFs. Therefore, the fraction of genome extruded into loops becomes:

$$P_{\text{constrained}} = P_{\text{constrained,noBEs}} \cdot (1 - P_{\text{unextruded,BEStalling}}) \quad (4)$$

where  $P_{\text{unextruded,BEStalling}}$  is the probability of DNA becoming unextruded (i.e. unlooped) due to stalling of LEFs at BEs.

To calculate  $P_{\text{unextruded,BEStalling}}$ , we adapted the mean-field theoretical model previously derived by Banigan and Mirny [16] for the fraction of genome coverage by loops. Therefore,

$$\frac{(1 - P_{\text{unextruded,BEStalling}}) \cdot G_{\text{loop,noBEs}}}{N_p} = l \quad (5)$$

$$N_p l + N_p \cdot \sum_{\{i\}} f_{\text{unextruded},i} \cdot l_{\text{unextruded},i} = G_{\text{loop,noBEs}} \quad (6)$$

where  $G_{\text{loop,noBEs}}$  is the average length of genome inside loops with no BEs present, and thus if the total genome length is  $G$ ,  $G_{\text{loop,noBEs}} = G \cdot P_{\text{constrained,noBEs}}$ . The fraction of  $G_{\text{loop,noBEs}}$  that remains looped in the presence of BEs is given by  $1 - P_{\text{unextruded,BEStalling}}$ .  $N_p$  is the total number of parent loops as defined in [16] (i.e. it is the total number of loops minus the number that exist within a larger loop).  $f_{\text{unextruded},i}$  is the probability of adjacent parent LEFs being in a state  $i$ , where the set of possible  $\{i\}$  constitutes all configurations of two adjacent LEFs and BEs which result in unextruded DNA between the LEFs because of the presence of BEs (see **Supplementary Note 2 Figure 2**). Finally,  $l_{\text{unextruded},i}$  is the average length of unextruded DNA for the configuration  $i$ . Here the size of parent loops are approximated as the average loop size of all LEFs. Combining Eqs.(5)-(6), we can solve for  $P_{\text{unextruded,BEStalling}}$ :

$$P_{\text{unextruded,BEStalling}} = 1 - \frac{1}{1 + \frac{\sum_{\{i\}} f_{\text{unextruded},i} \cdot l_{\text{unextruded},i}}{l}} \quad (7)$$

The unknown quantities now become  $f_{\text{unextruded},i}$  and  $l_{\text{unextruded},i}$  which we can calculate by enumerating the types of configurations which lead unextruded DNA because of a BE (**Supplementary Note 2 Figure 2**). Instead of

explicitly enumerating and calculating all the possible configurations, we take a mean field approach and consider the leading three configurations (**Supplementary Note 2 Figure 2**) as being representative of the much larger space of configurations.

We first consider the case where the loading sites of two adjacent LEFs are separated by a BE (i.e. are in adjacent topologically associated domains, (TADs)). We refer to this case as Configuration I. In our mean field approach, this scenario arises if the average distance between the BE and the loading site of LEFs (i.e.  $\frac{d}{2}$ ) is smaller than the TAD size,  $D$ , i.e.  $\frac{d}{2} \leq D$  (**Supplementary Note 2 Fig. 2A**). In this case, unextruded DNA arises if and only if one LEF is stalled by BEs and the other LEF fails to reach BE. The probability of a LEF motor subunit being stalled by BEs can be estimated by the fraction,  $\frac{[\text{BE-LEF}]}{[\text{LEF}_o]}$ , where  $[\text{BE-LEF}]$  is the concentration of stalled LEF-BE complexes and  $[\text{LEF}_o]$  is the total density of LEF motor subunits extruding in one direction:

$$[\text{LEF}_o] = \frac{1}{d} \quad (8)$$

Thus the overall fraction of LEFs in *Configuration I* can be calculated as the following:

$$f_{\text{unextruded, Configuration I}} = 2 \frac{[\text{BE-LEF}]}{[\text{LEF}_o]} P(M < \frac{d}{2}) \quad (9)$$

where  $M$  is the random variable representing the extrusion distance of one LEF motor subunit before the LEF unloads. The pre-factor of 2 accounts for the fact that the LEF stalled by BE could be either on the left or on the right of the BE. If we assume  $M$  is exponentially distributed, since each LEF motor subunit (a LEF is composed of two subunits) on average travels  $l/2$ , then  $M \sim \text{Exp}(l/2)$ . Thus the probability that  $M$  is smaller than  $\frac{d}{2}$  can be calculated as:

$$\begin{aligned} P(M < \frac{d}{2}) &= \int_0^{d/2} \frac{2}{l} \cdot \exp(-\frac{2}{l} \cdot m) dm \\ &= 1 - \exp(-\frac{d}{l}). \end{aligned} \quad (10)$$

The corresponding average unextruded DNA length can be calculated as the following (**Supplementary Note 2 Fig. 2A**):

$$\begin{aligned} l_{\text{unextruded, Configuration I}} &= \frac{d}{2} - \int_0^{d/2} \frac{2}{l} m \cdot \exp(-\frac{2}{l} \cdot m) dm \\ &= \frac{d}{2} - \frac{1}{2} (l - (d+l)\exp(-\frac{d}{l})). \end{aligned} \quad (11)$$

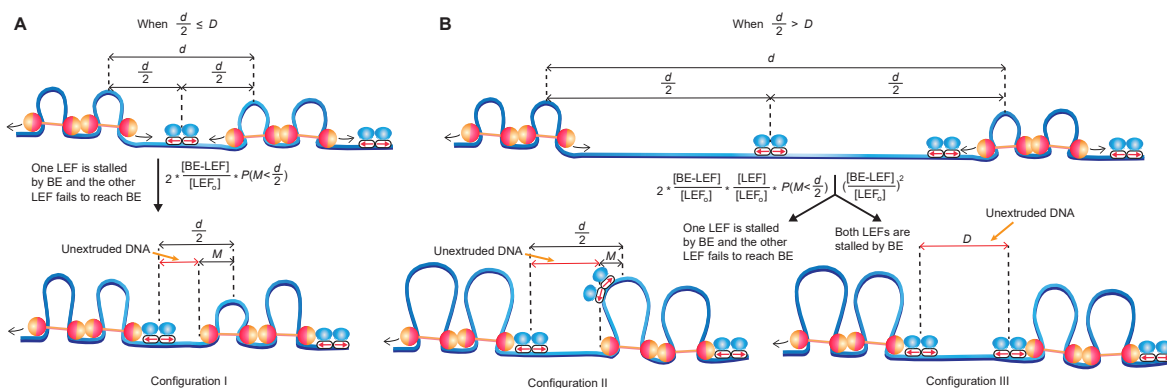

**Supplementary Note 2 Figure 2. BE stalling can generate three types of LEF pair configurations leading to unextruded DNA.** (A) When  $\frac{d}{2} \leq D$ , the loading sites of the LEF pair are in adjacent TADs, separated by a distance of  $d$ . On average, the BE is equidistant to both LEF loading sites. Unextruded DNA arises if and only if one LEF is stalled by BE and the other LEF fails to reach BE, leading to an unextruded segment of average length calculated in Eq.(11). (B) When  $\frac{d}{2} > D$ , the loading sites of the LEF pair are separate by a TAD. Unextruded DNA can arise with two different LEF pair configurations. The first configuration is identical to the configuration in (A), which occurs when one LEF is stalled by BE, and the other LEF is not stalled by the additional BE in between but fails to reach the leftmost BE. The second configuration occurs when both LEFs are stalled by BEs, resulting in an unextruded segment with the same length as the TAD size.

Next we consider the cases where the loading sites of the adjacent LEFs are separated by a TAD (i.e. two BEs). This occurs when  $\frac{d}{2} > D$ . There are altogether two such types of configurations which we call Configuration II and

Configuration III. Configuration II, occurs when one LEF is stalled by one of the BEs forming a BE-LEF complex, whereas the other LEF is not stalled, but fails to reach the BE-LEF complex thereby leaving an unextruded gap (**Supplementary Note 2 Fig. 2B**, left branch). Let  $[LEF]$  be the concentration of extruding LEFs not bound to BE. Configuration II type of scenarios occur with the following frequencies and result in the following lengths of unextruded DNA:

$$f_{\text{unextruded, Configuration II}} = 2 \frac{[BE-LEF]}{[LEF_o]} \frac{[LEF]}{[LEF_o]} P(M < \frac{d}{2}) \quad (12)$$

$$= 2 \frac{[BE-LEF]}{[LEF_o]} \frac{[LEF]}{[LEF_o]} (1 - \exp(-\frac{d}{l})) \quad (13)$$

$$l_{\text{unextruded, Configuration II}} = \frac{d}{2} - \int_0^{d/2} \frac{2}{l} m \cdot \exp(-\frac{2}{l} \cdot m) dm$$

$$= \frac{d}{2} - \frac{1}{2} (l - (d+l) \exp(-\frac{d}{l})). \quad (14)$$

Configuration III arises when both LEFs are each stalled by one of the BEs, leading to an unextruded DNA segment of average length that equals the TAD size  $D$  (**Supplementary Note 2 Fig. 2B**, right branch). Note that while in reality there could be more than one TAD is in between the loading sites of two adjacent LEFs, we do not consider those scenarios within our parameter space under mean-field theoretical model, since the largest separation  $d$  we consider is 500 kb, and the smallest total size of two adjacent TADs in our simulations is 600 kb (200 kb and 400 kb TAD next to each other), and thus on average there would not be more than one TAD between the loading sites of two adjacent LEFs. Configuration III type of scenarios occur with the following frequencies and result in the following lengths of unextruded DNA:

$$f_{\text{unextruded, Configuration III}} = \left( \frac{[BE-LEF]}{[LEF_o]} \right)^2 \quad (15)$$

$$l_{\text{unextruded, Configuration III}} = D. \quad (16)$$

Combining Eqs.(3)-(4),Eqs.(7)-(16), we obtain the expression for  $P_{\text{constrained}}$ :

$$P_{\text{constrained}} = \begin{cases} (1 - e^{-\frac{d}{l}}) / (1 + \frac{[BE-LEF]}{[LEF_o]} (1 - e^{-\frac{d}{l}}) (\frac{d}{l} - 1 + (\frac{d}{l} + 1) e^{-\frac{d}{l}})) & \text{if } \frac{d}{2} \leq D \\ (1 - e^{-\frac{d}{l}}) / (1 + (\frac{[BE-LEF]}{[LEF_o]} \frac{[LEF]}{[LEF_o]} (1 - e^{-\frac{d}{l}}) (\frac{d}{l} - 1 + (\frac{d}{l} + 1) e^{-\frac{d}{l}}) + (\frac{[BE-LEF]}{[LEF_o]})^2 \frac{D}{l})) & \text{if } \frac{d}{2} > D \end{cases} \quad (17)$$

The average DNA loop size  $l$  has been previously estimated using processivity  $\lambda$  and separation  $d$  with  $\sim 1\%$  precision for  $\frac{\lambda}{d} \in [10^{-1.5}, 10^{5.5}]$ , by applying the following expression obtained through fitting a 7-th degree polynomial to simulation results [15]:

$$l \approx 10^a \cdot d \quad (18)$$

where:

$$a = -0.08238 + 0.7258z - 0.2514z^2 - 0.003995z^3 + 0.03445z^4 - 0.01077z^5 + 0.001371z^6 - 6.472 \cdot 10^{-5}z^7 \quad (19)$$

$$z = \log_{10} \left( \frac{\lambda}{d} \right) \quad (20)$$

Now the only unknown in Eq.(17) is  $\frac{[BE-LEF]}{[LEF_o]}$ . To calculate  $\frac{[BE-LEF]}{[LEF_o]}$ , we consider the following system:

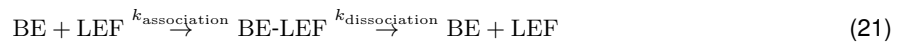

where BE-LEF is the complex of BE and LEF formed upon a LEF being stalled by a BE, with rate constant  $k_{\text{association}}$ . LEF in complex with BE dissociates from the DNA and reloads on the genome with rate constant  $k_{\text{dissociation}}$ . We assume one BE can only associate with one LEF at a time. Although we consider two-sided LEFs, the extrusion along both directions are identical and independent processes, thus we can consider the model in Eq.(21) only for extrusion in one direction, without loss of generality.

Since the rate of BE-LEF formation is determined by the rate of collision between BE and LEF, the association rate constant  $k_{\text{association}}$  can be written as the following:

$$k_{\text{association}} = v \cdot b \quad (22)$$

where  $v$  is the unobstructed extrusion speed in one direction (i.e., 1/2 the total extrusion speed), and  $b$  is boundary strength, defined as the probability of BE stalling LEF extrusion upon encountering (with probability  $1 - b$ , LEF extrudes past BE).

Once a LEF is stalled by a BE, the average duration before the LEF dissociates from the DNA is given by  $\frac{\lambda}{2v}$ , where  $\lambda$  is the processivity, i.e., the average length of DNA extruded by an unobstructed LEF. Thus the dissociation rate constant  $k_{\text{dissociation}}$  can be written as the following:

$$k_{\text{dissociation}} = \frac{2v}{\lambda} \quad (23)$$

We can write the following differential equation to describe the rate of formation of BE-LEF:

$$\frac{d[\text{BE-LEF}]}{dt} = k_{\text{association}} \cdot [\text{BE}] \cdot [\text{LEF}] - k_{\text{dissociation}} \cdot [\text{BE-LEF}] \quad (24)$$

At steady state, we have:

$$\frac{d[\text{BE-LEF}]}{dt} = 0 \quad (25)$$

Combining Eq.(22)-Eq.(25), we get:

$$\frac{[\text{BE-LEF}]}{[\text{LEF}_o]} = \begin{cases} \frac{d}{2\bar{D}} + \frac{1}{2} + \frac{d}{b\lambda} - \sqrt{\left(\frac{d}{2\bar{D}} + \frac{1}{2} + \frac{d}{b\lambda}\right)^2 - \frac{d}{\bar{D}}} & \text{if } b > 0 \\ 0 & \text{if } b = 0 \end{cases} \quad (26)$$

$$\frac{[\text{LEF}]}{[\text{LEF}_o]} = 1 - \frac{[\text{BE-LEF}]}{[\text{LEF}_o]} \quad (27)$$

Now we can substitute Eqs.(26)-(27) into Eq.(17) to solve for  $P_{\text{constrained}}$ . In the simulations we have four different TAD sizes of  $D_j \in \{200 \text{ kb}, 400 \text{ kb}, 800 \text{ kb}, 1200 \text{ kb}\}$ , each of which appears with a frequency of  $\omega_j \in \{0.5, 0.25, 0.125, 0.125\}$  respectively, and thus  $P_{\text{constrained}}$  can be computed by summing Eq.(17) with different TAD sizes weighted by the frequency of the TAD size (assuming  $b > 0$ ):

$$P_{\text{constrained}} = \sum_{j=1}^4 \begin{cases} \omega_j (1 - e^{-\frac{d}{\bar{D}_j}}) / \left(1 + \left(\frac{d}{2\bar{D}_j} + \frac{1}{2} + \frac{d}{b\lambda} - \sqrt{\left(\frac{d}{2\bar{D}_j} + \frac{1}{2} + \frac{d}{b\lambda}\right)^2 - \frac{d}{\bar{D}_j}}\right) (1 - e^{-\frac{d}{\bar{D}_j}})\right) & \text{if } \frac{d}{2} \leq \bar{D}_j \\ \left(\frac{d}{\bar{D}_j} - 1 + \left(\frac{d}{\bar{D}_j} + 1\right)e^{-\frac{d}{\bar{D}_j}}\right) & \\ \omega_j (1 - e^{-\frac{d}{\bar{D}_j}}) / \left(1 + \left(\frac{d}{2\bar{D}_j} + \frac{1}{2} + \frac{d}{b\lambda} - \sqrt{\left(\frac{d}{2\bar{D}_j} + \frac{1}{2} + \frac{d}{b\lambda}\right)^2 - \frac{d}{\bar{D}_j}}\right) (1 - e^{-\frac{d}{\bar{D}_j}})\right) & \\ \left(\frac{1}{2} - \frac{d}{2\bar{D}_j} - \frac{d}{b\lambda} + \sqrt{\left(\frac{d}{2\bar{D}_j} + \frac{1}{2} + \frac{d}{b\lambda}\right)^2 - \frac{d}{\bar{D}_j}}\right) (1 - e^{-\frac{d}{\bar{D}_j}}) & \\ \left(\frac{d}{\bar{D}_j} - 1 + \left(\frac{d}{\bar{D}_j} + 1\right)e^{-\frac{d}{\bar{D}_j}}\right) + \left(\frac{d}{2\bar{D}_j} + \frac{1}{2} + \frac{d}{b\lambda} - \sqrt{\left(\frac{d}{2\bar{D}_j} + \frac{1}{2} + \frac{d}{b\lambda}\right)^2 - \frac{d}{\bar{D}_j}}\right)^2 \frac{\bar{D}_j}{\bar{D}_j} & \text{if } \frac{d}{2} > \bar{D}_j \end{cases} \quad (28)$$

The theoretical expression we derived for  $P_{\text{constrained}}$  in Eq.(28) can predict the percentage of DSB sites constrained by LEFs with reasonably high accuracy (**Supplementary Note 2 Fig. 3**). For the rest of the paper, we use the weighted average TAD size of  $\bar{D} = \sum_{j=1}^4 D_j \cdot \omega_j = 450 \text{ kb}$  to simplify equations and calculations, unless specified otherwise.



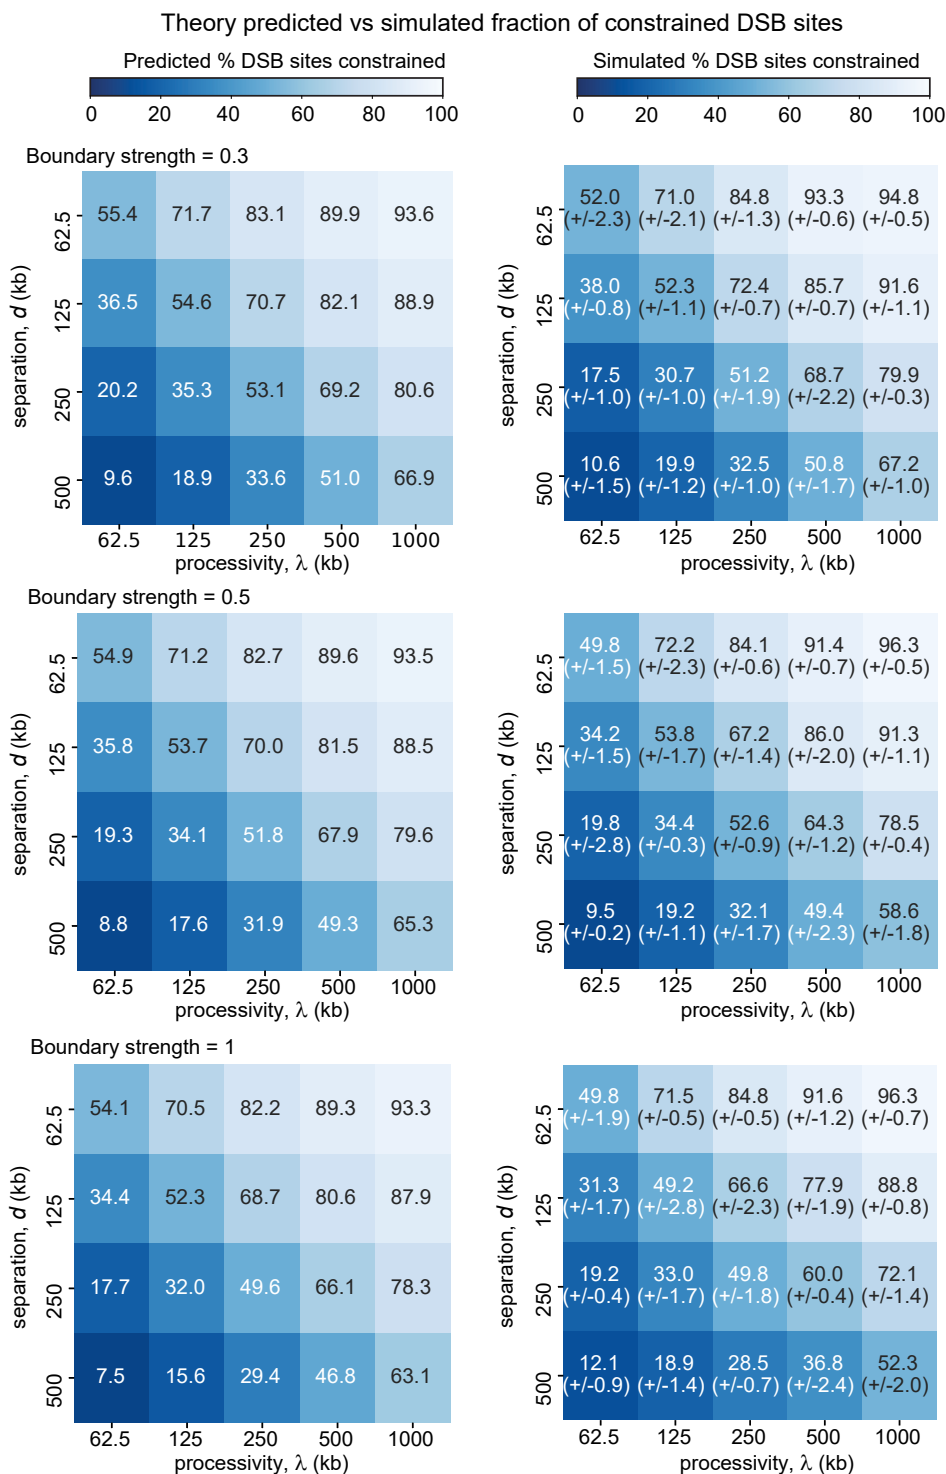

**Supplementary Note 2 Figure 3. Theory prediction of the fraction of DSB sites constrained by LEFs is consistent with simulation results across different boundary strengths.** The middle panel with boundary strength = 0.5 is the same as main text **Fig. 3B**.  $P_{\text{constrained}}$  can be predicted given processivity, separation, and boundary strength. Heatmaps of predicted (left) and simulated (right) fraction of constrained DSB sites with different combinations of processivity (y axis) and separation (x axis). Each row corresponds to boundary strengths of 0.3, 0.5 and 1 respectively. Numbers in brackets show standard error of mean,  $n=3$  independent simulations, with 218 DSB events per simulation.

## 2.2.1 Simplified expression for the probability of DSB ends being constrained

By using a linear approximation (tangent line approximation) of  $\frac{[\text{BE-LEF}]}{[\text{LEF}_o]}$ , we can simplify the expression for  $P_{\text{constrained}}$ . To this end, we define:

$$h(x) = \sqrt{x} \quad (29)$$

Then the linear approximation of  $h(x)$ ,  $H(x)$ , can be written as:

$$\begin{aligned} H(x) &= h(x_o) + h'(x_o)(x - x_o) \\ &= \sqrt{x_o} + \frac{1}{2\sqrt{x_o}}(x - x_o) \end{aligned} \quad (30)$$

Substituting  $x = \left(\frac{d}{2D} + \frac{1}{2} + \frac{d}{b\lambda}\right)^2 - \frac{d}{D}$  and  $a = \left(\frac{d}{2D} + \frac{1}{2} + \frac{d}{b\lambda}\right)^2$  into Eq.(30), we obtain the linear approximation of Eq.(26):

$$\frac{[\text{BE-LEF}]}{[\text{LEF}_o]} \approx \begin{cases} \frac{1}{1 + \frac{d}{2D} + \frac{2D}{b\lambda}} & \text{if } b > 0 \\ 0 & \text{if } b = 0 \end{cases} \quad (31)$$

Substituting Eq.(27) and Eq.(31) into Eq.(17), we get the simplified expression for  $P_{\text{constrained}}$ :

$$P_{\text{constrained}} \approx \begin{cases} (1 - e^{-\frac{l}{a}}) / \left(1 + \frac{(1 - e^{-\frac{d}{2D}})(\frac{d}{2D} - 1 + (\frac{d}{2D} + 1)e^{-\frac{d}{2D}})}{1 + \frac{d}{2D} + \frac{2D}{b\lambda}}\right) & \text{if } \frac{d}{2} \leq \bar{D} \\ (1 - e^{-\frac{l}{a}}) / \left(1 + \frac{(1 - e^{-\frac{d}{2D}})(\frac{D}{a} + \frac{2D}{b\lambda})(\frac{d}{2D} - 1 + (\frac{d}{2D} + 1)e^{-\frac{d}{2D}}) + \frac{D}{T}}{(1 + \frac{d}{2D} + \frac{2D}{b\lambda})^2}\right) & \text{if } \frac{d}{2} > \bar{D} \end{cases} \quad (32)$$

Eq.(32) shows  $P_{\text{constrained}}$  is a monotonic increasing function of  $l$  and  $\lambda$ , and a monotonic decreasing function of  $d$ .

## 2.3 The probability of end joining given that DSB ends are constrained

To calculate the probability of gap-bridging given that DSB ends are constrained,  $P_{\text{end-joining|constrained}}$ , we want to compute how often simultaneous gap-bridging on both sides of the DSB happens before the constraining LEF unloads. In other words, we want to determine how frequently the time it takes to achieve synapsis is shorter than the lifetime of the constraining LEF. Since gap-bridging on both sides of the DSB are independent of each other, it is more mathematically tractable to consider the probability of gap-bridging on each side, and then take into account that synapsis requires the gap-bridging on both sides of the DSB to happen at the same time. Therefore, we need to formulate the time to bridge the gap and the lifetime of constraining LEFs respectively, which we will discuss next.

### 2.3.1 The gap-bridging time distribution

We define the gap-bridging time,  $T$ , as the duration between DSB occurrence and the first time that the gap is bridged on one side of the DSB. Thus, let the first-passage time,  $T$ , be a random variable and the probability distribution of  $T$  be given by  $f_T$ . To simplify the theory, we initially assume there is no gap-bridging LEFs present between the constraining LEF and DSB ends at the time of DSB occurrence (we modify this assumption later on considering the full probability of gap-bridging), and we assume only one gap-bridging LEF carries out the bridging from beginning to end. Therefore, we can conceptualize gap-bridging on one side of the DSB for a given DSB site as a two-step process: first, a gap-bridging LEF must load between the DSB end and the constraining LEF; second, the gap-bridging LEF must extrude to bridge the gap between the DSB end and the constraining LEF. We define the loading time random variable as  $X$ , corresponding to the time it takes to finish the first step, and the extrusion time random variable as  $Y$ , corresponding to the time it takes to complete the second step. Thus,

$$T = X + Y \quad (33)$$

**2.3.1.1 The loading time distribution** Generally, we can assume that the process of loading gap-bridging LEFs into the gap between DSB end is Markovian, and thus exponential, with parameter,  $k_{\text{load}} = \langle \tau_{\text{load}} \rangle^{-1}$ , where  $k_{\text{load}}$  is the LEF loading rate, and  $\langle \tau_{\text{load}} \rangle$  is the average loading time. We assume LEFs reload randomly (uniform loading probability across the genome) as soon as they unload.

Let,  $L$ , be the length of the gap, i.e., the length of DNA between the DSB end and the edge of the constraining LEF. We assume the LEF lifetime is exponentially distributed with an average lifetime of  $\frac{\lambda}{2v}$ . The probability density function(PDF) of the loading time  $X$ , defined on the interval  $x \in [0, \infty)$ , can be described by the following exponential function:

$$X \sim f_X(x) = k_{\text{load}} \exp(-k_{\text{load}}x) = \frac{1}{\langle \tau_{\text{load}} \rangle} \exp\left(-\frac{x}{\langle \tau_{\text{load}} \rangle}\right) \quad (34)$$

in which:

$$k_{\text{load}} = \frac{2v}{\lambda} \cdot \frac{L}{d} \quad (35)$$

where, as a reminder,  $v$  is the extrusion speed in one direction (i.e., 1/2 the total extrusion rate),  $\lambda$  is the processivity (i.e., the average length of DNA extruded by an unobstructed LEF),  $L$  is the length of the DNA between the DSB end and the edge of the constraining LEF, and  $d$  is the average linear distance between LEF loading sites.

As can be told from Eq.(35), the longer the gap,  $L$ , between the DSB and the edge of the constraining LEF, the faster the loading of a gap-bridging LEF.

**2.3.1.2 The extrusion time distribution** Provided that a gap-bridging LEF has been loaded in the gap, we can then determine the distribution of extrusion times. Since we assume that only one gap-bridging LEF extrudes the gap, the extrusion time is determined by the time it takes to extrude to whichever of the DSB and constraining LEF is furthest away:  $\max(\frac{h}{v}, \frac{L-h}{v})$  where  $h \in [0, L]$  is the loading point of the LEF, as shown in the diagram below. Thus, the minimum extrusion time of  $\frac{L}{2v}$ , is achieved when the gap-bridging LEF loads right in the center of the gap, whereas the maximum extrusion time of  $\frac{L}{v}$  is achieved when the gap-bridging LEF loads at either boundary of the gap. Since we assume the loading of the LEFs is spatially homogeneous, the extrusion time  $Y \sim \text{Uniform}(\frac{L}{2v}, \frac{L}{v})$ .

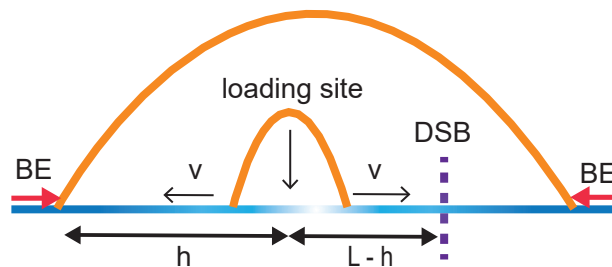

Thus, the PDF of the extrusion time  $Y$  is given by the following uniform distribution:

$$Y \sim f_Y(y) = \frac{1}{|\frac{L}{v} - \frac{L}{2v}|} = \frac{2v}{L} \quad (36)$$

defined on the interval  $[\frac{L}{2v}, \frac{L}{v}]$ .

We can rewrite Eq.(36) as the following to simplify expressions later on:

$$Y \sim f_Y(y) = \frac{2v}{L} \Theta \left( \frac{L}{2v} \leq y \leq \frac{L}{v} \right) \quad (37)$$

where,

$$\Theta = \begin{cases} 1 & \text{if the expression in the parentheses is True} \\ 0 & \text{otherwise} \end{cases} \quad (38)$$

**2.3.1.3 Computing the gap-bridging time distribution through convolution** Having determined the loading time distribution,  $f_X$ , and the extrusion time distribution,  $f_Y$ , we can now compute  $T = X + Y$ . To do so we need to compute the convolution of  $f_X$  and  $f_Y$ :

$$f_T(t) = \int_{-\infty}^{\infty} dx f_X(x) f_Y(t-x) \quad (39)$$

$$\begin{aligned} f_T(t) &= \int_{-\infty}^{\infty} dx f_X(x) f_Y(t-x) \\ &= \int_{-\infty}^{\infty} dx \left[ \frac{2v}{L} \Theta \left( \frac{L}{2v} \leq t-x \leq \frac{L}{v} \right) \right] [k_{\text{load}} \exp(-k_{\text{load}}x) \Theta(x > 0)] \\ &= \frac{2v}{L} \int_{-\infty}^{\infty} dx \left[ \Theta \left( t - \frac{L}{v} \leq x \leq t - \frac{L}{2v} \right) \right] [k_{\text{load}} \exp(-k_{\text{load}}x) \Theta(x > 0)] \\ &= \frac{2v}{L} \int_{\max(0, t - \frac{L}{v})}^{t - \frac{L}{2v}} dx k_{\text{load}} \exp(-k_{\text{load}}x) \end{aligned} \quad (40)$$

The solution has two parts, making it piece-wise continuous:

$$f_T(t) = \begin{cases} \frac{2v}{L} \int_0^{t-\frac{L}{2v}} dx k_{\text{load}} \exp(-k_{\text{load}}x) & \text{if } t < \frac{L}{v} \\ \frac{2v}{L} \int_{t-\frac{L}{v}}^{t-\frac{L}{2v}} dx k_{\text{load}} \exp(-k_{\text{load}}x) & \text{if } t \geq \frac{L}{v} \end{cases} \quad (41)$$

which results in:

$$f_T(t) = \begin{cases} \frac{2v}{L} (1 - \exp(-k_{\text{load}}(t - \frac{L}{2v}))) & \text{if } t < \frac{L}{v} \\ \frac{2v}{L} (\exp(-k_{\text{load}}(t - \frac{L}{v})) - \exp(-k_{\text{load}}(t - \frac{L}{2v}))) & \text{if } t \geq \frac{L}{v} \end{cases} \quad (42)$$

### 2.3.2 The constraining LEF lifetime distribution

Since gap-bridging must take place before the constraining LEF unloads, we need to also compute the distribution of the constraining LEF lifetime. Let the lifetime of constraining LEFs be given by the random variable  $C$ . The probability distribution of  $C$  is given by  $f_C$ . As above, we assume the lifetime of constraining LEFs are exponentially distributed, and  $\langle \tau_c \rangle$  is the average lifetime of constraining LEFs. The PDF of the constraining LEF lifetime  $C$  can be expressed as:

$$f_C(c) = \frac{1}{\langle \tau_c \rangle} \exp\left(-\frac{c}{\langle \tau_c \rangle}\right) \quad (43)$$

in which:

$$\langle \tau_c \rangle = \frac{\lambda}{2v} \quad (44)$$

### 2.3.3 The probability of gap-bridging on one side of the DSB

Having determined the gap-bridging time distribution  $f_T$ , and the constraining LEF lifetime distribution  $f_C$ , we can now compute the probability of gap-bridging on the side of the DSB that is bridged first. The calculation of  $f_T$  above assumes there is no gap-bridging LEF present at the time of DSB occurrence. However, there is a nonnegligible probability that gap-bridging LEFs are already present in the gap. The average number of gap-bridging LEFs within the constraining LEF,  $n$ , can be approximated as the following using Eq.(18) [15]:

$$n = \frac{l}{d} \approx 10^a \quad (45)$$

where  $a$  is defined in Eq.(19)-(20).

Let the number of gap-bridging LEFs inside the constraining LEF,  $N$ , be a random variable. Then  $N$  follows Poisson distribution:

$$N \sim \text{Pois}(n) \quad (46)$$

Thus the probability of having no gap-bridging LEFs inside the constraining LEF is:

$$\begin{aligned} P(N = 0) &= \frac{n^0 e^{-n}}{0!} \\ &= e^{-n} \\ &= e^{-\frac{l}{d}} \end{aligned} \quad (47)$$

Conversely, the probability of having one or more gap-bridging LEFs is:

$$P(N \geq 1) = 1 - P(N = 0) \quad (48)$$

$$= 1 - e^{-\frac{l}{d}} \quad (49)$$

As an approximation, we assume if one or more gap-bridging LEFs are present within the constraining LEF at the time of DSB occurrence, then one gap will be successfully bridged with probability 1. This approximation is motivated by the observation that the loading of gap-bridging LEF is the rate-limiting step of synapsis (**Supplementary Fig. 3**). If one or more gap-bridging LEFs are present within the constraining LEF, one of the two gaps are likely closed by the pre-existing gap-bridging LEFs. However, if initially there is no gap-bridging LEF inside the constraining LEF, the gap-bridging time  $T$  must be smaller than the constraining LEF lifetime  $C$ . We note  $f_T$  is a function of the gap length  $L$ , and we denote the gap length on the side bridged first as  $L_{1st}$ . Therefore,

$$P_{1st\text{gap-bridged}} = P(N \geq 1) \cdot 1 + P(N = 0) \cdot \int_0^\infty dt f_T(T = t, L = L_{1st}) P(C > t) \quad (50)$$

$$= 1 - e^{-\frac{l}{d}} + e^{-\frac{l}{d}} \int_0^\infty dt f_T(T = t, L = L_{1st}) (1 - F_C(t)) \quad (51)$$

where  $F_C$  is the cumulative distribution function of the constraining LEF lifetime:

$$F_C(t) = \int_{-\infty}^t dt' f_C(t'). \quad (52)$$

Because  $f_T$  is piece-wise continuous, we can compute this by breaking it up into two parts:

$$\begin{aligned} P_{1^{\text{st}}\text{gap-bridged}} &= 1 - e^{-\frac{L}{d}} + e^{-\frac{L}{d}} \int_0^{\infty} dt f_T(t, L_{1st}) \left[ \int_t^{\infty} dt' f_C(t') \right] \\ &= 1 - e^{-\frac{L}{d}} + e^{-\frac{L}{d}} \cdot \\ &\quad \left\{ \int_0^{\frac{L_{1st}}{v}} dt f_T(t, L_{1st}) \left[ \int_t^{\frac{L_{1st}}{v}} dt' f_C(t') \right] + \int_{\frac{L_{1st}}{v}}^{\infty} dt f_T(t, L_{1st}) \left[ \int_t^{\infty} dt' f_C(t') \right] \right\} \\ &= 1 - e^{-\frac{L}{d}} + e^{-\frac{L}{d}} \frac{2v}{L_{1st}} \cdot \left[ \frac{\lambda}{2v} (e^{-\frac{L_{1st}}{\lambda}} - e^{-\frac{2L_{1st}}{\lambda}}) + \frac{e^{-\frac{2L_{1st}}{\lambda}} - e^{-\frac{L_{1st}}{\lambda}}}{k_{\text{load}} + \frac{2v}{\lambda}} \right] \end{aligned} \quad (53)$$

### 2.3.4 Simultaneous gap-bridging on both sides of the DSB and the gap-bridging LEF lifetime distribution

In order to achieve synapsis, the gaps on both sides of the DSB must be bridged simultaneously. In other words, once the gap on one side of the DSB is bridged, the gap on the other side of the DSB must be bridged before the gap-bridging LEF on the side bridged first unloads. Let the lifetime of gap-bridging LEFs that have already finished gap-bridging on the side of DSB bridged first be given by the random variable  $G$ , whose PDF is  $f_G$ . Then the probability of gap bridging on the second side (while the gap-bridging LEF on the first side remains bound) can be written as:

$$P_{2^{\text{nd}}\text{gap-bridged}} = P(T \leq G \leq C) \quad (54)$$

$$= \int_0^{\infty} f_T(T = t, L = L_{2nd}) P(C > t) P(G > t) dt \quad (55)$$

$$= \int_0^{\infty} dt f_T(T = t, L = L_{2nd}) (1 - F_C(t)) (1 - F_G(t)) \quad (56)$$

where:

$$F_G(t) = \int_{-\infty}^t dt' f_G(t') \quad (57)$$

Utilizing the memoryless property of exponential distribution, the PDF of the lifetime  $G$  of the gap-bridging LEF that have already finished gap-bridging on the side bridged first, can be expressed as:

$$f_G(g) = \frac{1}{\langle \tau_g \rangle} \exp\left(-\frac{g}{\langle \tau_g \rangle}\right) \quad (58)$$

in which:

$$\langle \tau_g \rangle = \frac{\lambda}{2v} \quad (59)$$

Note the PDF of gap-bridging LEF lifetimes is mathematically identical to the PDF of constraining LEF lifetimes, since these two kinds of LEFs are essentially identical, and their identity are assigned based on their locations relative to a DSB. We assign different notations here to facilitate our discussions of extensions to the loop extrusion model later where distinguishing them becomes helpful. Now we can compute the probability of bridging the gap on the other side of the DSB while the gap-bridging LEF on the side bridged first remains:

$$\begin{aligned} P_{2^{\text{nd}}\text{gap-bridged}} &= \int_0^{\infty} dt f_T(t, L_{2nd}) \left[ \int_t^{\infty} dt' f_C(t') \right] \left[ \int_t^{\infty} dt' f_G(t') \right] \\ &= \frac{2v}{L_{2nd}} \cdot \left[ \frac{\lambda}{4v} (e^{-\frac{2L_{2nd}}{\lambda}} - e^{-\frac{4L_{2nd}}{\lambda}}) + \frac{e^{-\frac{4L_{2nd}}{\lambda}} - e^{-\frac{2L_{2nd}}{\lambda}}}{k_{\text{load}} + \frac{4v}{\lambda}} \right] \end{aligned} \quad (60)$$

### 2.3.5 Computing the probability of joining DSB ends given DSB ends are constrained

Since gap-bridging on the first side and the second side of the DSB are independent processes, the probability of both gaps being bridged upon the first try is the product of Eq.(53) and Eq.(60). However, gap-bridging does not need to be achieved upon the first try: as long as the constraining LEF remains, even if the gap-bridging LEF on the side bridged first unloads, the gap-bridging process can continue until simultaneous gap-bridging on both sides of the DSB is fulfilled. Thus the probability of joining DSB ends given DSB ends are constrained for a given DSB site whose gap lengths are  $L_{1st}$  and  $L_{2nd}$  can be written as the following infinite sum:

$$\begin{aligned}
 P_{\text{end-joining|constrained}} = & [1 - e^{-\frac{l}{d}} + e^{-\frac{l}{d}} \cdot \int_0^\infty dt f_T(t, L_{1st})(1 - F_C(t))] \cdot \\
 & [\int_0^\infty dt f_T(t, L_{2nd})(1 - F_C(t))(1 - F_G(t)) + \\
 & \int_0^\infty dt f_T(t, L_{2nd})(1 - F_C(t))F_G(t) \cdot \\
 & \int_0^\infty dt f_T(t, L_{1st})(1 - F_C(t))(1 - F_G(t)) + \\
 & \int_0^\infty dt f_T(t, L_{2nd})(1 - F_C(t))F_G(t) \cdot \\
 & \int_0^\infty dt f_T(t, L_{1st})(1 - F_C(t))F_G(t) \cdot \\
 & \int_0^\infty dt f_T(t, L_{2nd})(1 - F_C(t))(1 - F_G(t)) + \dots] \quad (61)
 \end{aligned}$$

Utilizing the formula for the infinite sum of a geometric series, the equation above can be reduced to:

$$\begin{aligned}
 P_{\text{end-joining|constrained}} = & [1 - e^{-\frac{l}{d}} + e^{-\frac{l}{d}} \cdot \int_0^\infty dt f_T(t, L_{1st})(1 - F_C(t))] \cdot \\
 & \{ \int_0^\infty dt f_T(t, L_{2nd})(1 - F_C(t))(1 - F_G(t)) / \\
 & [1 - \int_0^\infty dt f_T(t, L_{2nd})(1 - F_C(t))F_G(t) \cdot \\
 & \int_0^\infty dt f_T(t, L_{2nd})(1 - F_C(t))F_G(t)] + \\
 & \int_0^\infty dt f_T(t, L_{2nd})(1 - F_C(t))(1 - F_G(t)) \cdot \\
 & \int_0^\infty dt f_T(t, L_{2nd})(1 - F_C(t))F_G(t) / \\
 & [1 - \int_0^\infty dt f_T(t, L_{2nd})(1 - F_C(t))F_G(t) \cdot \\
 & \int_0^\infty dt f_T(t, L_{2nd})(1 - F_C(t))F_G(t)] \} \quad (62)
 \end{aligned}$$

Eq.(62) is written for a specific DSB site with gap lengths of  $L_{1st}$  and  $L_{2nd}$  for the side bridged first and the side bridged second respectively. We assume the total length of the gaps on both sides of the DSB (the sum of  $L_{1st}$  and  $L_{2nd}$ ), is the average DNA loop size  $l$ :

$$L_{1st} + L_{2nd} = l \quad (63)$$

We can then integrate over  $L_{1st} \in (0, l)$  to generalize Eq.(62) for any DSB site, given that the location of DSB is random:

$$\begin{aligned}
 P_{\text{end-joining|constrained}} = & \frac{1}{l} \int_0^l dL_{1st} \{1 - e^{-\frac{l}{d}} + e^{-\frac{l}{d}} \int_0^\infty dt f_T(T = t, L = L_{1st})(1 - F_C(t))\} \cdot \\
 & \{ \int_0^\infty dt f_T(T = t, L = l - L_{1st})(1 - F_C(t))(1 - F_G(t)) / \\
 & [1 - \int_0^\infty dt f_T(T = t, L = l - L_{1st})(1 - F_C(t))F_G(t) \cdot \\
 & \int_0^\infty dt f_T(T = t, L = L_{1st})(1 - F_C(t))F_G(t)] + \\
 & \int_0^\infty dt f_T(T = t, L = L_{1st})(1 - F_C(t))(1 - F_G(t)) \cdot \\
 & \int_0^\infty dt f_T(T = t, L = l - L_{1st})(1 - F_C(t))F_G(t) / \\
 & [1 - \int_0^\infty dt f_T(T = t, L = l - L_{1st})(1 - F_C(t))F_G(t) \cdot \\
 & \int_0^\infty dt f_T(T = t, L = L_{1st})(1 - F_C(t))F_G(t)] \} \} \quad (64)
 \end{aligned}$$

We define:

$$A(L) = \int_0^\infty f_T(T = t, L)(1 - F_C(t))dt \quad (65)$$

$$B_1(L) = \int_0^\infty f_T(T = t, L)(1 - F_C(t))(1 - F_G(t))dt \quad (66)$$

$$B_2(L) = \int_0^\infty f_T(T = t, L)(1 - F_C(t))F_G(t)dt \quad (67)$$

Thus Eq.(64) can be rewritten as:

$$\begin{aligned}
 P_{\text{end-joining|constrained}} = & \frac{1}{l} \int_0^l [1 - e^{-\frac{l}{d}} + e^{-\frac{l}{d}} A(L_{1st})] \cdot \{B_1(l - L_{1st})/[1 - B_2(l - L_{1st}) \cdot B_2(L_{1st})] + \\
 & B_1(L_{1st}) \cdot B_2(l - L_{1st})/[1 - B_2(l - L_{1st}) \cdot B_2(L_{1st})]\} dL_{1st} \quad (68)
 \end{aligned}$$

We have computed Eq.(65) and Eq.(66) for specific gap lengths of  $L_{1st}$  and  $L_{2nd}$  respectively in Eq.(53) and Eq.(60). We rewrite them below for the general gap length of  $L$ :

$$A(L) = \frac{2v}{L} (e^{-\frac{L}{\lambda}} - e^{-\frac{2L}{\lambda}}) \left( \frac{\lambda}{2v} - \frac{1}{k_{\text{load}} + \frac{2v}{\lambda}} \right) \quad (69)$$

$$B_1(L) = \frac{2v}{L} (e^{-\frac{2L}{\lambda}} - e^{-\frac{4L}{\lambda}}) \left( \frac{\lambda}{4v} - \frac{1}{k_{\text{load}} + \frac{4v}{\lambda}} \right) \quad (70)$$

Notice Eq.(67) is simply the difference between  $A(L)$  and  $B_1(L)$ :

$$B_2(L) = A(L) - B_1(L) \quad (71)$$

Now we can substitute Eqs.(18)-(20) and Eqs.(69)-(71) into Eq.(68) and perform numerical integration to obtain  $P_{\text{end-joining|constrained}}$ .

The probability of synapsis  $P_{\text{synapsis}}$  can then be determined by multiplying the numerically integrated  $P_{\text{end-joining|constrained}}$  and the  $P_{\text{constrained}}$  computed in Eq.(28). Note that  $P_{\text{end-joining|constrained}}$  and  $P_{\text{constrained}}$  both only depend on the LEF processivity  $\lambda$  and the LEF separation  $d$ , and thus  $P_{\text{synapsis}}$  can also be determined as long as we know  $\lambda$  and  $d$ . Below we compare the synapsis efficiency predicted by our analytical expression for  $P_{\text{synapsis}}$  and the simulated synapsis efficiency with different combinations of  $\lambda$  and  $d$ . This comparison shows that our theory is reasonably accurate (**Supplementary Note 2 Fig. 4**).

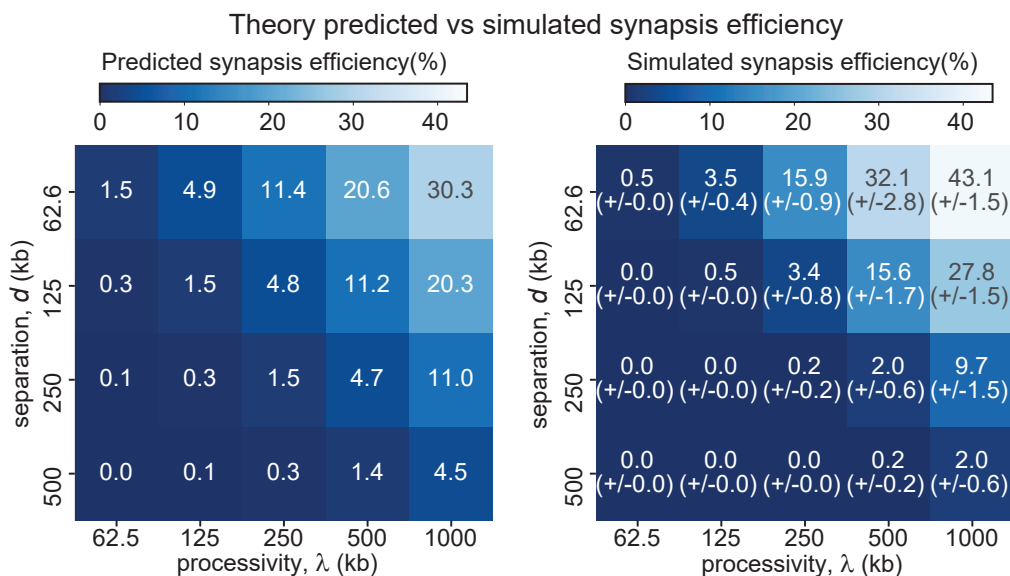

**Supplementary Note 2 Figure 4. Theory prediction of synopsis efficiency is consistent with simulation results.** Same as **Supplementary Fig. 3**. Heatmaps of predicted (left) and simulated (right; numbers in brackets show standard error of mean,  $n=3$  independent simulations, with 218 DSB events per simulation) synopsis efficiency with different combinations of processivity ( $y$  axis) and separation ( $x$  axis). Boundary strength = 0.5 was used in the simulations.

### 2.3.6 Simplified expression for the probability of end-joining given the DSB is constrained and two important relative timescales

Our theory above highlights that  $P_{\text{synopsis}}$  can be determined from just  $\lambda$  and  $d$ . However, despite this seemingly simple picture and the reasonable agreement between our theory and simulations, our theoretical formulation for  $P_{\text{synopsis}}$  is still too complicated to be written in a compact form. Therefore, it is challenging for someone to gain mechanistic intuition for what factors underlie efficient synopsis. In this section, we aim to simplify the expression for  $P_{\text{synopsis}}$  with the goal of gaining mechanistic intuition.

Let us consider the scenario where gaps are bridged upon the first try. Further, let us consider a DSB site with the break right in the center of the constraining LEF, and thus with gap length  $L = \frac{l}{2}$  on both sides of the DSB. We assume there is no gap-bridging LEF present in the constraining LEF at the time of DSB occurrence. Then  $P_{\text{end-joining|constrained}}$  can be approximated as the following expression simplified from the product of Eq.(53) and Eq.(60):

$$\begin{aligned}
 P_{\text{end-joining|constrained}} &\approx A\left(\frac{l}{2}\right) \cdot B_1\left(\frac{l}{2}\right) \\
 &= \frac{v}{l} \left( e^{-\frac{l}{2\lambda}} - e^{-\frac{l}{\lambda}} \right) \left( \frac{\lambda}{2v} - \frac{1}{k_{\text{load}} + \frac{2v}{\lambda}} \right) \\
 &= \frac{v}{l} \left( e^{-\frac{l}{\lambda}} - e^{-\frac{2l}{\lambda}} \right) \left( \frac{\lambda}{4v} - \frac{1}{k_{\text{load}} + \frac{4v}{\lambda}} \right) \quad (72)
 \end{aligned}$$

We can rewrite Eq.(72) as:

$$\begin{aligned}
 P_{\text{end-joining|constrained}} &\approx \left[ \frac{\tau_{\text{constrained}}^2}{\tau_{\text{extrusion}}(\tau_{\text{loading}} + \tau_{\text{constrained}})} \left( e^{-\frac{\tau_{\text{extrusion}}}{\tau_{\text{constrained}}}} - e^{-\frac{2\tau_{\text{extrusion}}}{\tau_{\text{constrained}}}} \right) \right] \cdot \\
 &\quad \left[ \frac{\tau_{\text{constrained}}^2}{2\tau_{\text{extrusion}}(2\tau_{\text{loading}} + \tau_{\text{constrained}})} \left( e^{-\frac{2\tau_{\text{extrusion}}}{\tau_{\text{constrained}}}} - e^{-\frac{4\tau_{\text{extrusion}}}{\tau_{\text{constrained}}}} \right) \right] \quad (73)
 \end{aligned}$$

where:

$$\tau_{\text{constrained}} = \frac{\lambda}{2v} \quad (74)$$

$$\tau_{\text{extrusion}} = \frac{l}{4v} \quad (75)$$

$$\begin{aligned}
 \tau_{\text{loading}} &= \frac{1}{k_{\text{load}}} \\
 &= \frac{\lambda d}{lv} \quad (76)
 \end{aligned}$$



We can further simplify Eq.(73) by defining:

$$f(a) = \frac{1}{a}(e^{-a} - e^{-2a}) \quad (77)$$

Then Eq.(73) can be written as:

$$P_{\text{end-joining|constrained}} \approx \frac{f\left(\frac{\tau_{\text{extrusion}}}{\tau_{\text{constrained}}}\right)}{1 + \frac{\tau_{\text{loading}}}{\tau_{\text{constrained}}}} \cdot \frac{f\left(\frac{2\tau_{\text{extrusion}}}{\tau_{\text{constrained}}}\right)}{1 + \frac{2\tau_{\text{loading}}}{\tau_{\text{constrained}}}} \quad (78)$$

The simplified formula for  $P_{\text{gap-bridged|constrained}}$  suggests that given the DSB ends are constrained, synapsis efficiency is dictated by two relative timescales: the ratio of loading time and the constraining LEF lifetime and the ratio of extrusion time and the constraining LEF lifetime. Further,  $P_{\text{gap-bridged|constrained}}$  monotonically decreases with the two relative timescales, so decreasing either or both of the two relative timescales will improve synapsis efficiency.

Substituting Eq.(32) and Eq.(78) into Eq.(2), we can obtain a final simplified expression for the synapsis efficiency:

$$P_{\text{synapsis}} \approx \begin{cases} (1 - e^{-\frac{d}{2}}) / \left(1 + \frac{(1 - e^{-\frac{d}{2}})(\frac{d}{2} - 1 + (\frac{d}{2} + 1)e^{-\frac{d}{2}})}{1 + \frac{D}{d} + \frac{2D}{b\lambda}}\right) \cdot \frac{f\left(\frac{\tau_{\text{extrusion}}}{\tau_{\text{constrained}}}\right)}{1 + \frac{\tau_{\text{loading}}}{\tau_{\text{constrained}}}} \cdot \frac{f\left(\frac{2\tau_{\text{extrusion}}}{\tau_{\text{constrained}}}\right)}{1 + \frac{2\tau_{\text{loading}}}{\tau_{\text{constrained}}}} & \text{if } \frac{d}{2} \leq \bar{D} \\ (1 - e^{-\frac{d}{2}}) / \left(1 + \frac{(1 - e^{-\frac{d}{2}})(\frac{D}{d} + \frac{2D}{b\lambda})(\frac{d}{2} - 1 + (\frac{d}{2} + 1)e^{-\frac{d}{2}}) + \frac{D}{2}}{(1 + \frac{D}{d} + \frac{2D}{b\lambda})^2}\right) \cdot \frac{f\left(\frac{\tau_{\text{extrusion}}}{\tau_{\text{constrained}}}\right)}{1 + \frac{\tau_{\text{loading}}}{\tau_{\text{constrained}}}} \cdot \frac{f\left(\frac{2\tau_{\text{extrusion}}}{\tau_{\text{constrained}}}\right)}{1 + \frac{2\tau_{\text{loading}}}{\tau_{\text{constrained}}}} & \text{if } \frac{d}{2} > \bar{D} \end{cases} \quad (79)$$

## 2.4 Synapsis with additional mechanisms

In this section, we will discuss four experimentally plausible extensions of the simple loop extrusion model that improve synapsis efficiency: stabilization of LEFs by BEs, the presence of a small fraction of long-lived LEFs, stabilization of LEFs by DSB ends, and targeted loading of LEFs to DSBs. We start by investigating how the addition of each of the four mechanisms modifies the expressions derived above. Finally, we end by showing the combined effect of all four mechanisms on synapsis efficiency.

### 2.4.1 Synapsis with stabilized LEFs by BEs

One mechanism that improves synapsis efficiency by increasing  $P_{\text{constrained}}$  is the stabilization of LEFs by BEs. We define,  $w$ , as the fold increase in LEF lifetime through stabilization by BEs. We assume LEFs with one or both motors bound to a BE have identical fold increase in lifetime,  $w$ . Intuitively,  $P_{\text{constrained}}$  increases with BE stabilization of LEFs since the LEFs stabilized by BEs extrude larger loops; therefore, DSBs are more likely to happen inside loops. To incorporate the effect of BE stabilization on  $P_{\text{constrained}}$ , we modify the rate of BE-LEF dissociation in Eq.(23) to the following:

$$k_{\text{dissociation, BEstabilized}} = \frac{2v}{w\lambda} \quad (80)$$

The updated BE-LEF dissociation rate in Eq.(80) in turn updates the fraction of LEF motor subunits extruding in one direction that are bound to BEs in Eqs.(26)-(27) to the following:

$$\frac{[\text{BE-LEF}]}{[\text{LEF}_o]_{\text{BEstabilized}}} = \begin{cases} \frac{d}{2D} + \frac{1}{2} + \frac{d}{bw\lambda} - \sqrt{\left(\frac{d}{2D} + \frac{1}{2} + \frac{d}{bw\lambda}\right)^2 - \frac{d}{D}} & \text{if } b > 0 \\ 0 & \text{if } b = 0 \end{cases} \quad (81)$$

$$\frac{[\text{LEF}]}{[\text{LEF}_o]_{\text{BEstabilized}}} = 1 - \frac{[\text{BE-LEF}]}{[\text{LEF}_o]_{\text{BEstabilized}}} \quad (82)$$

To account for the effect of BE stabilization of LEFs on parameters such as the average LEF processivity and average LEF loop size, we first need to know what fraction of LEFs are stalled at BEs. Let,  $\beta$ , be the fraction of LEFs that have at least one motor subunit bound to BEs, then  $\beta$  can be calculated as:

$$\beta = 1 - \left(1 - \frac{[\text{BE-LEF}]}{[\text{LEF}_o]_{\text{BEstabilized}}}\right)^2 \quad (83)$$

Eq.(83) can reasonably well predict the fraction of LEFs stabilized by BEs (**Supplementary Note 2 Fig. 5**).

Theory predicted vs simulated fraction of LEFs stabilized by BE

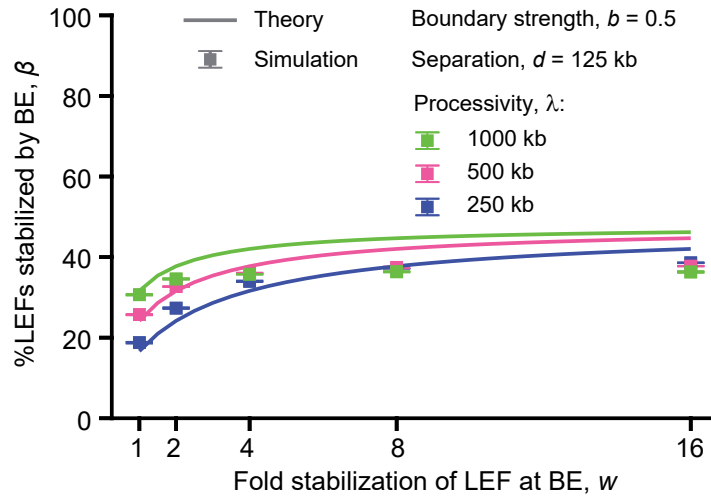

**Supplementary Note 2 Figure 5. The percentage of LEFs stabilized by BEs predicted by our theory is largely consistent with the simulation results.** The error bars represent the standard error of mean,  $n = 3$  independent simulations, with 218 DSB events per simulation.

We can then use Eq.(83) to compute the weighted average processivity and the calculate the average loop size:

$$\lambda_{\text{BEstabilized}} = \beta \cdot w\lambda + (1 - \beta) \cdot \lambda \quad (84)$$

$$z_{\text{BEstabilized}} = \log_{10}\left(\frac{\lambda_{\text{BEstabilized}}}{d}\right) \quad (85)$$

$$\begin{aligned} a_{\text{BEstabilized}} = & -0.08238 + 0.7258z_{\text{BEstabilized}} - 0.2514z_{\text{BEstabilized}}^2 \\ & - 0.003995z_{\text{BEstabilized}}^3 + 0.03445z_{\text{BEstabilized}}^4 - 0.01077z_{\text{BEstabilized}}^5 \\ & + 0.001371z_{\text{BEstabilized}}^6 - 6.472 \cdot 10^{-5}z_{\text{BEstabilized}}^7 \end{aligned} \quad (86)$$

$$l_{\text{BEstabilized}} = 10^{a_{\text{BEstabilized}}} \cdot d \quad (87)$$

Eqs.(81)-(82) and Eq.(87) in turn update the probability of DSB happening in loops defined in Eq.(17) to the following:

$$P_{\text{constrained, BEstabilized}} =$$

$$\begin{cases} \left( \frac{(1 - e^{-\frac{l_{\text{BEstabilized}}}{d}})}{(\frac{d}{l_{\text{BEstabilized}}} - 1 + (\frac{d}{l_{\text{BEstabilized}}} + 1)e^{-\frac{d}{l_{\text{BEstabilized}}}})} \right) \cdot \left( 1 + \frac{[\text{BE-LEF}]_{\text{BEstabilized}}}{[\text{LEF}_o]_{\text{BEstabilized}}} (1 - e^{-\frac{d}{l_{\text{BEstabilized}}}}) \right) & \text{if } \frac{d}{2} \leq \bar{D} \\ \left( \frac{(1 - e^{-\frac{l_{\text{BEstabilized}}}{d}})}{(\frac{d}{l_{\text{BEstabilized}}} - 1 + (\frac{d}{l_{\text{BEstabilized}}} + 1)e^{-\frac{d}{l_{\text{BEstabilized}}}})} \right) \cdot \left( 1 + \frac{[\text{BE-LEF}]_{\text{BEstabilized}}}{[\text{LEF}_o]_{\text{BEstabilized}}} \frac{[\text{LEF}]_{\text{BEstabilized}}}{[\text{LEF}_o]_{\text{BEstabilized}}} (1 - e^{-\frac{d}{l_{\text{BEstabilized}}}}) \right) & \text{if } \frac{d}{2} > \bar{D} \end{cases} \quad (88)$$

We next aim to compute  $P_{\text{end-joining|constrained, BEstabilized}}$ . The first consideration is to account for the effect of BE stabilization on the distribution of constraining LEF lifetimes,  $f_C$ . We thus sought to calculate the probability that a DSB is flanked by constraining LEFs. As a first-pass, we calculate the probability that a DSB occurs in a TAD held together by at least one constraining LEF. Since a TAD is defined by a pair of convergent BEs, the probability,  $P_{\text{stabilized}}$ , of a TAD having at least one BE occupied, is:

$$P_{\text{stabilized}} = 1 - \left( 1 - \frac{[\text{BE-LEF}]_{\text{BEstabilized}}}{[\text{BE}_o]_{\text{BEstabilized}}} \right)^2 \quad (89)$$

Eq.(89) can accurately predict the fraction of TADs with stabilized LEFs (**Supplementary Note 2 Fig. 6**). As shown in **Supplementary Note 2 Fig. 6**, most of TADs have at least one LEF stabilized by BE in the parameter space considered. Since the LEFs stabilized by BE will likely constrain DSB ends in a DSB-containing TAD due to their prolonged lifetime, we make the simplifying assumption that with LEF stabilization by BE, all constraining LEFs obtain a  $w$  fold increase in lifetime.

Thus, the modified constraining LEF lifetime distribution is:

Theory predicted vs simulated fraction of TADs with stabilized LEFs

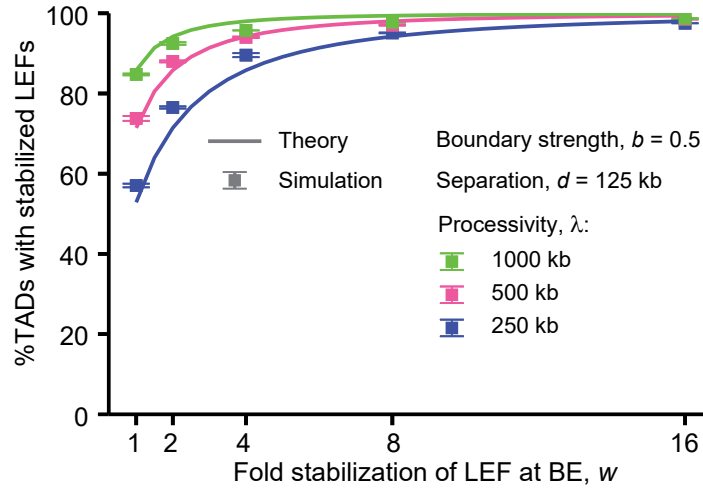

**Supplementary Note 2 Figure 6. Most TADs have at least one LEF stabilized by BE.** The error bars represent the standard error of mean,  $n = 3$  independent simulations, with 218 DSB events per simulation.

$$f_{C, \text{BEstablished}}(c) = \frac{1}{\langle \tau_{c, \text{BEstablished}} \rangle} \exp\left(-\frac{c}{\langle \tau_{c, \text{BEstablished}} \rangle}\right) \quad (90)$$

where:

$$\langle \tau_{c, \text{BEstablished}} \rangle = \frac{w\lambda}{2v} \quad (91)$$

As a further simplifying approximation, we neglect the effect of BE stabilization on loading time distribution, since only the fraction of LEFs stabilized by BEs have slower dynamics.

The modified  $f_C$  updates Eqs.(68)-(71) to the following:

$$P_{\text{end-joining|constrained, BEstablished}} = \frac{1}{l} \int_0^l \left[ 1 - e^{-\frac{l}{d}} + e^{-\frac{l}{d}} A_{\text{BEstablished}}(L_{1st}) \right] \cdot \left\{ B_{1, \text{BEstablished}}(l - L_{1st}) / \left[ 1 - B_{2, \text{BEstablished}}(l - L_{1st}) \cdot B_{2, \text{BEstablished}}(L_{1st}) \right] + B_{1, \text{BEstablished}}(L_{1st}) \cdot B_{2, \text{BEstablished}}(l - L_{1st}) / \left[ 1 - B_{2, \text{BEstablished}}(l - L_{1st}) \cdot B_{2, \text{BEstablished}}(L_{1st}) \right] \right\} dL_{1st} \quad (92)$$

$$A_{\text{BEstablished}}(L) = \frac{2v}{L} \left( e^{-\frac{L}{w\lambda}} - e^{-\frac{2L}{w\lambda}} \right) \left( \frac{w\lambda}{2v} - \frac{1}{k_{\text{load}} + \frac{2v}{w\lambda}} \right) \quad (93)$$

$$B_{1, \text{BEstablished}}(L) = \frac{2v}{L} \left( e^{-\frac{L}{\lambda} \cdot \frac{1+w}{w}} - e^{-\frac{2L}{\lambda} \cdot \frac{1+w}{w}} \right) \left( \frac{w\lambda}{2v(1+w)} - \frac{1}{k_{\text{load}} + \frac{2v}{\lambda} \cdot \frac{1+w}{w}} \right) \quad (94)$$

$$B_{2, \text{BEstablished}}(L) = A_{\text{BEstablished}}(L) - B_{1, \text{BEstablished}}(L) \quad (95)$$

$P_{\text{synapsis, BEstablished}}$  can then be computed as:

$$P_{\text{synapsis, BEstablished}} = P_{\text{end-joining|constrained, BEstablished}} \cdot P_{\text{constrained, BEstablished}} \quad (96)$$

Eq.(96) can accurately predict the synapsis efficiency with BE stabilization, validating our mechanistic explanation of BE stabilization facilitating synapsis by improving the chance of DSB happening inside a loop and increasing the lifetime of constraining LEFs (**Supplementary Note 2 Fig. 7**).

### Theory predicted and simulated synopsis efficiency with stabilization of LEFs by BE

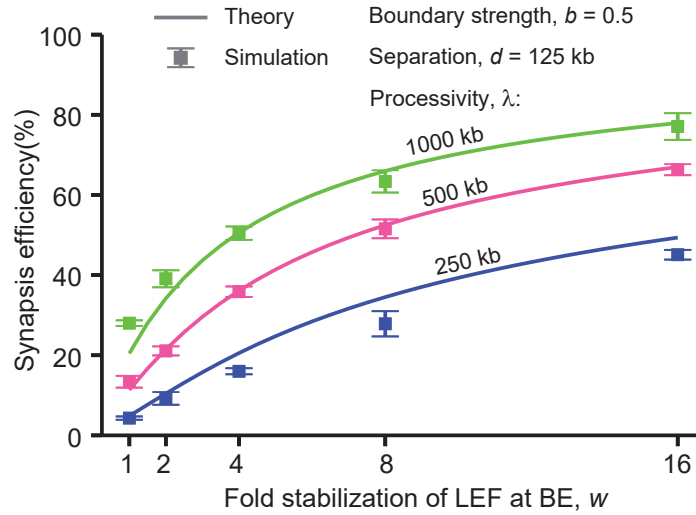

**Supplementary Note 2 Figure 7. Theory predicts the synopsis efficiency with BE stabilization.** Same as the bottom panel in main text **Fig. 4A**. The error bars represent the standard error of mean,  $n = 3$  independent simulations, with 218 DSB events per simulation.

#### 2.4.2 Synopsis with a small fraction of long-lived LEFs

Another mechanism that increases both the chance of DSB happening in loops and  $\tau_{\text{constrained}}$  is the presence of a small fraction of long-lived LEFs. Let,  $\alpha_o$ , be the fraction of long-lived LEFs. Let,  $s$ , be the fold increase in long-lived LEFs' lifetime compared with normal LEFs. To incorporate the effect of the presence of a small fraction of long-lived LEFs on  $P_{\text{constrained}}$ , we use a weighted average processivity to update the average loop size and the fraction of LEF motors extruding in one direction that are bound to BEs:

$$\lambda_{\text{long-lived}} = \alpha_o \cdot s\lambda + (1 - \alpha_o) \cdot \lambda \quad (97)$$

$$z_{\text{long-lived}} = \log_{10}\left(\frac{\lambda_{\text{long-lived}}}{d}\right) \quad (98)$$

$$\begin{aligned} a_{\text{long-lived}} = & -0.08238 + 0.7258z_{\text{long-lived}} - 0.2514z_{\text{long-lived}}^2 \\ & - 0.003995z_{\text{long-lived}}^3 + 0.03445z_{\text{long-lived}}^4 - 0.01077z_{\text{long-lived}}^5 \\ & + 0.001371z_{\text{long-lived}}^6 - 6.472 \cdot 10^{-5}z_{\text{long-lived}}^7 \end{aligned} \quad (99)$$

$$l_{\text{long-lived}} = 10^{a_{\text{long-lived}}} \cdot d \quad (100)$$

$$\frac{[\text{BE-LEF}]}{[\text{LEF}_o]_{\text{long-lived}}} = \begin{cases} \frac{d}{2\bar{D}} + \frac{1}{2} + \frac{d}{b\lambda_{\text{long-lived}}} - \sqrt{\left(\frac{d}{2\bar{D}} + \frac{1}{2} + \frac{d}{b\lambda_{\text{long-lived}}}\right)^2 - \frac{d}{\bar{D}}} & \text{if } b > 0 \\ 0 & \text{if } b = 0 \end{cases} \quad (101)$$

$$\frac{[\text{LEF}]}{[\text{LEF}_o]_{\text{long-lived}}} = 1 - \frac{[\text{BE-LEF}]}{[\text{LEF}_o]_{\text{long-lived}}} \quad (102)$$

Eqs.(100)-(102) in turn update the probability of a DSB happening in loops defined in Eq.(17) to the following:

$$P_{\text{constrained, long-lived}} =$$

$$\begin{cases} \left(1 - e^{-\frac{l_{\text{long-lived}}}{d}}\right) / \left(1 + \frac{[\text{BE-LEF}]}{[\text{LEF}_o]_{\text{long-lived}}} \left(1 - e^{-\frac{l_{\text{long-lived}}}{d}}\right)\right) \cdot \left(\frac{d}{l_{\text{long-lived}}} - 1 + \left(\frac{d}{l_{\text{long-lived}}} + 1\right)e^{-\frac{l_{\text{long-lived}}}{d}}\right) & \text{if } \frac{d}{2} \leq \bar{D} \\ \left(1 - e^{-\frac{l_{\text{long-lived}}}{d}}\right) / \left(1 + \frac{[\text{BE-LEF}]}{[\text{LEF}_o]_{\text{long-lived}}} \frac{[\text{LEF}]}{[\text{LEF}_o]_{\text{long-lived}}} \left(1 - e^{-\frac{l_{\text{long-lived}}}{d}}\right)\right) \cdot \left(\frac{d}{l_{\text{long-lived}}} - 1 + \left(\frac{d}{l_{\text{long-lived}}} + 1\right)e^{-\frac{l_{\text{long-lived}}}{d}}\right) + \left(\frac{[\text{BE-LEF}]}{[\text{LEF}_o]_{\text{long-lived}}}\right)^2 \frac{\bar{D}}{l_{\text{long-lived}}} & \text{if } \frac{d}{2} > \bar{D} \end{cases} \quad (103)$$

Long-lived LEFs are over-represented in the population of constraining LEFs as they extrude larger loops. We therefore approximate the fraction of constraining LEFs that are long-lived LEFs,  $\alpha$ , as the fraction of DNA extruded by long-lived LEFs among the DNA extruded by all LEFs assuming all LEFs are unobstructed:

$$\alpha \approx \frac{\alpha_o \cdot s}{(1 - \alpha_o) + \alpha_o \cdot s} \quad (104)$$

Then PDF of the constraining lifetime will be modified to the following:

$$f_{C,\text{long-lived}}(c) = (1 - \alpha) \cdot \frac{1}{\langle \tau_c \rangle} \exp\left(-\frac{c}{\langle \tau_c \rangle}\right) + \alpha \cdot \frac{1}{\langle \tau_{c,\text{long-lived}} \rangle} \exp\left(-\frac{d}{\langle \tau_{c,\text{long-lived}} \rangle}\right) \quad (105)$$

where:

$$\langle \tau_{c,\text{long-lived}} \rangle = \frac{s\lambda}{2v} \quad (106)$$

As we only consider a small fraction of long-lived LEFs, we neglect its effect on the loading time distribution as a simplifying approximation.

The modified  $f_C$  updates Eqs.(68)-(71) to the following:

$$P_{\text{end-joining|constrained, long-lived}} = \frac{1}{l} \int_0^l [1 - e^{-\frac{l}{d}} + e^{-\frac{l}{d}} A_{\text{long-lived}}(L_{1st})] \cdot \{B_{1,\text{long-lived}}(l - L_{1st}) / [1 - B_{2,\text{long-lived}}(l - L_{1st}) \cdot B_{2,\text{long-lived}}(L_{1st})] + B_{1,\text{long-lived}}(L_{1st}) \cdot B_{2,\text{long-lived}}(l - L_{1st}) / [1 - B_{2,\text{long-lived}}(l - L_{1st}) \cdot B_{2,\text{long-lived}}(L_{1st})]\} dL_{1st} \quad (107)$$

$$A_{\text{long-lived}}(L) = \frac{2v}{L} [\alpha(e^{-\frac{L}{s\lambda}} - e^{-\frac{2L}{s\lambda}}) (\frac{s\lambda}{2v} - \frac{1}{k_{\text{load}} + \frac{2v}{s\lambda}}) + (1 - \alpha)(e^{-\frac{L}{\lambda}} - e^{-\frac{2L}{\lambda}}) (\frac{\lambda}{2v} - \frac{1}{k_{\text{load}} + \frac{2v}{\lambda}})] \quad (108)$$

$$B_{1,\text{long-lived}}(L) = \frac{2v}{L} [\alpha(e^{-\frac{L}{\lambda} \cdot \frac{s+1}{s}} - e^{-\frac{2L}{\lambda} \cdot \frac{s+1}{s}}) (\frac{s\lambda}{2v(s+1)} - \frac{1}{k_{\text{load}} + \frac{2v}{\lambda} \cdot \frac{s+1}{s}}) + (1 - \alpha)(e^{-\frac{2L}{\lambda}} - e^{-\frac{4L}{\lambda}}) (\frac{\lambda}{4v} - \frac{1}{k_{\text{load}} + \frac{4v}{\lambda}})] \quad (109)$$

$$B_{2,\text{long-lived}}(L) = A_{\text{long-lived}}(L) - B_{1,\text{long-lived}}(L) \quad (110)$$

$P_{\text{synapsis, long-lived}}$  can then be computed as:

$$P_{\text{synapsis, long-lived}} = P_{\text{end-joining|constrained, long-lived}} \cdot P_{\text{constrained, long-lived}} \quad (111)$$

Eq.(111) can accurately predict the synapsis efficiency with a small fraction of long-lived LEFs, validating our mechanistic explanation of a small fraction of long-lived LEFs facilitating synapsis by improving the chance of DSB happening inside a loop and increasing the lifetime of constraining LEFs (**Supplementary Note 2 Fig. 8**).

### 2.4.3 Synapsis with LEFs stabilized by DSB ends

Mechanisms that stabilize gap-bridging LEFs will increase the likelihood of simultaneous gap-bridging events on both sides of the DSB. One such mechanism is the stabilization of LEFs by DSB ends which affects the lifetime,  $G$ , of the subpopulation the gap-bridging LEFs that have come into contact with the DSB end. Let,  $r$ , be the fold increase in  $G$ . We note that  $G$  was introduced in Section 2.3.4, to account for the lifetime of gap-bridging LEFs that have already finished gap bridging - therefore, as a first order approximation to simplify our calculations,  $r$  only affects gap-bridging LEFs that have fully bridge  $L_{1st}$ , but does not help promote the initial bridging process. The modified PDF of the gap-bridging LEF lifetime can be written as:

$$f_{G,\text{DSBstabilized}}(g) = \frac{1}{\langle \tau_{g,\text{DSBstabilized}} \rangle} \exp\left(-\frac{g}{\langle \tau_{g,\text{DSBstabilized}} \rangle}\right) \quad (112)$$

in which:

$$\langle \tau_{g,\text{DSBstabilized}} \rangle = \frac{r\lambda}{2v} \quad (113)$$

The modified  $f_G$  updates Eq.(68) and Eqs.(70)-(71) to the following:

Theory predicted and simulated synapsis efficiency with a small fraction of long-lived LEFs

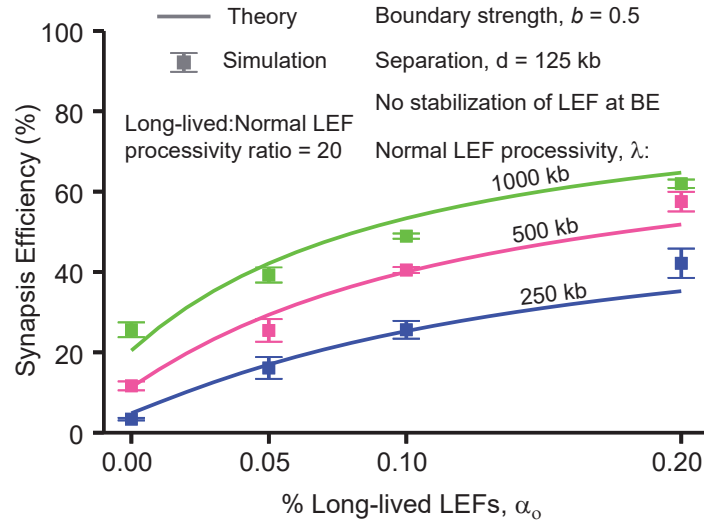

**Supplementary Note 2 Figure 8. Theory predicts the synapsis efficiency with a small fraction of long-lived LEFs.** Same as the bottom panel in main text **Fig. 4B**. The error bars represent the standard error of mean,  $n = 3$  independent simulations, with 218 DSB events per simulation.

$$P_{\text{end-joining|constrained,DSBstabilized}} = \frac{1}{l} \int_0^l [1 - e^{-\frac{l}{d}} + e^{-\frac{l}{d}} A(L_{1st})] \cdot \{B_{1,\text{DSBstabilized}}(l - L_{1st}) / [1 - B_{2,\text{DSBstabilized}}(l - L_{1st}) \cdot B_{2,\text{DSBstabilized}}(L_{1st})] + B_{1,\text{DSBstabilized}}(L_{1st}) \cdot B_{2,\text{DSBstabilized}}(l - L_{1st}) / [1 - B_{2,\text{DSBstabilized}}(l - L_{1st}) \cdot B_{2,\text{DSBstabilized}}(L_{1st})]\} dL_{1st} \quad (114)$$

$$B_{1,\text{DSBstabilized}}(L) = \frac{2v}{L} (e^{-\frac{L}{\lambda} \cdot \frac{r+1}{r}} - e^{-\frac{2L}{\lambda} \cdot \frac{r+1}{r}}) \left( \frac{r\lambda}{2v(r+1)} - \frac{1}{k_{\text{load}} + \frac{2v}{\lambda} \cdot \frac{r+1}{r}} \right) \quad (115)$$

$$B_{2,\text{DSBstabilized}}(L) = A(L) - B_{1,\text{DSBstabilized}}(L) \quad (116)$$

Note that since DSB stabilization is a reactive mechanism that only acts post DSB occurrence, it does not change the probability of DSB occurring in loops. Thus  $P_{\text{synapsis,DSBstabilized}}$  can then be computed as:

$$P_{\text{synapsis,DSBstabilized}} = P_{\text{end-joining|constrained,DSBstabilized}} \cdot P_{\text{constrained,DSBstabilized}} \quad (117)$$

Eq.(117) can accurately predict the synapsis efficiency with DSB stabilization, validating our mechanistic explanation of DSB stabilization facilitating synapsis by increasing chance of simultaneous gap-bridging on both sides of the DSB through prolonged lifetime of gap-bridging LEFs (**Supplementary Note 2 Fig. 9**).

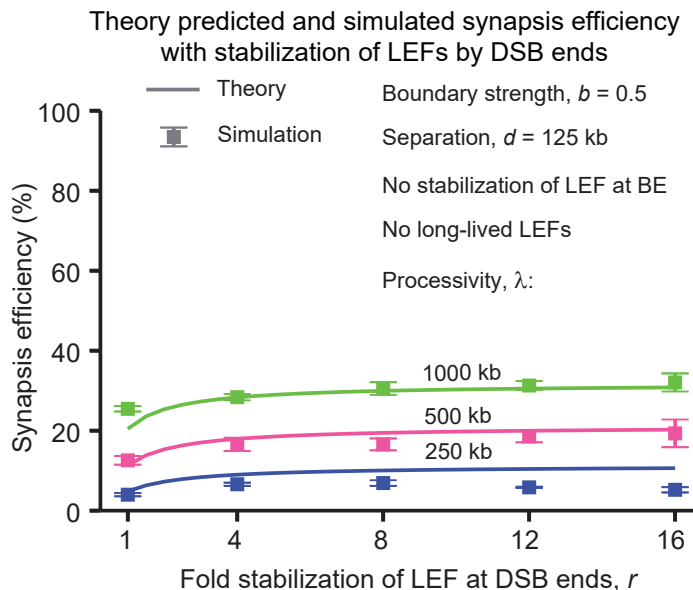

**Supplementary Note 2 Figure 9. Theory predicts the synapsis efficiency with DSB stabilization.** Same as the bottom panel in main text Fig. 4C. The error bars represent the standard error of mean,  $n = 3$  independent simulations, with 218 DSB events per simulation.

#### 2.4.4 Synapsis with targeted loading of LEFs to DSB ends

One mechanism that can reduce  $\tau_{\text{loading}}$  and thereby increase  $P_{\text{end-joining|constrained}}$  is targeted loading of LEFs to the DSB site. Let,  $F$ , be the targeted loading factor (i.e., the fold increase in loading probability at the DSB compared with anywhere else in the genome). Let,  $U$ , be the average distance between two adjacent DSBs in kb, and in all simulations of the paper, we use  $U = 10000$  kb, which corresponds to one DSB occurring every 10 Mb. The PDF of the loading time  $X$  can then be modified as the following:

$$f_{X,\text{targeted}}(x) = k_{\text{load,targeted}} \exp(-k_{\text{load,targeted}}x) = \frac{1}{\langle \tau_{\text{load,targeted}} \rangle} \exp\left(-\frac{x}{\langle \tau_{\text{load,targeted}} \rangle}\right) \quad (118)$$

where:

$$k_{\text{load,targeted}} = \frac{2v}{\lambda} \cdot \frac{(F + L - 1) \cdot U}{(2F + U - 2) \cdot d} \quad (119)$$

The modified  $\langle \tau_{\text{load}} \rangle$  updates Eqs.(68)-(71) to the following:

$$P_{\text{end-joining|constrained,targeted}} = \frac{1}{l} \int_0^l [1 - e^{-\frac{l}{d}} + e^{-\frac{l}{d}} A_{\text{targeted}}(L_{1st})] \cdot \{B_{1,\text{targeted}}(l - L_{1st}) / [1 - B_{2,\text{targeted}}(l - L_{1st}) \cdot B_{2,\text{targeted}}(L_{1st})] + B_{1,\text{targeted}}(L_{1st}) \cdot B_{2,\text{targeted}}(l - L_{1st}) / [1 - B_{2,\text{targeted}}(l - L_{1st}) \cdot B_{2,\text{targeted}}(L_{1st})]\} dL_{1st} \quad (120)$$

$$A_{\text{targeted}}(L) = \frac{2v}{L} (e^{-\frac{L}{\lambda}} - e^{-\frac{2L}{\lambda}}) \left( \frac{\lambda}{2v} - \frac{1}{k_{\text{load,targeted}} + \frac{2v}{\lambda}} \right) \quad (121)$$

$$B_{1,\text{targeted}}(L) = \frac{2v}{L} (e^{-\frac{2L}{\lambda}} - e^{-\frac{4L}{\lambda}}) \left( \frac{\lambda}{4v} - \frac{1}{k_{\text{load,targeted}} + \frac{4v}{\lambda}} \right) \quad (122)$$

$$B_{2,\text{targeted}}(L) = A_{\text{targeted}}(L) - B_{1,\text{targeted}}(L) \quad (123)$$

Like DSB stabilization, targeted loading is also a reactive mechanism that only acts post DSB occurrence, it does not change the probability of DSB occurring in loops. Thus  $P_{\text{synapsis,targeted}}$  can then be computed as:

$$P_{\text{synapsis,targeted}} = P_{\text{end-joining|constrained}} \cdot P_{\text{constrained,targeted}} \quad (124)$$

Eq.(124) can accurately predict the synapsis efficiency with targeted loading of LEFs at DSB, validating our mechanistic explanation of targeted loading facilitating synapsis by reducing  $\tau_{\text{loading}}$  (**Supplementary Note 2 Fig. 10**)

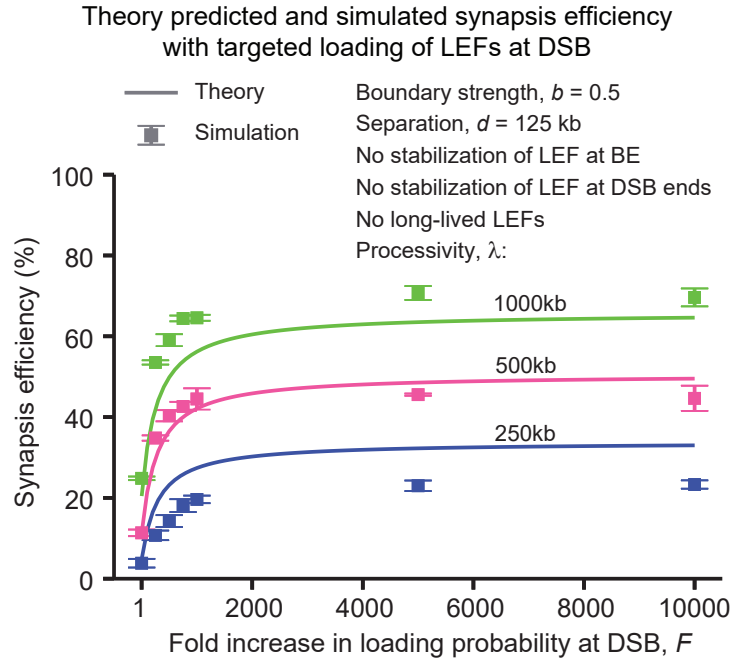

**Supplementary Note 2 Figure 10. Theory predicts the synopsis efficiency with targeted loading of LEFs at DSB.** Same as main text Fig. 5B. The error bars represent the standard error of mean,  $n = 3$  independent simulations, with 218 DSB events per simulation.

#### 2.4.5 Synopsis with all four mechanisms combined

Now that we have explored how individual mechanisms facilitate synopsis, we can determine their combined effects. Only BE stabilization and the presence of long-lived LEFs affect  $P_{\text{constrained}}$ , as both DSB stabilization and targeted loading are reactive mechanisms. To determine the combined effect of BE stabilization and the presence of long-lived on  $P_{\text{constrained}}$  without further complicating the mathematical form of the solutions and to maximally utilize the framework developed above, we first replace  $\lambda$  in Eq.(81) with the weighted average  $\lambda_{\text{long-lived}}$  defined in Eq.(97) to obtain an updated expression of  $\frac{[\text{BE-LEF}]}{[\text{LEF}_o]}$  and  $\frac{[\text{LEF}]}{[\text{LEF}_o]}$ :

$$\frac{[\text{BE-LEF}]}{[\text{LEF}_o]}_{\text{combined}} = \begin{cases} \frac{d}{2D} + \frac{1}{2} + \frac{d}{bw\lambda_{\text{long-lived}}} - \sqrt{\left(\frac{d}{2D} + \frac{1}{2} + \frac{d}{bw\lambda_{\text{long-lived}}}\right)^2 - \frac{d}{D}} & \text{if } b > 0 \\ 0 & \text{if } b = 0 \end{cases} \quad (125)$$

$$\frac{[\text{LEF}]}{[\text{LEF}_o]}_{\text{combined}} = 1 - \frac{[\text{BE-LEF}]}{[\text{LEF}_o]}_{\text{combined}} \quad (126)$$

Then the fraction of LEFs stabilized by BEs,  $\beta$ , can be updated accordingly:

$$\beta_{\text{combined}} = 1 - \left(1 - \frac{[\text{BE-LEF}]}{[\text{LEF}_o]}_{\text{combined}}\right)^2 \quad (127)$$

Now we can use the following weighted average processivity to calculate the average loop size, as an approximation of the combined effect of BE stabilization and long-lived LEFs on  $P_{\text{constrained}}$ :

$$\lambda_{\text{combined}} = \beta_{\text{combined}} \cdot w\lambda_{\text{long-lived}} + (1 - \beta_{\text{combined}}) \cdot \lambda_{\text{long-lived}} \quad (128)$$

$$z_{\text{combined}} = \log_{10}\left(\frac{\lambda_{\text{combined}}}{d}\right) \quad (129)$$

$$\begin{aligned} a_{\text{combined}} = & -0.08238 + 0.7258z_{\text{combined}} - 0.2514z_{\text{combined}}^2 \\ & - 0.003995z_{\text{combined}}^3 + 0.03445z_{\text{combined}}^4 - 0.01077z_{\text{combined}}^5 \\ & + 0.001371z_{\text{combined}}^6 - 6.472 \cdot 10^{-5}z_{\text{combined}}^7 \end{aligned} \quad (130)$$

$$l_{\text{combined}} = 10^{a_{\text{combined}}} \cdot d \quad (131)$$



Eqs.(125)-(126) and Eq.(131) in turn update the probability of DSB happening in loops defined in Eq.(17) to the following:

$$P_{\text{constrained,combined}} = \begin{cases} \left( \frac{1 - e^{-\frac{l_{\text{combined}}}{d}}}{\frac{l_{\text{combined}}}{d} - 1 + \left(\frac{d}{l_{\text{combined}}} + 1\right)e^{-\frac{d}{l_{\text{combined}}}} \right) / \left( 1 + \frac{[\text{BE-LEF}]_{\text{combined}}}{[\text{LEF}_0]_{\text{combined}}} (1 - e^{-\frac{d}{l_{\text{combined}}}}) \right) & \text{if } \frac{d}{2} \leq \bar{D} \\ \left( \frac{1 - e^{-\frac{l_{\text{combined}}}{d}}}{\frac{l_{\text{combined}}}{d} - 1 + \left(\frac{d}{l_{\text{combined}}} + 1\right)e^{-\frac{d}{l_{\text{combined}}}} \right) / \left( 1 + \frac{[\text{BE-LEF}]_{\text{combined}}}{[\text{LEF}_0]_{\text{combined}}} \frac{[\text{LEF}]_{\text{combined}}}{[\text{LEF}_0]_{\text{combined}}} (1 - e^{-\frac{d}{l_{\text{combined}}}}) \right) + \left( \frac{[\text{BE-LEF}]_{\text{combined}}}{[\text{LEF}_0]_{\text{combined}}} \right)^2 \frac{\bar{D}}{l_{\text{combined}}} & \text{if } \frac{d}{2} > \bar{D} \end{cases} \quad (132)$$

For simplicity, we neglect the effects of BE and DSB stabilization, and long-lived LEFs on the loading time as an approximation:

$$k_{\text{load,combined}} = k_{\text{load,targeted}} \quad (133)$$

$$f_{X,\text{combined}}(x) = k_{\text{load,combined}} \exp(-k_{\text{load,combined}}x) = k_{\text{load,targeted}} \exp(-k_{\text{load,targeted}}x) \quad (134)$$

We approximated the combined effect of long-lived LEFs and BE stabilization on the constraining LEF lifetime distribution as the following:

$$f_{C,\text{combined}}(c) = (1 - \alpha) \cdot \frac{1}{\langle \tau_{c1} \rangle} \exp\left(-\frac{c}{\langle \tau_{c1} \rangle}\right) + \alpha \cdot \frac{1}{\langle \tau_{c2} \rangle} \exp\left(-\frac{c}{\langle \tau_{c2} \rangle}\right) \quad (135)$$

in which:

$$\langle \tau_{c1} \rangle = \frac{w\lambda}{2v} \quad (136)$$

$$\langle \tau_{c2} \rangle = \frac{ws\lambda}{2v} \quad (137)$$

As an approximation, we neglect the scenario of long-lived LEFs acting as gap-bridging LEFs, since long-lived LEFs are much less likely to be loaded at a DSB to function as gap-bridging LEFs given their slow dynamics. Thus the PDF of the gap-bridging LEF lifetime remains the same as Eq.(112):

$$f_{G,\text{combined}}(g) = \frac{1}{\langle \tau_{g,\text{DSBstabilized}} \rangle} \exp\left(-\frac{g}{\langle \tau_{g,\text{DSBstabilized}} \rangle}\right) \quad (138)$$

Subsequently, with all four mechanisms combined, Eqs.(68)-(71) are modified to the following:

$$P_{\text{end-joining|constrained,combined}} = \frac{1}{l} \int_0^l [1 - e^{-\frac{l}{d}} + e^{-\frac{l}{d}} A_{\text{combined}}(L_{1st})] \cdot \{B_{1,\text{combined}}(l - L_{1st}) / [1 - B_{2,\text{combined}}(l - L_{1st}) \cdot B_{2,\text{combined}}(L_{1st})] + B_{1,\text{combined}}(L_{1st}) \cdot B_{2,\text{combined}}(l - L_{1st}) / [1 - B_{2,\text{combined}}(l - L_{1st}) \cdot B_{2,\text{combined}}(L_{1st})]\} dL_{1st} \quad (139)$$

$$A_{\text{combined}}(L) = \frac{2v}{L} [\alpha (e^{-\frac{L}{ws\lambda}} - e^{-\frac{2L}{ws\lambda}}) \left( \frac{ws\lambda}{2v} - \frac{1}{k_{\text{load,targeted}} + \frac{2v}{ws\lambda}} \right) + (1 - \alpha) (e^{-\frac{L}{w\lambda}} - e^{-\frac{2L}{w\lambda}}) \left( \frac{w\lambda}{2v} - \frac{1}{k_{\text{load,targeted}} + \frac{2v}{w\lambda}} \right)] \quad (140)$$

$$B_{1,\text{combined}}(L) = \frac{2v}{L} [\alpha (e^{-\frac{L}{\lambda} \cdot \frac{ws+r}{wsr}} - e^{-\frac{2L}{\lambda} \cdot \frac{ws+r}{wsr}}) \left( \frac{wsr\lambda}{2v(ws+r)} - \frac{1}{k_{\text{load,targeted}} + \frac{2v}{\lambda} \cdot \frac{ws+r}{wsr}} \right) + (1 - \alpha) (e^{-\frac{L}{\lambda} \cdot \frac{w+r}{wr}} - e^{-\frac{2L}{\lambda} \cdot \frac{w+r}{wr}}) \left( \frac{wr\lambda}{2v(w+r)} - \frac{1}{k_{\text{load,targeted}} + \frac{2v}{\lambda} \cdot \frac{w+r}{wr}} \right)] \quad (141)$$

$$B_{2,\text{combined}}(L) = A_{\text{combined}}(L) - B_{1,\text{combined}}(L) \quad (142)$$

$P_{\text{end-joining|constrained,combined}}$  can now be calculated by substituting Eqs.(140)-(142) into Eq.(139) and performing numerical integration (see examples in the Mathematica notebooks in **Supplementary Materials**).

$P_{\text{synapsis,combined}}$  can then be computed as:

$$P_{\text{synapsis,combined}} = P_{\text{end-joining|constrained,combined}} \cdot P_{\text{constrained,combined}} \quad (143)$$

Eq.(143) can predict the synapsis efficiency with all four additional mechanisms combined with reasonable accuracy, supporting our mechanistic explanation of how these mechanisms come together to facilitate DSB end synapsis (**Supplementary Note 2 Fig. 11**).

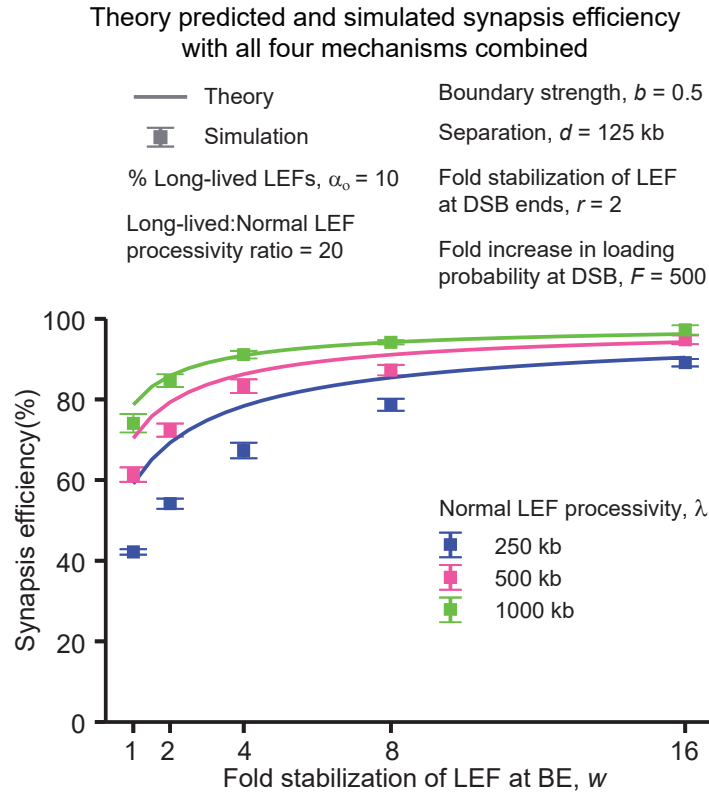

**Supplementary Note 2 Figure 11. Theory predicts the synapsis efficiency with all four additional mechanisms combined.** The error bars represent the standard error of mean,  $n = 3$  independent simulations, with 218 DSB events per simulation.

## 2.5 Simplified expression for the probability of synapsis with four additional mechanisms

We can derive the simplified expression for the probability of synapsis with all four mechanisms combined.

For  $P_{\text{constrain,combined}}$ , we can first apply the same linear approximation (tangent line approximation) of  $\frac{[\text{BE-LEF}]}{[\text{LEF}_0]}$  used to obtain Eq.(32):

$P_{\text{constrained,combined}} \approx$

$$\begin{cases} (1 - e^{-\frac{l_{\text{combined}}}{d}}) / \left(1 + \frac{(1 - e^{-\frac{d}{l_{\text{combined}}}}) (\frac{d}{l_{\text{combined}}} - 1 + (\frac{d}{l_{\text{combined}}} + 1) e^{-\frac{d}{l_{\text{combined}}}})}{1 + \frac{\bar{D}}{d} + \frac{2\bar{D}}{bw\lambda_{\text{long-lived}}}}\right) & \text{if } \frac{d}{2} \leq \bar{D} \\ (1 - e^{-\frac{l_{\text{combined}}}{d}}) / \left(1 + \frac{(\frac{\bar{D}}{d} + \frac{2\bar{D}}{bw\lambda_{\text{long-lived}}}) (1 - e^{-\frac{d}{l_{\text{combined}}}}) (\frac{d}{l_{\text{combined}}} - 1 + (\frac{d}{l_{\text{combined}}} + 1) e^{-\frac{d}{l_{\text{combined}}}}) + \frac{\bar{D}}{l_{\text{combined}}}}{(1 + \frac{\bar{D}}{d} + \frac{2\bar{D}}{bw\lambda_{\text{long-lived}}})^2}\right) & \text{if } \frac{d}{2} > \bar{D} \end{cases} \quad (144)$$

For  $P_{\text{end-joining|constrained,combined}}$ , similar to above, we can simplify by considering the scenario where gaps are bridged upon the first try (before the first gap-bridging LEF falls off), with gap length  $L_{1st}$  and  $L_{2nd}$  on two sides of the DSB. We assume no gap-bridging LEFs are present within the constraining LEF at the time of DSB occurrence. Then  $P_{\text{end-joining|constrained,combined}}$  can be approximated as the following:

$$\begin{aligned}
P_{\text{end-joining|constrained,combined}} &\approx A_{\text{combined}}\left(\frac{l}{2}\right) \cdot B_{1,\text{combined}}\left(\frac{l}{2}\right) \\
&= \frac{v}{l} \left[ \alpha \left( e^{-\frac{l}{2ws\lambda}} - e^{-\frac{l}{ws\lambda}} \right) \left( \frac{ws\lambda}{2v} - \frac{1}{k_{\text{load,targeted}} + \frac{2v}{ws\lambda}} \right) + \right. \\
&(1 - \alpha) \left( e^{-\frac{l}{2w\lambda}} - e^{-\frac{l}{w\lambda}} \right) \left. \left( \frac{w\lambda}{2v} - \frac{1}{k_{\text{load,targeted}} + \frac{2v}{w\lambda}} \right) \right] \cdot \\
&\frac{v}{l} \left[ \alpha \left( e^{-\frac{l}{2\lambda} \cdot \frac{ws+r}{wsr}} - e^{-\frac{l}{\lambda} \cdot \frac{ws+r}{wsr}} \right) \left( \frac{wsr\lambda}{2v(ws+r)} - \frac{1}{k_{\text{load,targeted}} + \frac{2v}{\lambda} \cdot \frac{ws+r}{wsr}} \right) + \right. \\
&(1 - \alpha) \left( e^{-\frac{l}{2\lambda} \cdot \frac{w+r}{wr}} - e^{-\frac{l}{\lambda} \cdot \frac{w+r}{wr}} \right) \left. \left( \frac{wr\lambda}{2v(w+r)} - \frac{1}{k_{\text{load,targeted}} + \frac{2v}{\lambda} \cdot \frac{w+r}{wr}} \right) \right] \\
&= \left[ \frac{\alpha (ws\tau_{\text{constrained}})^2}{\tau_{\text{extrusion}} (\tau_{\text{loading,targeted}} + ws\tau_{\text{constrained}})} \left( e^{-\frac{\tau_{\text{extrusion}}}{ws\tau_{\text{constrained}}}} - e^{-\frac{2\tau_{\text{extrusion}}}{ws\tau_{\text{constrained}}}} \right) + \right. \\
&\frac{(1 - \alpha) (w\tau_{\text{constrained}})^2}{\tau_{\text{extrusion}} (\tau_{\text{loading,targeted}} + w\tau_{\text{constrained}})} \left. \left( e^{-\frac{\tau_{\text{extrusion}}}{w\tau_{\text{constrained}}}} - e^{-\frac{2\tau_{\text{extrusion}}}{w\tau_{\text{constrained}}}} \right) \right] \cdot \\
&\left[ \frac{\alpha \left( \frac{wsr}{ws+r} \tau_{\text{constrained}} \right)^2}{\tau_{\text{extrusion}} (\tau_{\text{loading,targeted}} + \frac{wsr}{ws+r} \tau_{\text{constrained}})} \left( e^{-\frac{\tau_{\text{extrusion}}}{\frac{wsr}{ws+r} \tau_{\text{constrained}}}} - e^{-\frac{2\tau_{\text{extrusion}}}{\frac{wsr}{ws+r} \tau_{\text{constrained}}}} \right) + \right. \\
&\frac{(1 - \alpha) \left( \frac{wr}{w+r} \tau_{\text{constrained}} \right)^2}{\tau_{\text{extrusion}} (\tau_{\text{loading,targeted}} + \frac{wr}{w+r} \tau_{\text{constrained}})} \left. \left( e^{-\frac{\tau_{\text{extrusion}}}{\frac{wr}{w+r} \tau_{\text{constrained}}}} - e^{-\frac{2\tau_{\text{extrusion}}}{\frac{wr}{w+r} \tau_{\text{constrained}}}} \right) \right] \\
&= \left[ \frac{\alpha f\left(\frac{\tau_{\text{extrusion}}}{ws\tau_{\text{constrained}}}\right)}{1 + \frac{\tau_{\text{loading,targeted}}}{ws\tau_{\text{constrained}}}} + \frac{(1 - \alpha) f\left(\frac{\tau_{\text{extrusion}}}{w\tau_{\text{constrained}}}\right)}{1 + \frac{\tau_{\text{loading,targeted}}}{w\tau_{\text{constrained}}}} \right] \cdot \left[ \frac{\alpha f\left(\frac{\tau_{\text{extrusion}}}{\frac{wsr}{ws+r} \tau_{\text{constrained}}}\right)}{1 + \frac{\tau_{\text{loading,targeted}}}{\frac{wsr}{ws+r} \tau_{\text{constrained}}}} + \frac{(1 - \alpha) f\left(\frac{\tau_{\text{extrusion}}}{\frac{wr}{w+r} \tau_{\text{constrained}}}\right)}{1 + \frac{\tau_{\text{loading,targeted}}}{\frac{wr}{w+r} \tau_{\text{constrained}}}} \right] \quad (145)
\end{aligned}$$

where:

$$\begin{aligned}
\tau_{\text{loading,targeted}} &= \frac{1}{k_{\text{load,targeted}}} \\
&= \frac{\lambda}{2v} \cdot \frac{(2F + U - 2) \cdot d}{(F + \frac{l}{2} - 1) \cdot U} \quad (146)
\end{aligned}$$

Now we can write the simplified expression for  $P_{\text{synopsis, combined}}$ :

$$\begin{aligned}
P_{\text{synopsis,combined}} &\approx \\
&\begin{cases} \left( 1 - e^{-\frac{l_{\text{combined}}}{d}} \right) / \left( 1 + \frac{(1 - e^{-\frac{d}{l_{\text{combined}}}) \left( \frac{d}{l_{\text{combined}}} - 1 + \left( \frac{d}{l_{\text{combined}}} + 1 \right) e^{-\frac{d}{l_{\text{combined}}}} \right)}{1 + \frac{D}{d} + \frac{2D}{bw\lambda_{\text{long-lived}}}} \right) \cdot \left[ \frac{\alpha f\left(\frac{\tau_{\text{extrusion}}}{ws\tau_{\text{constrained}}}\right)}{1 + \frac{\tau_{\text{loading,targeted}}}{ws\tau_{\text{constrained}}}} + \frac{(1 - \alpha) f\left(\frac{\tau_{\text{extrusion}}}{w\tau_{\text{constrained}}}\right)}{1 + \frac{\tau_{\text{loading,targeted}}}{w\tau_{\text{constrained}}}} \right] \cdot \left[ \frac{\alpha f\left(\frac{\tau_{\text{extrusion}}}{\frac{wsr}{ws+r} \tau_{\text{constrained}}}\right)}{1 + \frac{\tau_{\text{loading,targeted}}}{\frac{wsr}{ws+r} \tau_{\text{constrained}}}} + \frac{(1 - \alpha) f\left(\frac{\tau_{\text{extrusion}}}{\frac{wr}{w+r} \tau_{\text{constrained}}}\right)}{1 + \frac{\tau_{\text{loading,targeted}}}{\frac{wr}{w+r} \tau_{\text{constrained}}}} \right] & \text{if } \frac{d}{2} \leq \bar{D} \\ \left( 1 - e^{-\frac{l_{\text{combined}}}{d}} \right) / \left( 1 + \frac{\left( \frac{D}{d} + \frac{2D}{bw\lambda_{\text{long-lived}}} \right) (1 - e^{-\frac{d}{l_{\text{combined}}}) \left( \frac{d}{l_{\text{combined}}} - 1 + \left( \frac{d}{l_{\text{combined}}} + 1 \right) e^{-\frac{d}{l_{\text{combined}}}} \right) + \frac{D}{l_{\text{combined}}}}{\left( 1 + \frac{D}{d} + \frac{2D}{bw\lambda_{\text{long-lived}}} \right)^2} \right) \cdot \left[ \frac{\alpha f\left(\frac{\tau_{\text{extrusion}}}{ws\tau_{\text{constrained}}}\right)}{1 + \frac{\tau_{\text{loading,targeted}}}{ws\tau_{\text{constrained}}}} + \frac{(1 - \alpha) f\left(\frac{\tau_{\text{extrusion}}}{w\tau_{\text{constrained}}}\right)}{1 + \frac{\tau_{\text{loading,targeted}}}{w\tau_{\text{constrained}}}} \right] \cdot \left[ \frac{\alpha f\left(\frac{\tau_{\text{extrusion}}}{\frac{wsr}{ws+r} \tau_{\text{constrained}}}\right)}{1 + \frac{\tau_{\text{loading,targeted}}}{\frac{wsr}{ws+r} \tau_{\text{constrained}}}} + \frac{(1 - \alpha) f\left(\frac{\tau_{\text{extrusion}}}{\frac{wr}{w+r} \tau_{\text{constrained}}}\right)}{1 + \frac{\tau_{\text{loading,targeted}}}{\frac{wr}{w+r} \tau_{\text{constrained}}}} \right] & \text{if } \frac{d}{2} > \bar{D} \end{cases} \quad (147)
\end{aligned}$$

## 2.6 Two important relative timescales underpinning synopsis efficiency

Since estimates based on experimental evidence suggest that most of the interphase DNA is inside loops at any given time ([15, 17, 18]),  $P_{\text{constrained,combined}}$  is likely close to 1. Thus achieving close-to-perfect synopsis efficiency hinges on  $P_{\text{end-joining|constrained,combined}}$ . We next ask what factors underlying  $P_{\text{end-joining|constrained,combined}}$  have the most dominant impact on synopsis efficiency. Notice the recurrent terms,  $\frac{\tau_{\text{loading}}}{\tau_{\text{constrained}}}$  and  $\frac{\tau_{\text{extrusion}}}{\tau_{\text{constrained}}}$ , with different prefactors in Eq.(145), we define the following weighted relative timescales:

$$\begin{aligned}
\left( \frac{\tau_{\text{loading}}}{\tau_{\text{constrained}}} \right)_{\text{weighted}} &= \left\{ \left[ \frac{\alpha}{ws} \frac{\tau_{\text{loading,targeted}}}{\tau_{\text{constrained}}} + \frac{1 - \alpha}{w} \frac{\tau_{\text{loading,targeted}}}{\tau_{\text{constrained}}} \right] \cdot \right. \\
&\left. \left[ \alpha \left( \frac{1}{ws} + \frac{1}{r} \right) \frac{\tau_{\text{loading,targeted}}}{\tau_{\text{constrained}}} + (1 - \alpha) \left( \frac{1}{w} + \frac{1}{r} \right) \frac{\tau_{\text{loading,targeted}}}{\tau_{\text{constrained}}} \right] \right\}^{0.5} \quad (148)
\end{aligned}$$

$$\begin{aligned}
\left( \frac{\tau_{\text{extrusion}}}{\tau_{\text{constrained}}} \right)_{\text{weighted}} &= \left\{ \left[ \frac{\alpha}{ws} \frac{\tau_{\text{extrusion}}}{\tau_{\text{constrained}}} + \frac{1 - \alpha}{w} \frac{\tau_{\text{extrusion}}}{\tau_{\text{constrained}}} \right] \cdot \right. \\
&\left. \left[ \alpha \left( \frac{1}{ws} + \frac{1}{r} \right) \frac{\tau_{\text{extrusion}}}{\tau_{\text{constrained}}} + (1 - \alpha) \left( \frac{1}{w} + \frac{1}{r} \right) \frac{\tau_{\text{extrusion}}}{\tau_{\text{constrained}}} \right] \right\}^{0.5} \quad (149)
\end{aligned}$$

On top of our theoretical framework, we also used 1D simulations to determine whether all four mechanisms could combine to improve synapsis efficiency. We added processivity/separation as an additional dimension, resulting in a 5-dimensional parameter scan with 768 different parameter combinations (see main text **Fig. 6A**). The two weighted relative timescales in Eqs.(148)-(149) can effectively separate the 5-dimensional parameter scan simulation data points based on synapsis efficiency, suggesting lowering the two relative timescales is key to improving synapsis efficiency (**Supplementary Note 2 Fig. 12**).

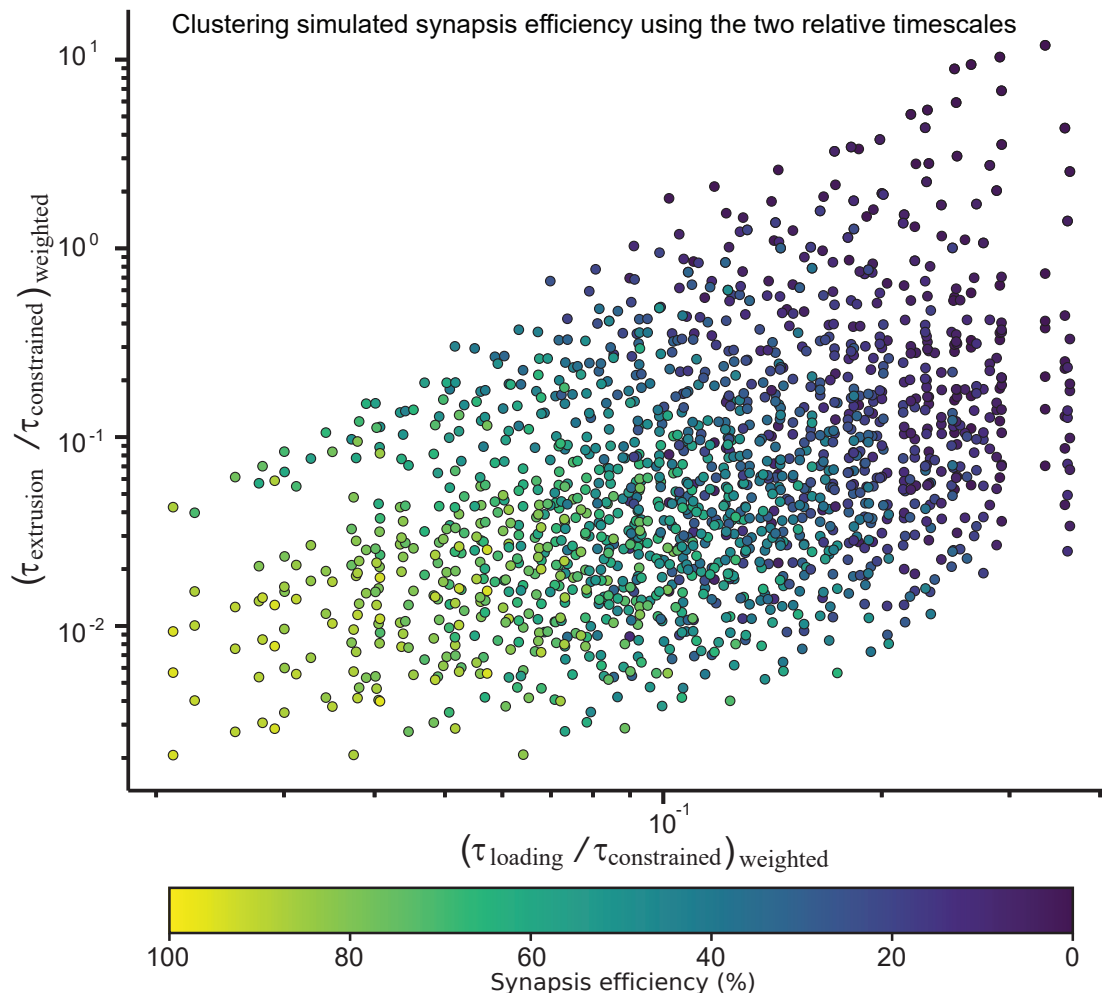

**Supplementary Note 2 Figure 12. The two relative timescales can effectively cluster simulation data points according to their synapsis efficiency.** Same as main text **Fig. 6B**. The color of each data point shows the average synapsis efficiency of  $n = 3$  independent simulations for a given parameter combination, with 218 DSB events per simulation. The two relative timescales for each data point are calculated using Eqs.(148)-(149) based on the input parameters.

## 2.7 Limitations of our analytical theory

Despite the close agreement between our theory prediction of synapsis efficiency and the simulation results in the parameter space bounded by experimental estimates (see **Supplementary Note 3**), it is worth pointing out several important assumptions and approximations made to simplify the mathematical form of the analytical solution:

1. We assume the prolonged LEF lifetime due to additional mechanisms (BE and DSB stabilization, and long-lived LEFs) does not affect the loading time  $Y$ . While the accuracy of predictions is largely unaffected by this assumption when  $\lambda > d$  as shown above, the assumption no longer holds when  $\lambda \leq d$  as the prolonged lifetime for a fraction of LEFs reduces the pool of dynamic LEFs that can be quickly loaded at DSB, leading to overestimation of synapsis efficiency (**Supplementary Note 2 Supplementary Fig. 13**).

2. We assume that only one gap-bridging LEF is bridging the gap on each side of the DSB for the calculation of the first-passage time  $T$ . This assumption no longer holds when  $\lambda \gg d$  and leads to underestimation of synapsis efficiency (top right corner of the heatmaps in **Supplementary Note 2 Fig. 3** where  $\lambda = 16d$ ).

3. We assume if one or more gap-bridging LEFs are present within the constraining LEF at the time of DSB occurrence, one of the two gaps is bridged already. While a seemingly crude approximation to account for the pre-existing gap-bridging LEFs' impact on synapsis, this assumption does not significantly affect the accuracy of theory prediction.

Perhaps the most significant limitation of our theory is that we neglect the effect of passive 3D diffusion. While we estimate the time it takes for 3D diffusion alone to bring two DSB ends back into proximity is likely too long to be consistent with the synapsis timescale, 3D diffusion likely acts concurrently and synergistically with loop extrusion to further improve synapsis efficiency. When the two DSB ends are brought close enough by loop extrusion, the chance of the two DSB ends randomly encountering each other through passive diffusion also greatly increases. Therefore, the synapsis efficiency predicted by our theory likely delineates the lower bound of the physiological synapsis efficiency.

Finally, we have also made several biological assumptions that abstract the complex synapsis process into a simplified picture more tractable for theoretical analysis:

1. We assume uniform loading probability of LEFs across the genome aside from DSB ends. While it remains unclear to what extent cohesins show preferential loading to certain genomic regions, previous work suggests that cohesin loading may not be uniform across the genome [19–21].

2. We assume uniform LEF extrusion speed throughout the genome and that only BEs may stall LEF extrusion, while it has been shown that other non-BE elements such as RNA polymerases could also act as partial extrusion barriers [19, 22, 23].

3. We assume a uniform probability of DSB formation throughout the genome, while evidence suggests certain sites such as binding sites for CTCF and cohesin are more prone to generate DSBs [24–28]. Since DSB sites close to CTCF likely benefit more from BE stabilization to improve synapsis efficiency, and DSB sites close to cohesin binding sites are more likely to be constrained by LEFs and have gap-bridging LEFs loaded in the gaps to improve synapsis efficiency, our theory might underestimate the physiological synapsis efficiency by assuming a uniform probability of DSB formation.

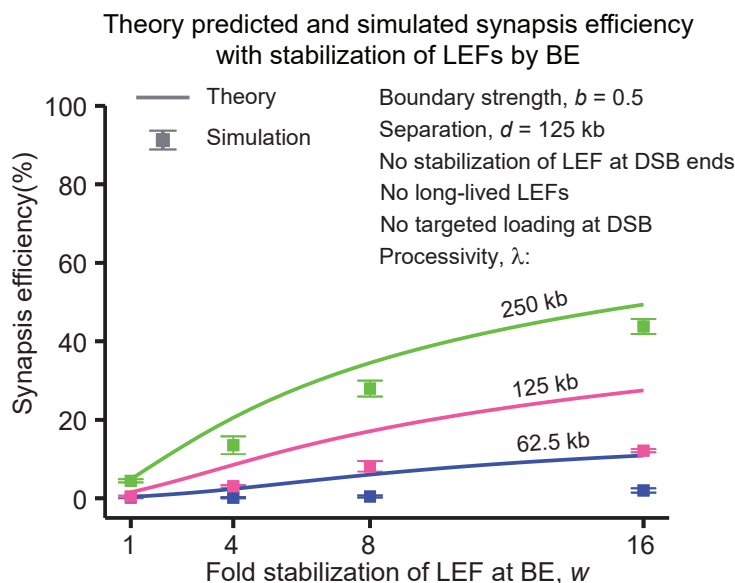

**Supplementary Note 2 Figure 13. Theory overestimates the synapsis efficiency when  $\lambda \leq d$ .** The error bars represent the standard error of mean,  $n = 3$  independent simulations, with 218 DSB events per simulation.

## 2.8 Conclusion

In conclusion, we built a probabilistic theoretical model with a relatively simple mathematical form, that can predict the simulated synapsis efficiency in the parameter regime with  $\lambda > d$  with a fairly good accuracy. Our theory highlights two important roles of loop extrusion in synapsis: LEFs can constrain DSB ends and thereby prevent them from diffusing apart, and gap-bridging LEFs can mediate synapsis by bringing the DSB ends back together. Since DSB ends can only be joined by loop extrusion if the DSB occurs inside a loop, loop coverage of the genome is crucial to achieve high synapsis efficiency. Mechanisms that stabilize LEFs before the DSB occurs such as BE stabilization and the presence of a small fraction of long-lived LEFs could serve to improve the coverage of the genome by LEFs. Provided that the DSB ends are constrained, our theory then points to two relative timescales,

$\frac{\tau_{\text{loading}}}{\tau_{\text{constrained}}}$  and  $\frac{\tau_{\text{extrusion}}}{\tau_{\text{constrained}}}$  that underlie synapsis efficiency. By extending our simple theory with 4 physiologically plausible mechanisms, we show how each of the four mechanisms decreases the two relative timescales and thereby improves synapsis efficiency. The final expressions with all four mechanisms combined illustrate the synergistic effects of the mechanisms. Despite the various approximations made in deriving the theory, the relatively good agreement between our analytical theory and simulations lends credibility to our mechanistic insights obtained from our theoretical model.

Our theory can also serve to guide experimental perturbation of the DSB synapsis machinery for further validation the role of different extended mechanisms discussed above, and to explain observations of the perturbations' impact on synapsis efficiency. Our theory has direct implications for the dependence of DSB repair efficiency on genomic context. For example, our theory points to the importance of BE stabilization in efficient synapsis, which predicts reduced synapsis efficiency in genomic region that lacks BEs (CTCF binding sites etc.). Indeed, heterochromatin, which usually has lower density of bound CTCF binding sites, has been shown to be more sensitive to radiation-induced chromosomal aberrations than euchromatin in Chinese hamster cells [29], consistent with our theory prediction.

### 3 Supplementary Note 3

#### Overview

Given the large possible parameter space for individual variables considered in our simulations and modeling as well as the vast parameter combinations generated by permutation, we sought to use prior experimental estimates to generate plausible upper and lower bounds on individual parameter values. In this Supplementary Note, we detail the calculations used to justify the parameter bounds chosen in our study.

#### 3.1 Estimation of the range of LEF separation and processivity

Two studies performed absolute quantification of CTCF and cohesin in HeLa cells [18] and mouse embryonic stem cells (mESCs) [17]. Since in simulations we assume LEFs re-load somewhere on the genome immediately after unloading, we could use the density of chromatin-bound cohesin to estimate the LEF separation,  $d$  (the inverse of LEF density).

Using fluorescence-correlation spectroscopy (FCS) and fluorescence recovery after photobleaching (FRAP), the chromatin-bound SCC1(subunit of cohesin) copy number has been estimated to be  $\sim 160,000$  for HeLa cells [18]. Considering the total HeLa genome length of 7.9 Gb [18], we can estimate the cohesin separation as the following, assuming cohesin exists as monomeric ring [30]:

$$\begin{aligned} d_{\text{Holzmann,monomer}} &= (7.9 \cdot 10^9 \text{bp})/160000 \\ &\approx 50 \text{ kb} \end{aligned} \tag{150}$$

If we assume cohesin extrudes as dimers, then [30]:

$$\begin{aligned} d_{\text{Holzmann,dimer}} &= d_{\text{Holzmann,dimer}} \cdot 2 \\ &= 100 \text{ kb} \end{aligned} \tag{151}$$

Through a combination of FCS, "in-gel" fluorescence, and flow cytometry, we previously carried out an absolute quantification of CTCF and cohesin in mESCs. We estimated the cohesin density to be 5.3 per Mb (assuming monomeric) or 2.7 per Mb (assuming dimeric) [17, 30], which correspond to the following cohesin separation:

$$\begin{aligned} d_{\text{Cattoglio,monomer}} &= 1\text{Mb}/5.3 \\ &\approx 190 \text{ kb} \end{aligned} \tag{152}$$

$$\begin{aligned} d_{\text{Cattoglio,dimer}} &= 1\text{Mb}/2.7 \\ &\approx 370 \text{ kb} \end{aligned} \tag{153}$$

Thus far, absolute quantification of cohesin has only been performed in two mammalian cell types, HeLa and mESC. As can be seen, the density varies substantially between these two cell types, and may vary even more among other cell types. It is therefore associated with significant uncertainty. Nevertheless, these two studies bound the LEF separations in the following range:

$$d \in [50 \text{ kb}, 370 \text{ kb}] \tag{154}$$

Let,  $\tau_o$ , be the LEF lifetime (residence time). Let  $v_T$ , be the total unobstructed LEF extrusion speed. Then for the two-sided LEFs considered in our study,  $v_T = 2v$ , where  $v$  is the unobstructed extrusion speed in one direction.

Then LEF processivity can be computed as the product of total extrusion speed (in both directions) and the LEF lifetime:

$$\lambda = v_T \cdot \tau_o \quad (155)$$

Several single-molecule experiments for condensins and cohesins [31–35] measured the unobstructed total extrusion speed to be in the range of  $v_T \in [0.5 \text{ kb/s}, 2 \text{ kb/s}]$ . Note that the extrusion speed estimated from *in vivo* measurement is often slower [30, 36, 37], likely due to various protein roadblocks bound to DNA including BEs like CTCF. While synapsis time calculated from our simulations is inversely proportional to extrusion speed, synapsis efficiency is independent of extrusion speed. Unless otherwise specified, we use  $v_T$  of 1 kb/s for the calculation of synapsis time.

Multiple studies have estimated cohesin’s residence time which varies with cell cycle phase. Focusing on G1, we estimated cohesin’s residence time to be  $\sim 22$  minutes in mESCs [38], whereas Holzmann *et al.* estimated it to be  $\sim 13.7$  minutes in HeLa cells [18]. In contrast, the residence time of condensin I was determined by FRAP to be  $\sim 2$  minutes [39]. Thus the bounds of  $v_T$  and  $\tau_o$  estimated from these studies provide the following range of LEF processivity given Eq.(155):

$$\lambda \in [60 \text{ kb}, 2640 \text{ kb}] \quad (156)$$

Given the estimated bounds of LEF separation and processivity in Eq.(154) and Eq.(156), to keep the processivity/separation ratio as geometric integer sequence, we use the separation list  $d = [62.5, 125, 250, 500] \text{ kb}$  and the processivity list  $\lambda = [62.5, 125, 250, 500, 1000] \text{ kb}$  in the simulations without additional mechanisms. To limit the parameter combinations in the 5-dimensional parameter scan simulations, we used the separation and processivity combinations  $(d, \lambda) = [(125, 62.5), (125, 125), (125, 250), (250, 125), (250, 250), (250, 500)] \text{ kb}$ , so that processivity/separation ratios of 0.5, 1 and 2 are examined.

### 3.2 Estimation of the fold increase in LEF lifetime upon stabilization by BEs

CTCF can increase cohesin’s chromatin residence time by interacting with cohesin in such a way that it outcompetes cohesin interactions with WAPL, which unloads cohesin from DNA [40]. An independent study found that CTCF could also facilitate cohesin acetylation and prolong the lifetime of acetylated cohesin [41]. Cohesin contains one of the two variant STAG subunits, STAG1 or STAG2 [42]. CTCF stabilizes both cohesin-STAG1 and cohesin-STAG2, but with a lesser extent for cohesin-STAG2 [41]. Cohesin-STAG1’s stable residence time,  $\tau_{\text{cohesin-STAG1,stable}}$ , and dynamic residence time,  $\tau_{\text{cohesin-STAG1,dynamic}}$ , during G1 phase have been determined by inverse fluorescence recovery after photobleaching (iFRAP) [41]:

$$\tau_{\text{cohesin-STAG1,stable}} \approx 5 \text{ hr} \quad (157)$$

$$\tau_{\text{cohesin-STAG1,dynamic}} \approx 15 \text{ min} \quad (158)$$

Since the longer lifetime of cohesin-STAG1 could be attributed to both stabilization by CTCF and acetylation of SMC3 (a subunit of cohesin) by ESCO1 and that cohesin-STAG2 is stabilized by CTCF to a lesser extent than cohesin-STAG1 [41], the ratio of the stable residence time of cohesin-STAG1 and the dynamic residence time of cohesin-STAG1 could serve as an upper bound for the fold increase in LEF lifetime due to stabilization by BEs,  $w$ :

$$w \in [1, 20] \quad (159)$$

### 3.3 Estimation of the fraction and lifetime of long-lived LEFs

Long-lived LEFs can be conceptualized as a subpopulations of LEFs with intrinsic longer lifetime due to chemical modifications such as acetylation of the cohesin subunit SMC3. The STAG subunit of cohesin can be composed of either STAG1 or STAG2 given rise to two distinct forms of cohesin. Cohesin-STAG1 is preferentially acetylated during G1 phase, and cohesin-STAG2 contains four times less acetylated SMC3 relative to cohesin-STAG1 [41]. About  $\sim 30 - 50\%$  of cohesin-STAG1 is stably bound to chromatin in G1 [38, 41, 43]. The relative levels of STAG1 and STAG2 varies substantially between cell types [44]. Cohesin-STAG1 constitutes about 25% of total cohesin in HeLa cell [18], about 33% of total cohesins in immortalized mouse embryonic fibroblasts (iMEFs) [45], and about 55% in normal human bronchial epithelial cells (NHBE) [46], with the rest being cohesin-STAG2.

Taken together, if we assume all the stably bound cohesin-STAG1 is acetylated, up to  $\sim 30\%$  of all cohesin is then acetylated, which we use as an upper bound for the fraction of long-lived LEFs,  $\alpha_o$ , since factors other than chemical modifications such as stabilization by CTCF could also contribute to the stably bound cohesin’s longer lifetime [41]:

$$\alpha_o \in [0, 30\%] \quad (160)$$

Stably bound SCC1 exhibits about 50 fold increase in lifetime compared with the dynamic fraction of SCC1 [41]. Thus we can bound the fold increase in long-lived LEFs' lifetime compared with normal LEFs:

$$s \in [1, 50] \quad (161)$$

To limit the number of free variables, we use an intermediate value  $s = 20$  throughout our study.

### 3.4 Estimation of the fold increase in LEF lifetime upon stabilization by DSB ends

The ATM kinase at DSB ends is hypothesized to phosphorylate cohesin, thereby increasing cohesin's lifetime [47]. When cohesin is stabilized by ATM kinase at DSB ends, the higher processivity means that there is higher probability that cohesin can extrude all the way to adjacent BEs. About 1.5 fold enrichment of SCC1, a subunit of cohesin, at BEs was observed in DSB-containing TADs relative to SCC1 count prior to DSB occurrence [47]. We performed simulations with different fold stabilization of LEF at DSB ends, and found the  $\sim 1.5$  fold enrichment of SCC1 at BEs in DSB-containing TADs corresponds to about 2 to 4 fold stabilization of LEF at DSB ends (**Supplementary Note 3 Fig. 1**). Given the uncertainty associated with the experimental measurement, we use 8 as an upper bound for the fold increase in LEF lifetime due to stabilization by DSB ends,  $r$ :

$$r \in [1, 8] \quad (162)$$

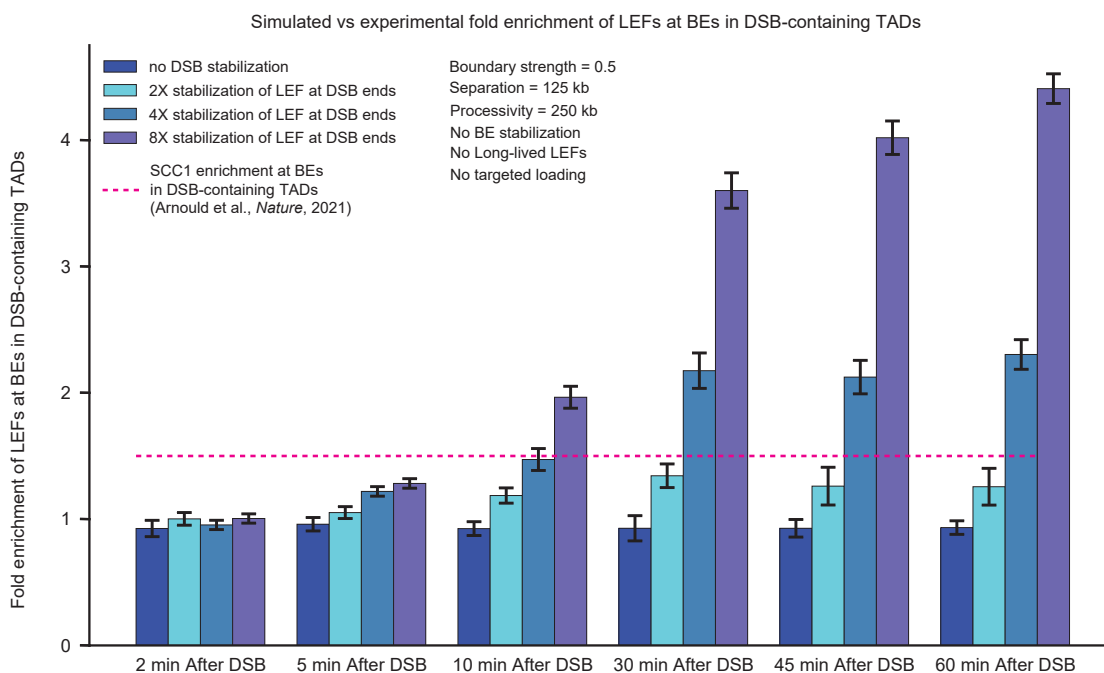

**Supplementary Note 3 Figure 1. Simulated LEF enrichment at BEs in DSB-containing TADs is consistent with experimental observations.** Fold enrichment is calculated as the number of LEFs in the DSB-containing TADs within 5 kb to the BEs at the indicated time points normalized against the number of LEFs in the same regions prior to DSB occurrence. The error bars represent standard error of mean,  $n = 216$  DSB-containing TADs. The pink dashed line represents the SCC1 fold enrichment at BEs in the DSB-containing TAD determined by Arnould et al. [47].

### 3.5 Estimation of the fold increase in LEF loading probability at DSB

Enrichment of cohesins at DSBs has been reported in several studies [47–50], and this enrichment was recently found to be dependent on cohesin loader NIPBL, as well as ATM and MRN complex recruited to DSB sites [47], pointing to a reactive mechanism that targets cohesin to DSB sites. We performed simulations with different fold increase in LEF loading probability at DSB, and found the  $\sim 1.57$  fold enrichment of SCC1 in the chromosome 20 DSB-containing TAD of D1va cells [47] corresponds to about 250 fold increase in LEF loading probability at DSB (**Supplementary Note 3 Fig. 2**). We implemented targeted loading by increasing the loading rate of LEFs within 1 kb of DSB for simplicity, whereas the observed accumulation of LEFs is not limited to the immediate proximity to DSBs but the whole DSB-containing TADs [47], suggesting LEFs might be targeted to larger regions around



DSB instead of just the DSB ends. Therefore, we compared the fold enrichment of LEFs in DSB-containing TADs here instead of just comparing the fold enrichment immediately around DSB ends. Given the noise in ChIP-seq experiments and the 2.5-5 times higher fold enrichment of SCC1 within 4kb around DSB reported by Cheblal et al. [50], we use 5000 (corresponding to 7 fold enrichment of LEFs in DSB-containing TADs) as an upper bound for the fold increase in LEF loading probability at DSB,  $F$ :

$$F \in [1, 5000] \quad (163)$$

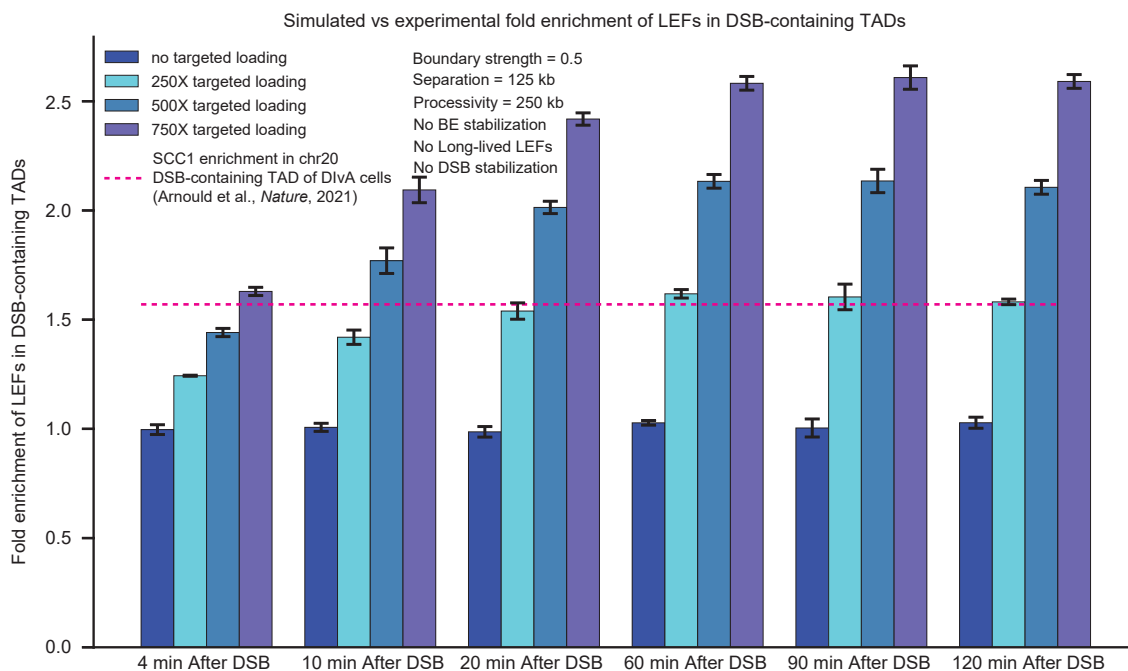

**Supplementary Note 3 Figure 2. Simulated LEF enrichment in DSB-containing TADs is consistent with experimental observations.** Same as **Supplementary Fig. 5A**. Fold enrichment is calculated as the number of LEFs in the DSB-containing TADs at the indicated time points normalized against the number of LEFs in DSB-containing TADs prior to DSB occurrence. The error bars represent standard error of mean,  $n = 216$  DSB-containing TADs. The pink dashed line represents the ChIP-seq SCC1 enrichment in the DSB-containing TAD (TAD boundaries determined by CTCF ChIP-seq data) on chromosome 20 of DivA cells determined by Arnould et al. [47].

## 4 Supplementary Figures

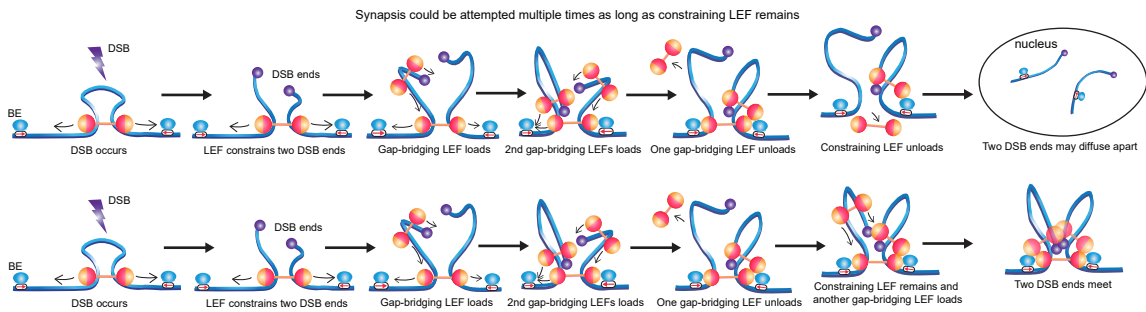

**Supplementary Figure 1. Synapsis could be attempted multiple times as long as constraining LEF remains.** Top row: we assume no further synapsis could be attempted once constraining LEF unloads as two DSB ends may diffuse apart. Bottom row: as long as constraining LEF remains, if gap-bridging LEFs unload before synapsis is achieved, additional gap-bridging LEFs could be loaded to attempt synapsis for multiple rounds until successful synapsis is achieved or the constraining LEF unloads.

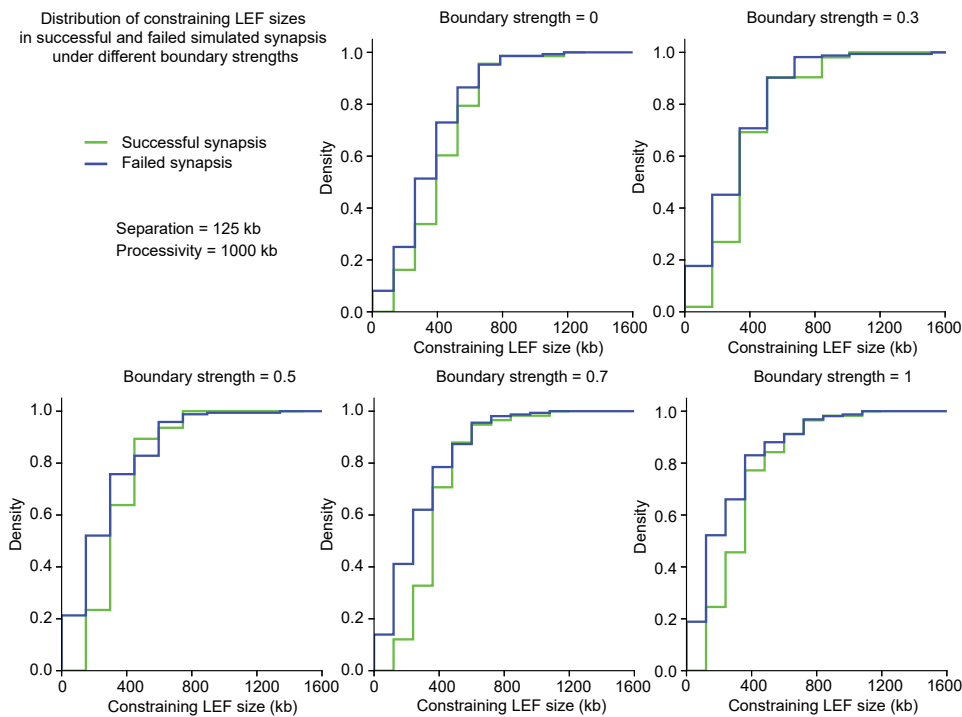

**Supplementary Figure 2. Constraining LEF size does not correlate with boundary strength or whether synapsis succeeds or fails.** The cumulative density function (CDF) of constraining LEF size in successful and failed simulated synapsis. Processivity = 250 kb, separation = 250 kb. Constraining LEF size was recorded at the moment when synapsis is achieved or at the moment when constraining LEF unloads for successful and failed synapsis events respectively.

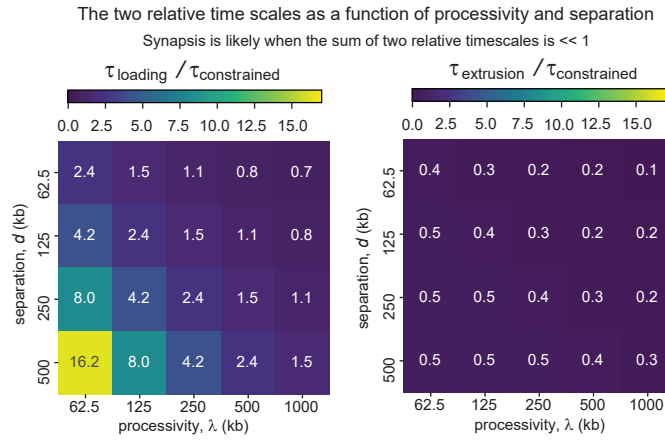

**Supplementary Figure 3. Loading of gap-bridging LEF is the rate limiting step of synapsis** Heatmaps of  $\tau_{\text{loading}}/\tau_{\text{constrained}}$  (left) and  $\tau_{\text{extrusion}}/\tau_{\text{constrained}}$  (right) calculated from Eqs.(74)-(76) across different separation and processivity combinations.

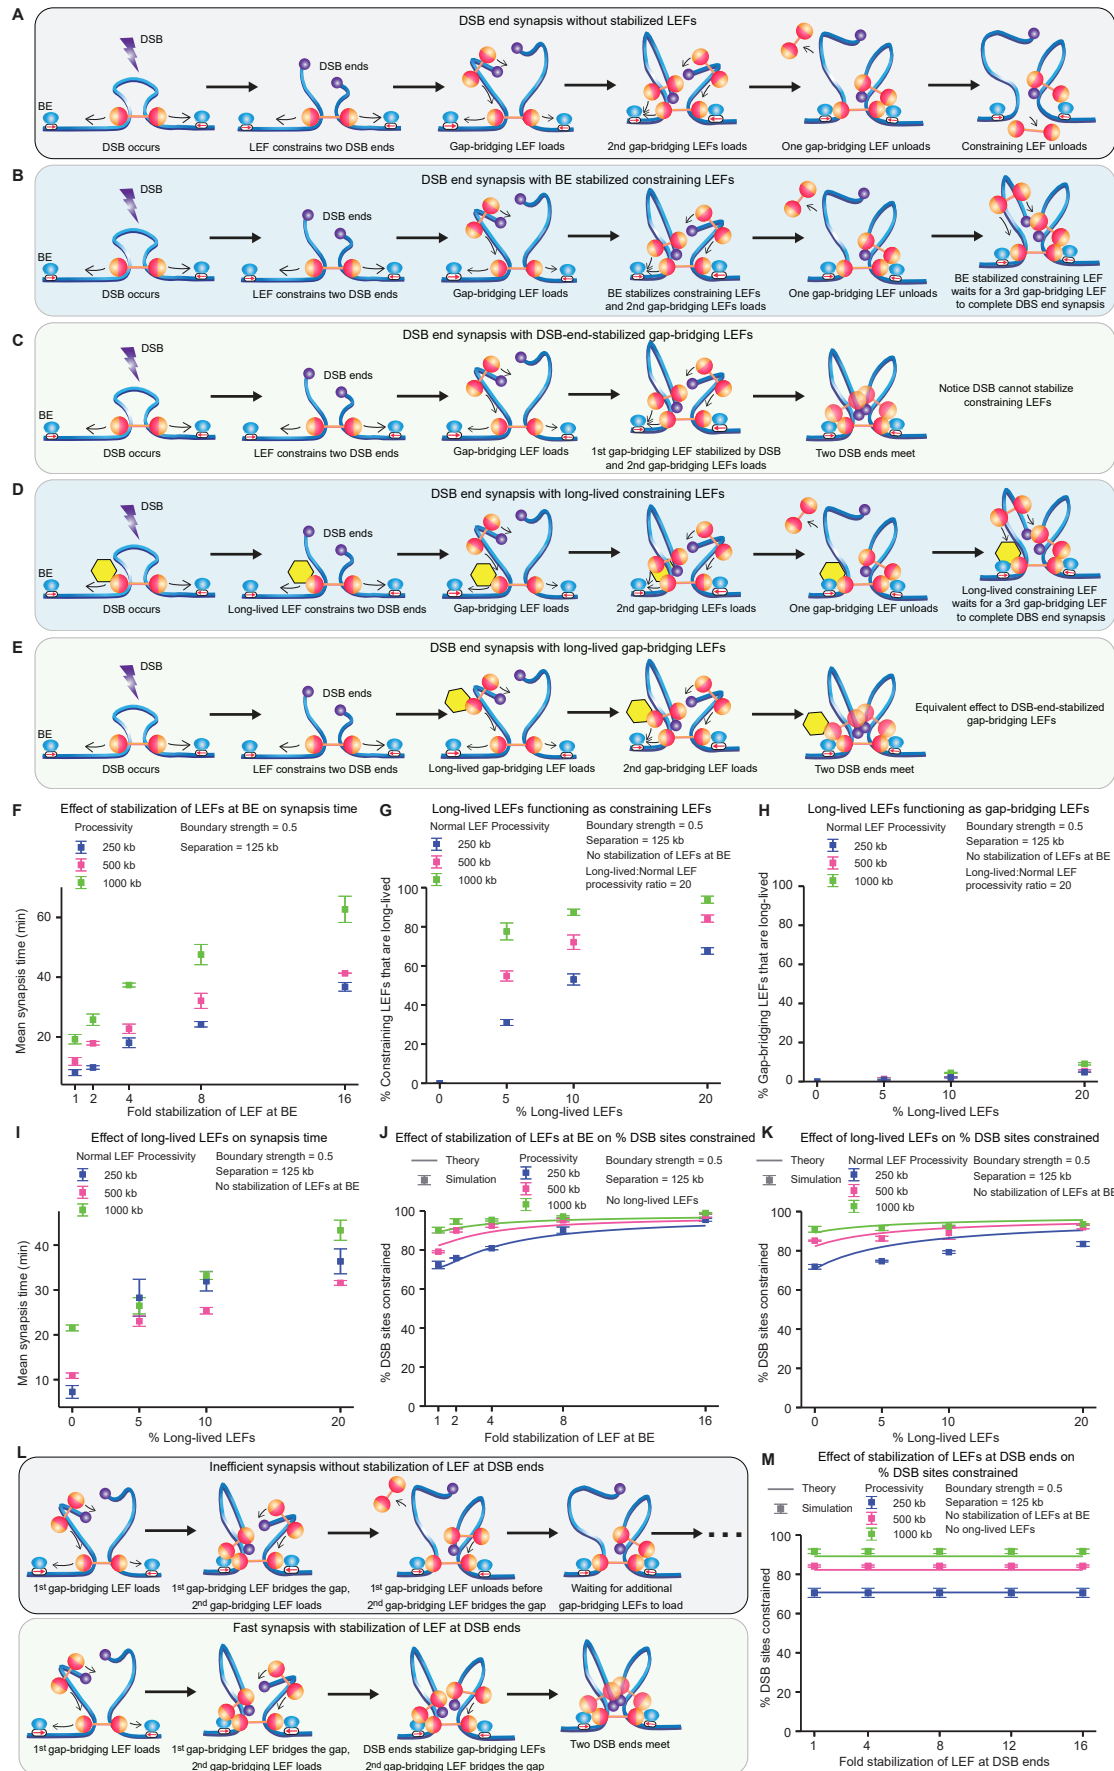

**Supplementary Figure 4. Mechanisms of synapsis facilitated by stabilization of LEFs by BE and DSB, and a small portion of long-lived LEFs.** (A-E) Schematic diagrams of synapsis with LEFs without stabilization (A), with constraining LEFs stabilized by BE (B), with gap-bridging LEFs stabilized by DSB ends (C), with long-lived constraining LEFs (D), or with long-lived gap-bridging LEFs (E). (F) The effect of stabilization of LEF at BE on the mean synapsis time. Conversion of simulation time steps to synapsis time assumes total extrusion speed of 1 kb/s. The error bars represent the standard error of mean, n = 3 independent simulations, with 216-218 DSB events per simulation. (G) Percentages of constraining LEFs that are long-lived. The error bars represent the standard error of mean, n = 3 independent simulations, with 216-218 DSB events per simulation. (H) Percentages of gap-bridging LEFs that are long-lived. The error bars represent the standard error of mean, n = 3 independent simulations, with 216-218 DSB events per simulation. (I) The effect of stabilization of LEF at BE on the mean synapsis time. Conversion of simulation time steps to synapsis time assumes total extrusion speed of 1 kb/s. The error bars represent the standard error of mean, n = 3 independent simulations, with 216-218 DSB events per simulation. (J,K) The effect of stabilization of LEF at BE (J) and a small subpopulation of long-lived LEFs (K) on the probability of DSB occurring inside a DNA loop. The error bars represent the standard error of mean, n = 3 independent simulations, with 216-218 DSB events per simulation. (L) Schematic diagram of synapsis with LEF stabilization by DSB ends, leading to more efficient synapsis. (M) DSB stabilization has no impact on the probability of DSB occurring inside a DNA loop. The error bars represent the standard error of mean, n = 3 independent simulations, with 216-218 DSB events per simulation.

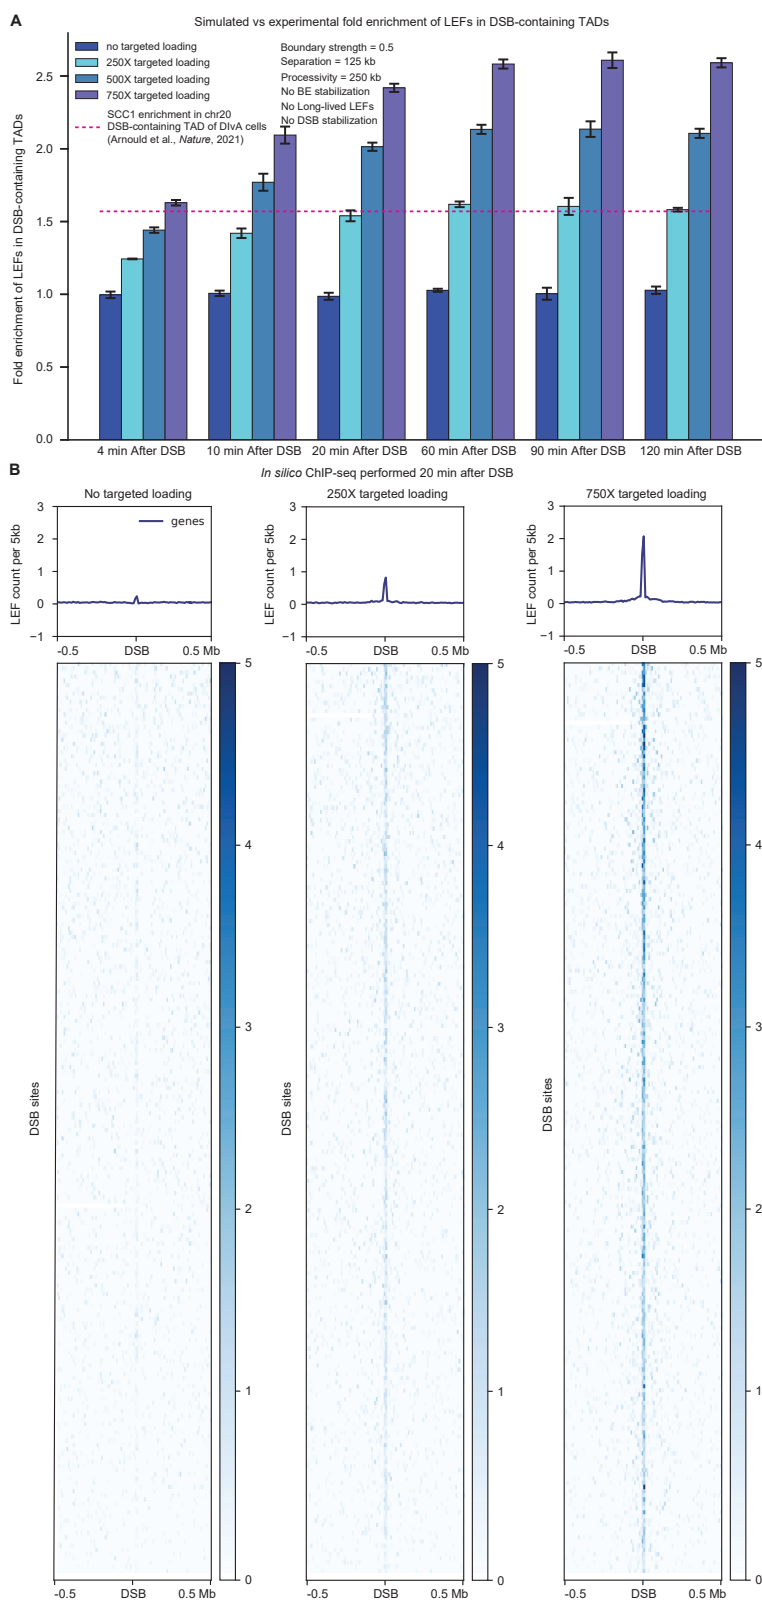

**Supplementary Figure 5. *In silico* ChIP-seq results showing LEF enrichment at DSB consistent with experimental observations (A)** Fold enrichment of LEFs in DSB-containing TADs. Fold enrichment is calculated as the number of LEFs in the DSB-containing TADs at the indicated time points normalized against the number of LEFs in DSB-containing TADs prior to DSB occurrence. The error bars represent standard error of mean,  $n = 216$  DSB-containing TADs. The pink dashed line represents the ChIP-seq SCC1 enrichment in the DSB-containing TAD (TAD boundaries determined by CTCF ChIP-seq data) on chromosome 20 of DlvA cells [47]. **(B)** Enrichment heatmaps and metaplots of LEFs at DSB sites 20 minutes post DSB occurrence, aligned by their distance from the DSB site along the genome (Mb). Bin size=5 kb.

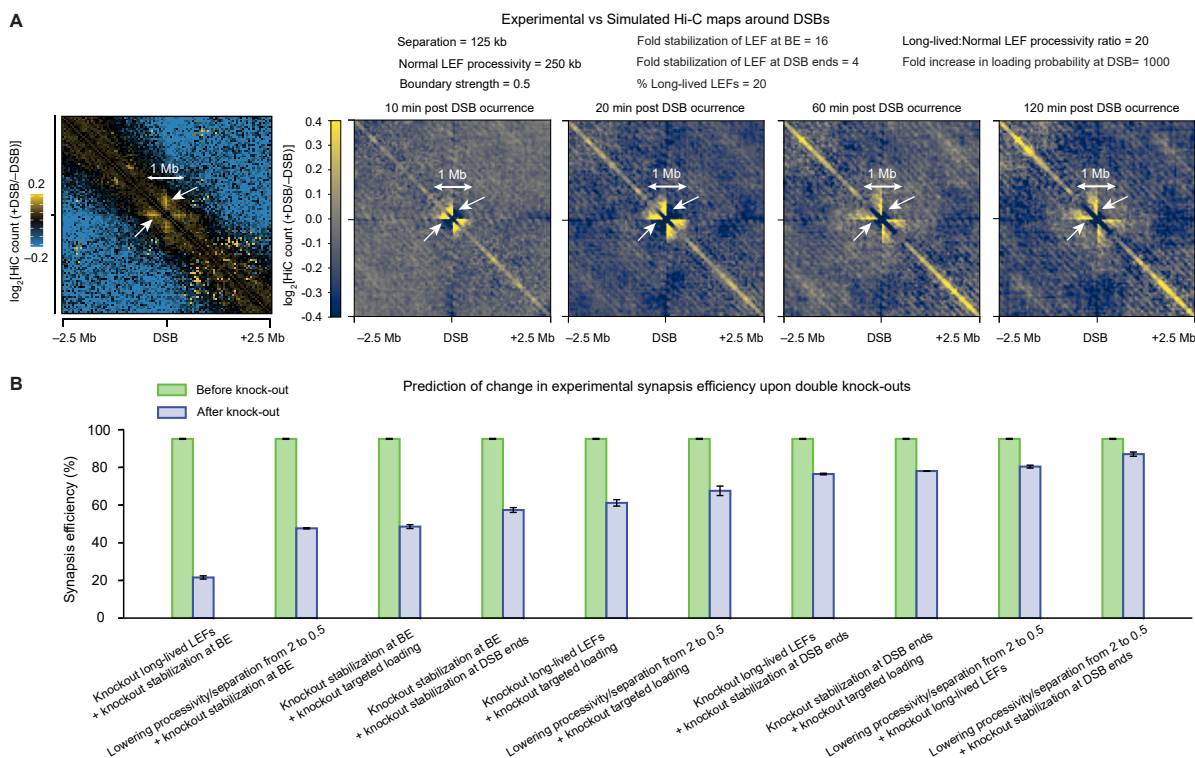

**Supplementary Figure 6. Parameter combination with  $\geq 95\%$  synapsis efficiency predicts Hi-C maps with similar pattern as experimental data, and double knock-outs significantly reduces synapsis efficiency for most knock-out combinations (A)** The Hi-C contact maps of  $\log_2[+DSB/-DSB]$  centered on the DSBs at the indicated time points post DSB occurrence averaged over 603 DSBs (50-kb resolution, 5-Mb window) show a similar pattern to the experimental Hi-C map reused from Fig.2b by Arnould et al. [47] shown in the left. The contact maps are simulated with one parameter combination (indicated in legend) producing  $\geq 95\%$  synapsis efficiency. The white arrows highlight the stripe pattern. **(B)** The bar plot shows the synapsis efficiency before and after knocking out two of the five mechanisms discussed in Fig. 6. The error bars represent standard error of mean,  $n = 3$  different parameter combinations that achieved  $\geq 95\%$  synapsis efficiency before knock-out.

## References

- [1] Zhao, B., Rothenberg, E., Ramsden, D. A. & Lieber, M. R. The molecular basis and disease relevance of non-homologous DNA end joining. *Nature Reviews Molecular Cell Biology* **21**, 765–781 (2020).
- [2] Soutoglou, E. *et al.* Positional stability of single double-strand breaks in mammalian cells. *Nature cell biology* **9**, 675–682 (2007).
- [3] Graham, T. G., Walter, J. C. & Loparo, J. J. Two-stage synapsis of DNA ends during non-homologous end joining. *Molecular cell* **61**, 850–858 (2016).
- [4] Chen, S. *et al.* Structural basis of long-range to short-range synaptic transition in NHEJ. *Nature* **593**, 294–298 (2021).
- [5] Chaplin, A. K. *et al.* Cryo-EM of NHEJ supercomplexes provides insights into DNA repair. *Molecular cell* (2021).
- [6] Taleei, R. & Nikjoo, H. Repair of the double-strand breaks induced by low energy electrons: a modelling approach. *International journal of radiation biology* **88**, 948–953 (2012).
- [7] Amitai, A. & Holcman, D. Diffusing polymers in confined microdomains and estimation of chromosomal territory sizes from chromosome capture data. *Physical review letters* **110**, 248105 (2013).
- [8] Zhu, Y. *et al.* qDSB-Seq is a general method for genome-wide quantification of DNA double-strand breaks using sequencing. *Nature communications* **10**, 1–11 (2019).
- [9] Vilenchik, M. M. & Knudson, A. G. Endogenous DNA double-strand breaks: production, fidelity of repair, and induction of cancer. *Proceedings of the National Academy of Sciences* **100**, 12871–12876 (2003).
- [10] Roukos, V. *et al.* Spatial dynamics of chromosome translocations in living cells. *Science* **341**, 660–664 (2013).
- [11] Tiana, G. *et al.* Structural fluctuations of the chromatin fiber within topologically associating domains. *Biophysical journal* **110**, 1234–1245 (2016).
- [12] Shukron, O., Hauer, M. & Holcman, D. Two loci single particle trajectories analysis: constructing a first passage time statistics of local chromatin exploration. *Scientific reports* **7**, 1–11 (2017).
- [13] Miné-Hattab, J. & Rothstein, R. Increased chromosome mobility facilitates homology search during recombination. *Nature cell biology* **14**, 510–517 (2012).
- [14] Dion, V., Kalck, V., Horigome, C., Towbin, B. D. & Gasser, S. M. Increased mobility of double-strand breaks requires Mec1, Rad9 and the homologous recombination machinery. *Nature cell biology* **14**, 502–509 (2012).
- [15] Goloborodko, A., Marko, J. F. & Mirny, L. A. Chromosome compaction by active loop extrusion. *Biophysical journal* **110**, 2162–2168 (2016).
- [16] Banigan, E. J. & Mirny, L. A. Limits of chromosome compaction by loop-extruding motors. *Physical Review X* **9**, 031007 (2019).
- [17] Cattoglio, C. *et al.* Determining cellular CTCF and cohesin abundances to constrain 3D genome models. *Elife* **8**, e40164 (2019).
- [18] Holzmann, J. *et al.* Absolute quantification of cohesin, CTCF and their regulators in human cells. *Elife* **8**, e46269 (2019).
- [19] Lengronne, A. *et al.* Cohesin relocation from sites of chromosomal loading to places of convergent transcription. *Nature* **430**, 573–578 (2004).
- [20] Newkirk, D. A. *et al.* The effect of nipped-B-like (Nipbl) haploinsufficiency on genome-wide cohesin binding and target gene expression: modeling Cornelia de Lange syndrome. *Clinical epigenetics* **9**, 1–20 (2017).
- [21] Davidson, I. F. & Peters, J.-M. Genome folding through loop extrusion by SMC complexes. *Nature Reviews Molecular Cell Biology* **22**, 445–464 (2021).
- [22] Busslinger, G. A. *et al.* Cohesin is positioned in mammalian genomes by transcription, CTCF and Wapl. *Nature* **544**, 503–507 (2017).
- [23] Brandão, H. B. *et al.* RNA polymerases as moving barriers to condensin loop extrusion. *Proceedings of the National Academy of Sciences* **116**, 20489–20499 (2019).
- [24] Canela, A. *et al.* Genome organization drives chromosome fragility. *Cell* **170**, 507–521 (2017).
- [25] Shastri, N. *et al.* Genome-wide identification of structure-forming repeats as principal sites of fork collapse upon ATR inhibition. *Molecular cell* **72**, 222–238 (2018).
- [26] Canela, A. *et al.* Topoisomerase II-induced chromosome breakage and translocation is determined by chromosome architecture and transcriptional activity. *Molecular cell* **75**, 252–266 (2019).
- [27] Gothe, H. J. *et al.* Spatial chromosome folding and active transcription drive DNA fragility and formation of oncogenic MLL translocations. *Molecular cell* **75**, 267–283 (2019).
- [28] Madabhushi, R. *et al.* Activity-induced DNA breaks govern the expression of neuronal early-response genes. *Cell* **161**, 1592–1605 (2015).
- [29] Puerto, S. *et al.* Induction, processing and persistence of radiation-induced chromosomal aberrations involving hamster euchromatin and heterochromatin. *Mutation Research/Genetic Toxicology and Environmental Mutagenesis* **469**, 169–179 (2000).
- [30] Hansen, A. S. CTCF as a boundary factor for cohesin-mediated loop extrusion: evidence for a multi-step mechanism. *Nucleus* **11**, 132–148 (2020).
- [31] Ganji, M. *et al.* Real-time imaging of DNA loop extrusion by condensin. *Science* **360**, 102–105 (2018).
- [32] Kong, M. *et al.* Human condensin i and ii drive extensive ATP-dependent compaction of nucleosome-bound DNA. *Molecular cell* **79**, 99–114 (2020).



- [33] Golfier, S., Quail, T., Kimura, H. & Brugués, J. Cohesin and condensin extrude DNA loops in a cell cycle-dependent manner. *Elife* **9**, e53885 (2020).
- [34] Kim, Y., Shi, Z., Zhang, H., Finkelstein, I. J. & Yu, H. Human cohesin compacts DNA by loop extrusion. *Science* **366**, 1345–1349 (2019).
- [35] Davidson, I. F. *et al.* DNA loop extrusion by human cohesin. *Science* **366**, 1338–1345 (2019).
- [36] Rao, S. S. *et al.* Cohesin loss eliminates all loop domains. *Cell* **171**, 305–320 (2017).
- [37] Gibcus, J. H. *et al.* A pathway for mitotic chromosome formation. *Science* **359** (2018).
- [38] Hansen, A. S., Pustova, I., Cattoglio, C., Tjian, R. & Darzacq, X. CTCF and cohesin regulate chromatin loop stability with distinct dynamics. *Elife* **6**, e25776 (2017).
- [39] Walther, N. *et al.* A quantitative map of human Condensins provides new insights into mitotic chromosome architecture. *Journal of Cell Biology* **217**, 2309–2328 (2018).
- [40] Li, Y. *et al.* The structural basis for cohesin–CTCF-anchored loops. *Nature* **578**, 472–476 (2020).
- [41] Wutz, G. *et al.* ESCO1 and CTCF enable formation of long chromatin loops by protecting cohesin/STAG1 from WAPL. *Elife* **9**, e52091 (2020).
- [42] Arruda, N. L. *et al.* Distinct and overlapping roles of STAG1 and STAG2 in cohesin localization and gene expression in embryonic stem cells. *Epigenetics & chromatin* **13**, 1–17 (2020).
- [43] Gerlich, D., Koch, B., Dupeux, F., Peters, J.-M. & Ellenberg, J. Live-cell imaging reveals a stable cohesin-chromatin interaction after but not before DNA replication. *Current Biology* **16**, 1571–1578 (2006).
- [44] Cuadrado, A. & Losada, A. Specialized functions of cohesins STAG1 and STAG2 in 3D genome architecture. *Current opinion in genetics & development* **61**, 9–16 (2020).
- [45] Remeseiro, S., Cuadrado, A., Gómez-López, G., Pisano, D. G. & Losada, A. A unique role of cohesin-SA1 in gene regulation and development. *The EMBO journal* **31**, 2090–2102 (2012).
- [46] Kojic, A. *et al.* Distinct roles of cohesin-SA1 and cohesin-SA2 in 3D chromosome organization. *Nature structural & molecular biology* **25**, 496–504 (2018).
- [47] Arnould, C. *et al.* Loop extrusion as a mechanism for formation of DNA damage repair foci. *Nature* **590**, 660–665 (2021).
- [48] Caron, P. *et al.* Cohesin protects genes against  $\gamma$ H2AX induced by DNA double-strand breaks. *PLoS genetics* **8**, e1002460 (2012).
- [49] Meisenberg, C. *et al.* Repression of transcription at DNA breaks requires cohesin throughout interphase and prevents genome instability. *Molecular cell* **73**, 212–223 (2019).
- [50] Cheblal, A. *et al.* DNA damage-induced nucleosome depletion enhances homology search independently of local break movement. *Molecular Cell* **80**, 311–326 (2020).
